# Supplementary material
Source: bioRxiv or medRxiv preprint supplement (https://www.biorxiv.org/highwire/filestream/21688/field_highwire_adjunct_files/0/076117-1.pdf)

## Figure S2

### Mouse Cryptic Exons from *Quantitative analysis of cryptic splicing associated with TDP-43 depletion*

Jack Humphrey, Warren Emmett, Pietro Fratta, Adrian M. Isaacs & Vincent Plagnol

September 16, 2016

Each cryptic exon discovered in either of the two mouse datasets was visualised in both datasets using the IGV browser. For each dataset, the biological replicates were combined to create merged files for each condition. Read coverage and splice junctions are shown. The Ensembl transcripts for the mm10 build are provided, as are the coordinates of the cryptic exons discovered by CryptEx.

# 1 Abr E026i1

## Mouse Adult Brain

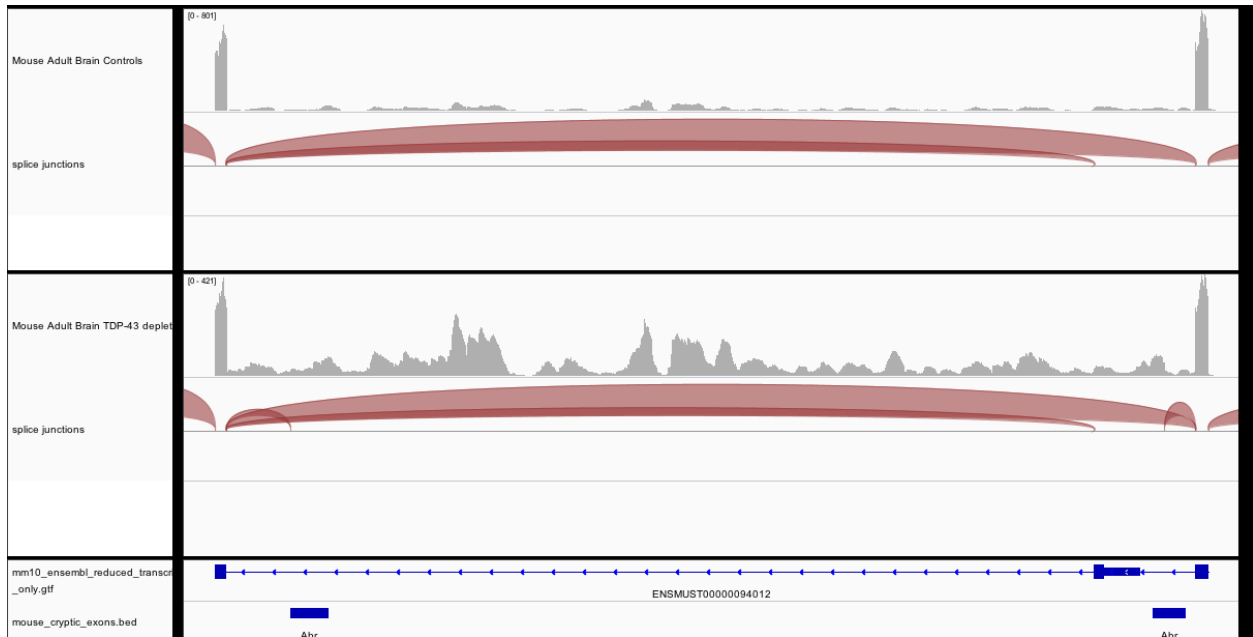

## Mouse Embryonic Stem Cells

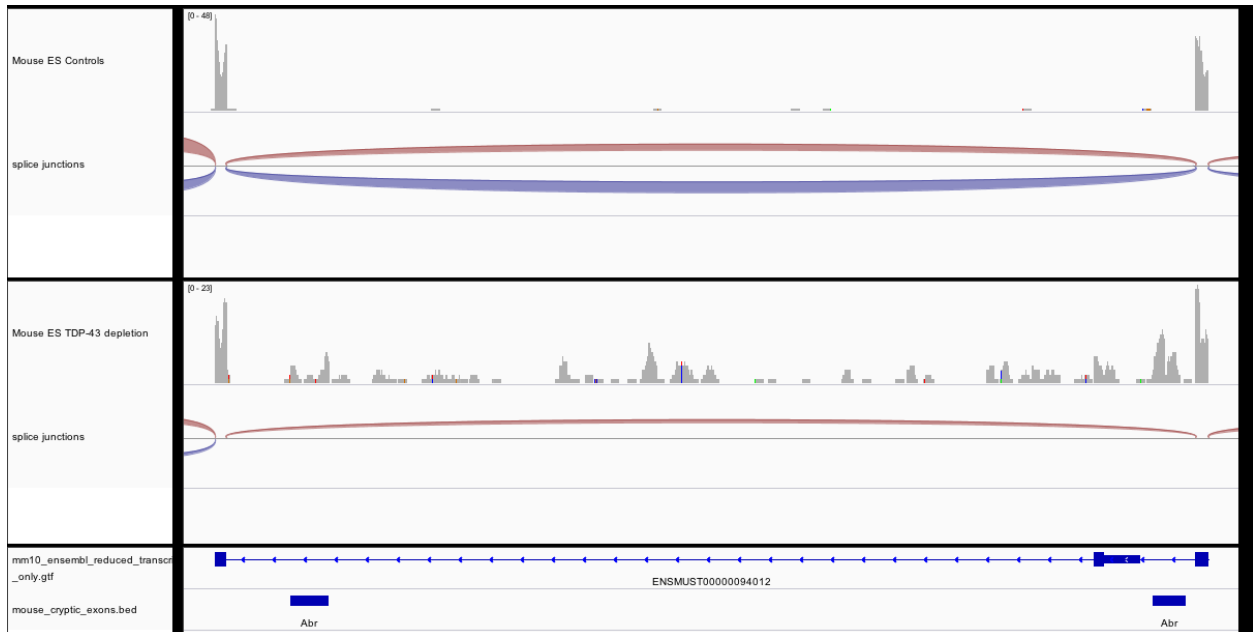

## 2 Pnpla6 E016i1

Mouse Adult Brain

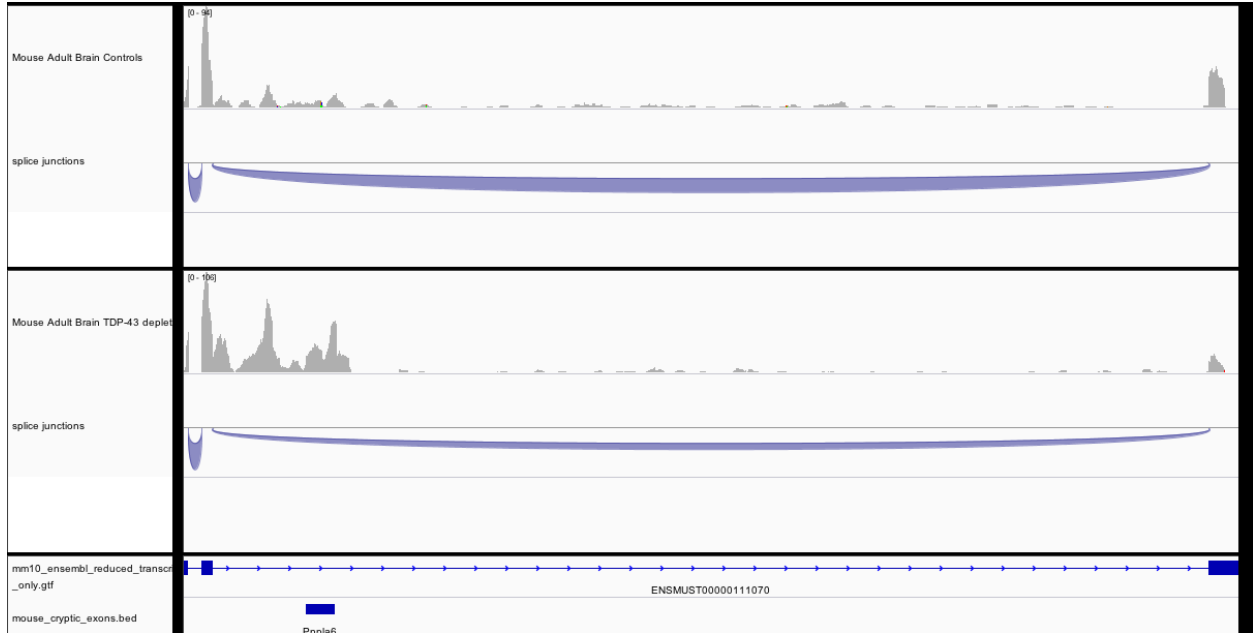

Mouse Embryonic Stem Cells

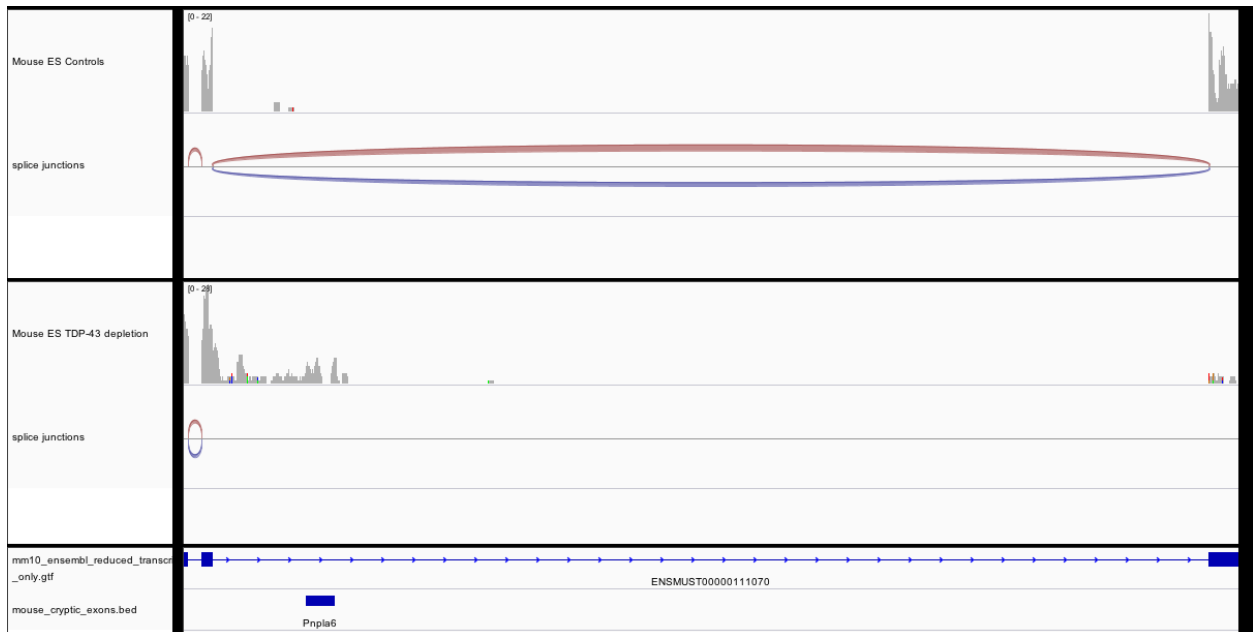

### 3 Lrrc49 E017i3

Mouse Adult Brain

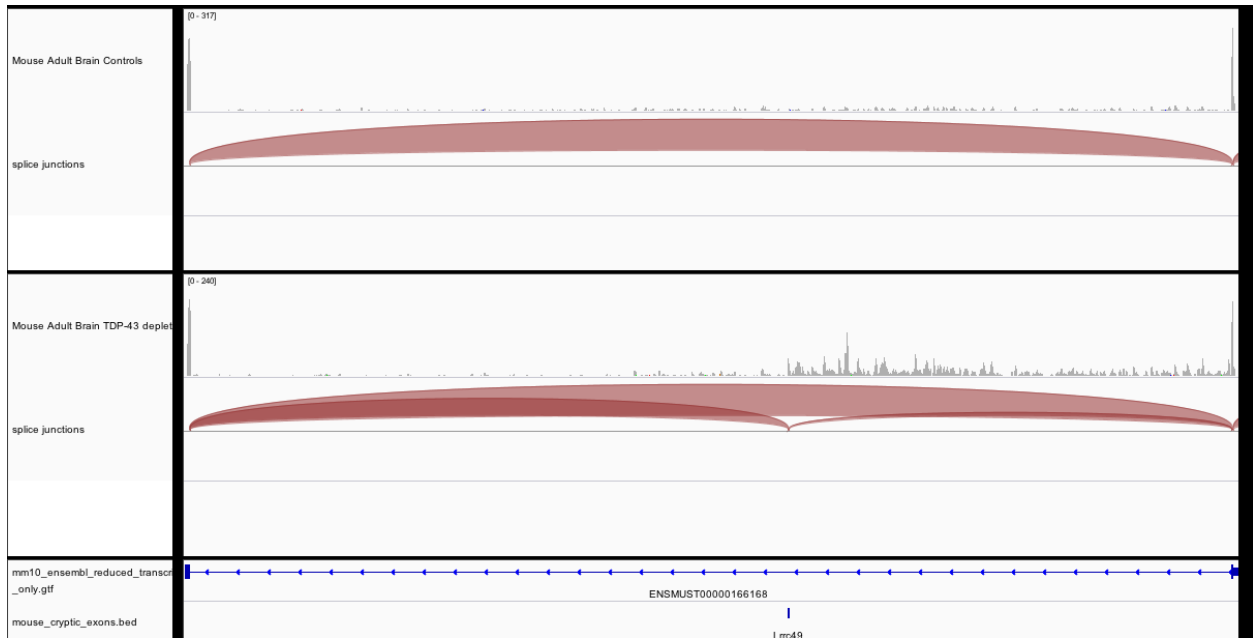

Mouse Embryonic Stem Cells

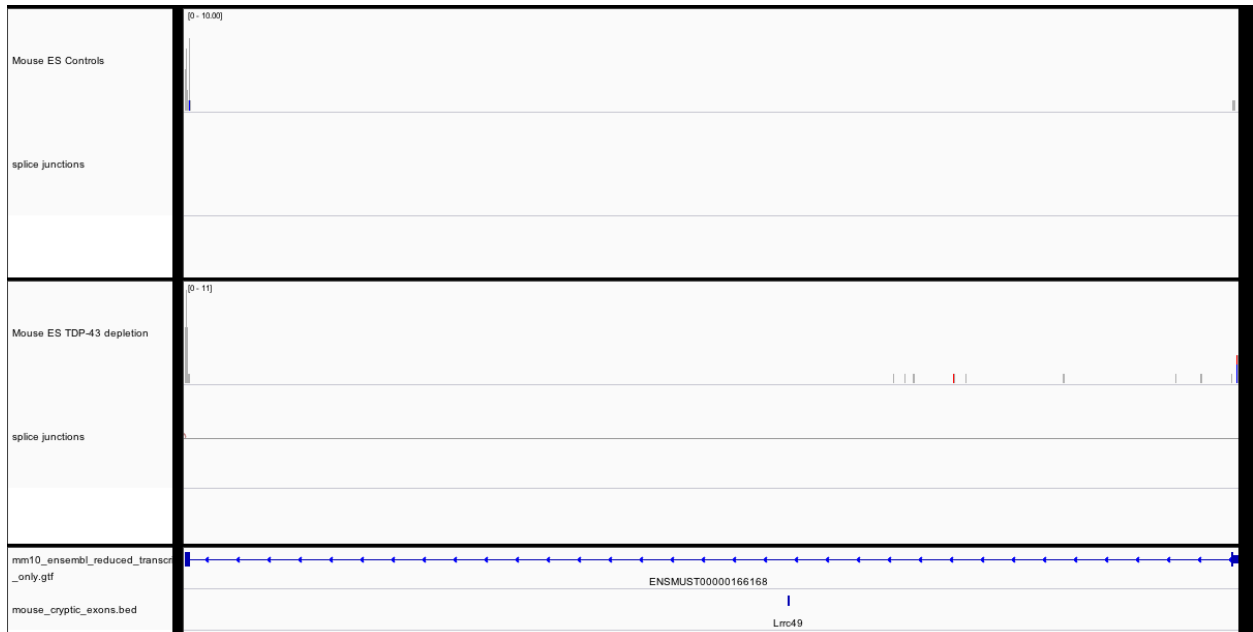

# 4 Ccdc149 E009i3

Mouse Adult Brain

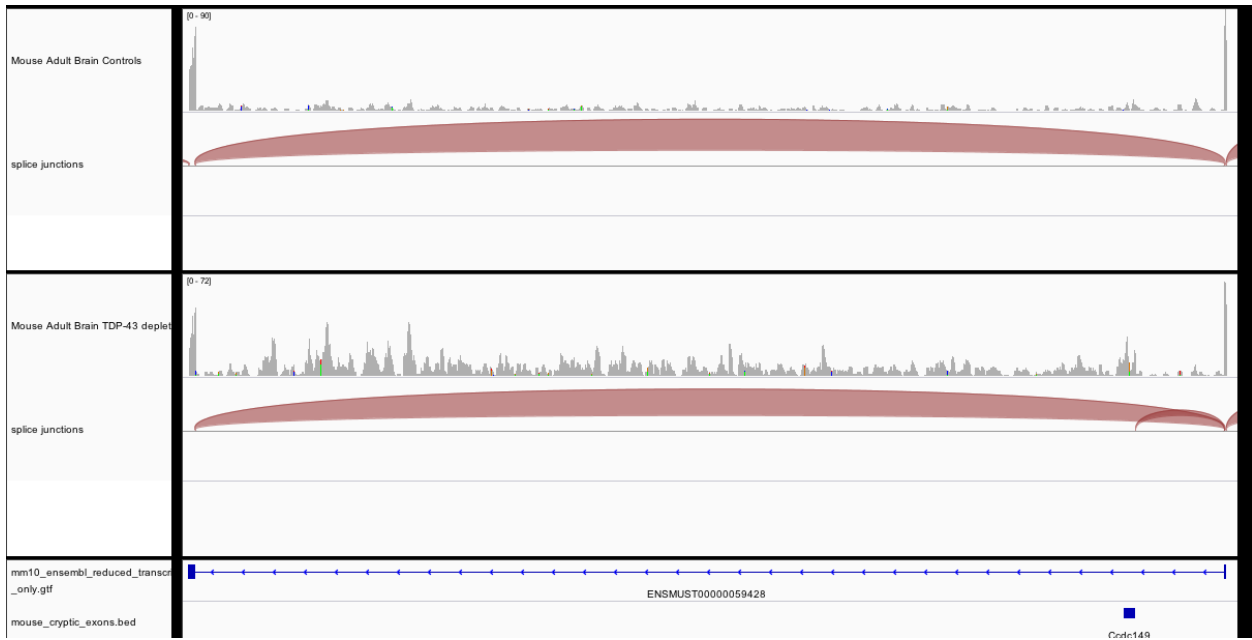

Mouse Embryonic Stem Cells

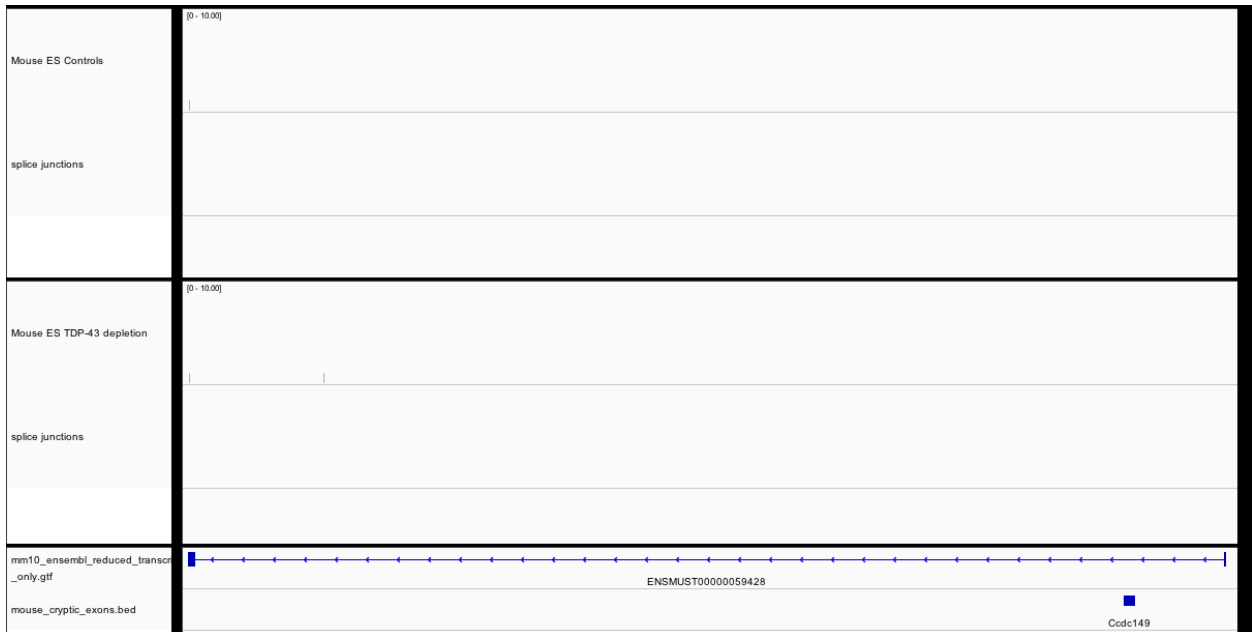

# 5 Ak5 E014i6

## Mouse Adult Brain

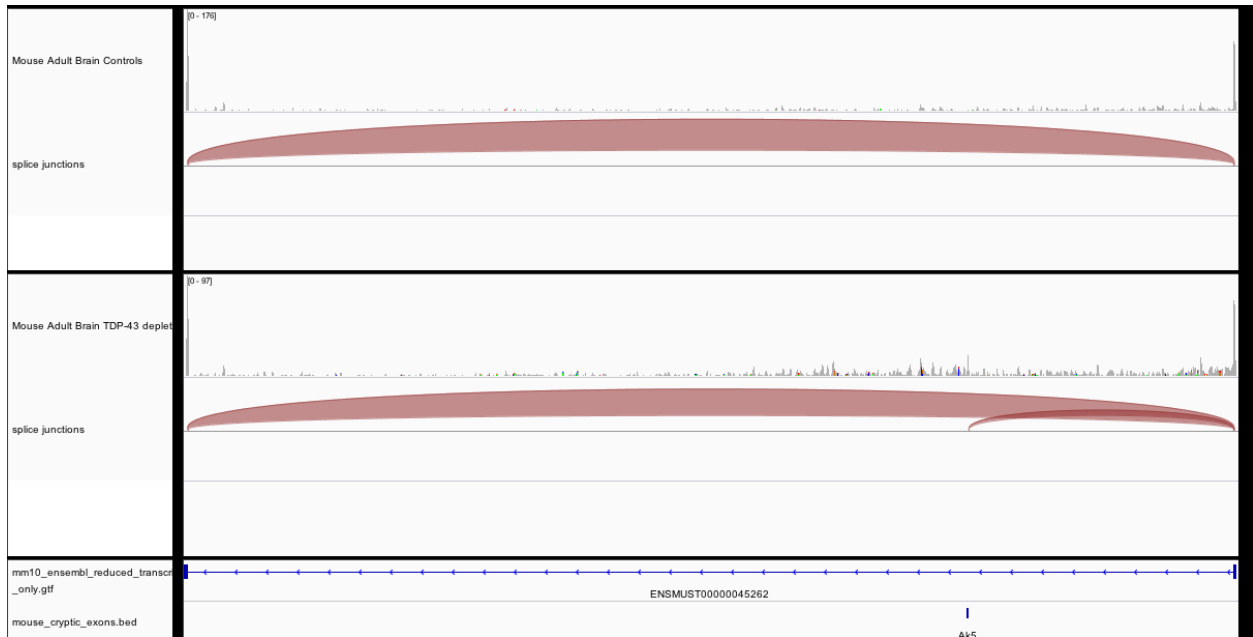

## Mouse Embryonic Stem Cells

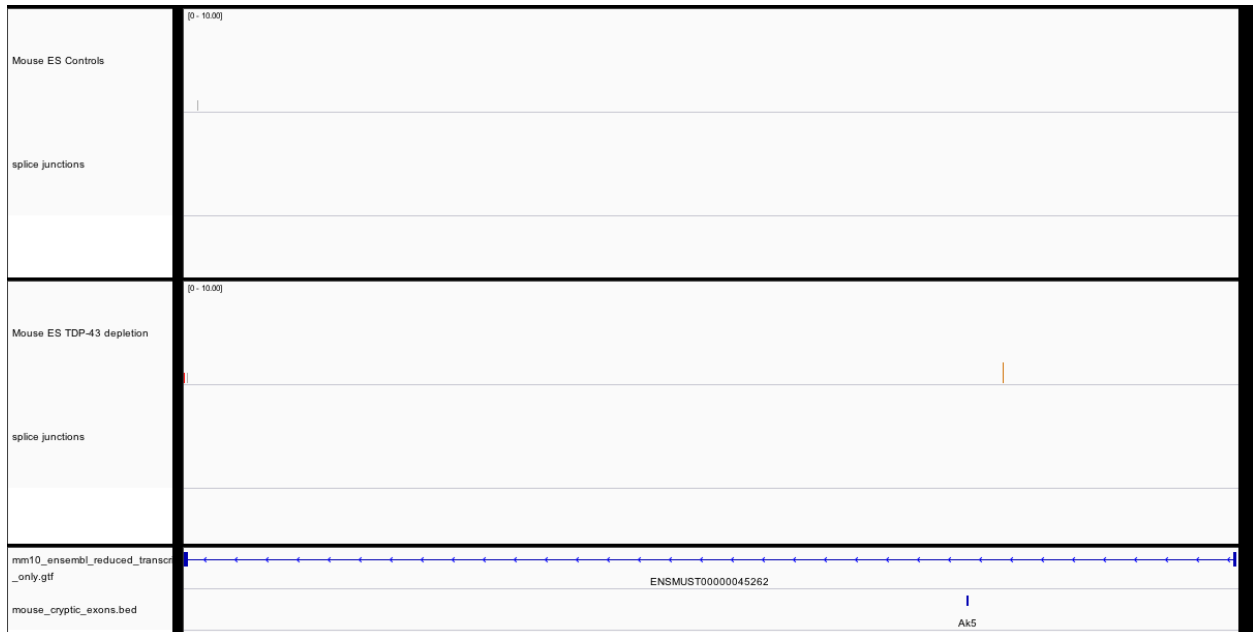

# 6 Kctd10 E017i2

Mouse Adult Brain

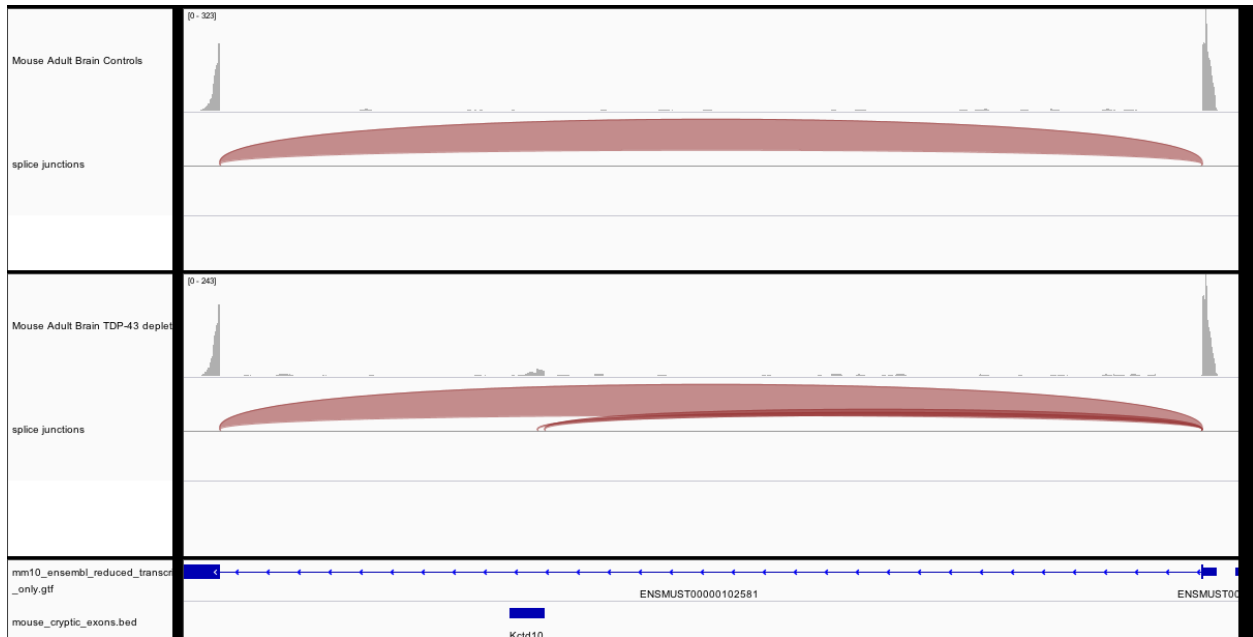

Mouse Embryonic Stem Cells

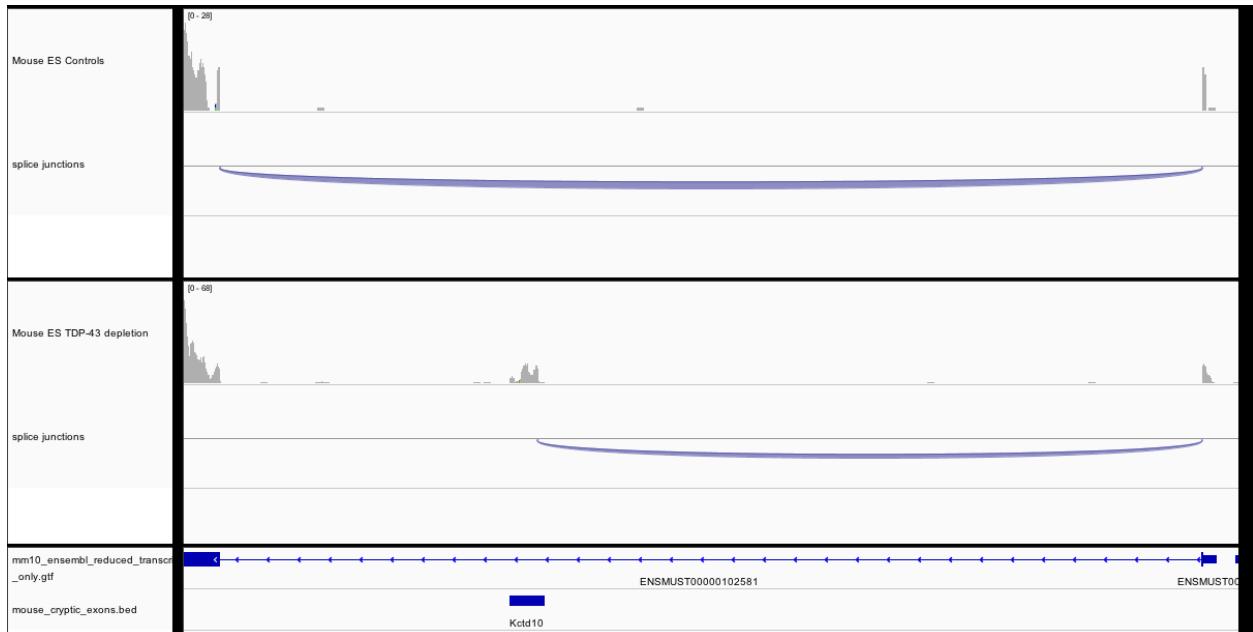

# 7 Tmem14a E005i1

## Mouse Adult Brain

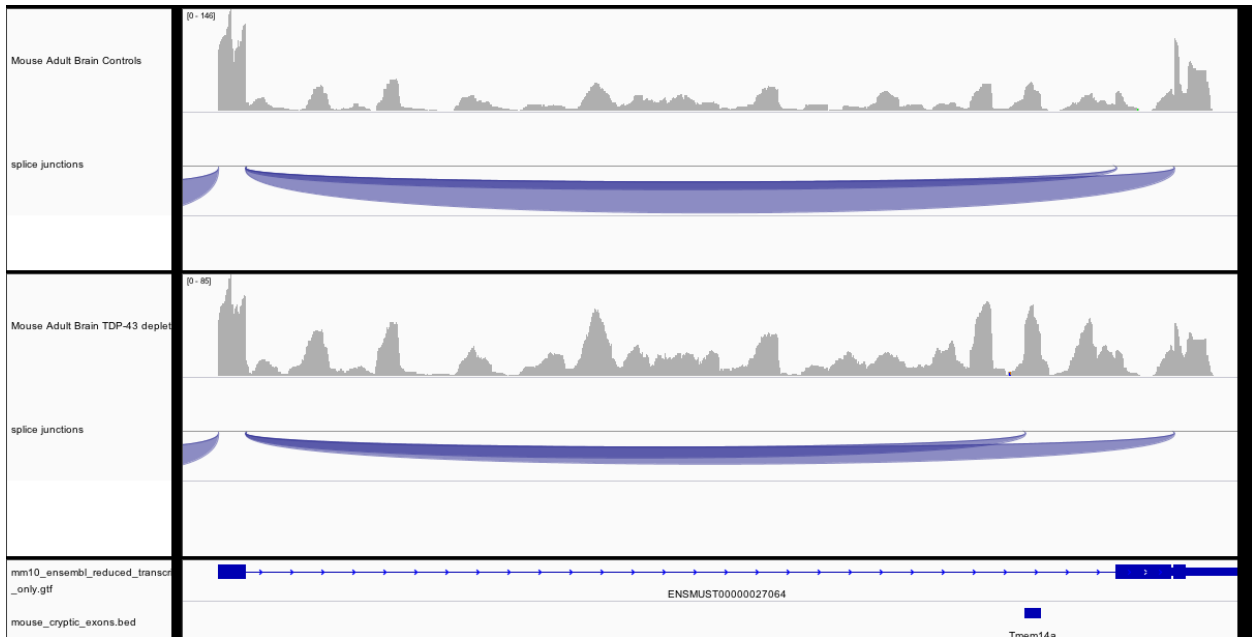

## Mouse Embryonic Stem Cells

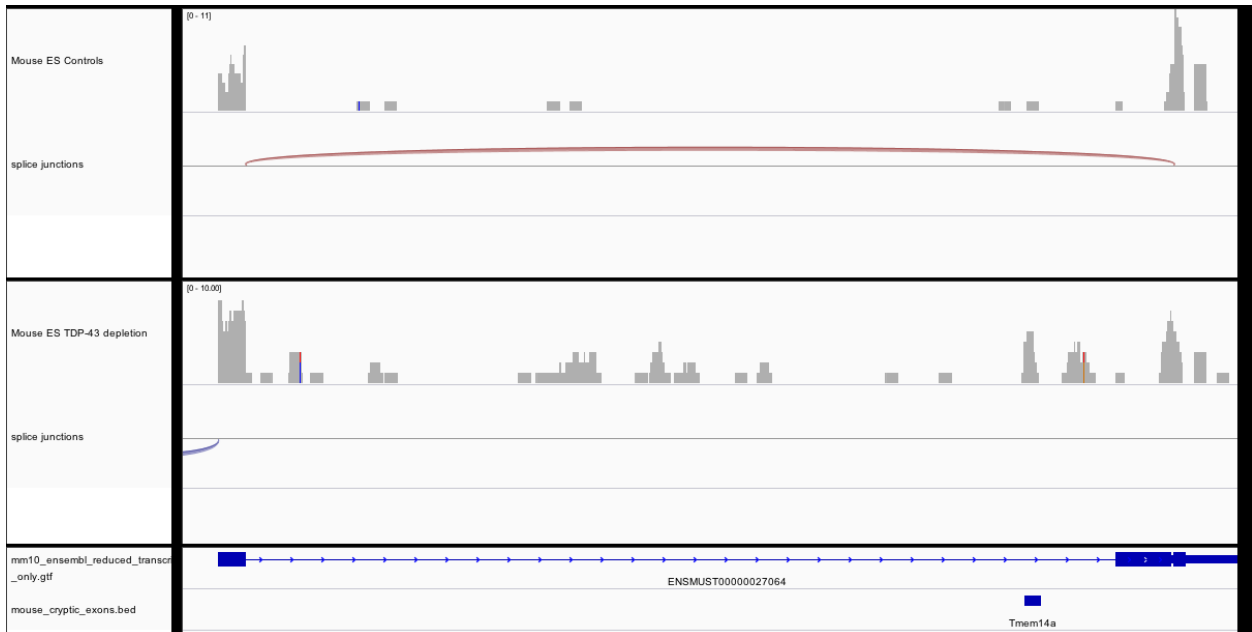



# 8 Apod E006i1

## Mouse Adult Brain

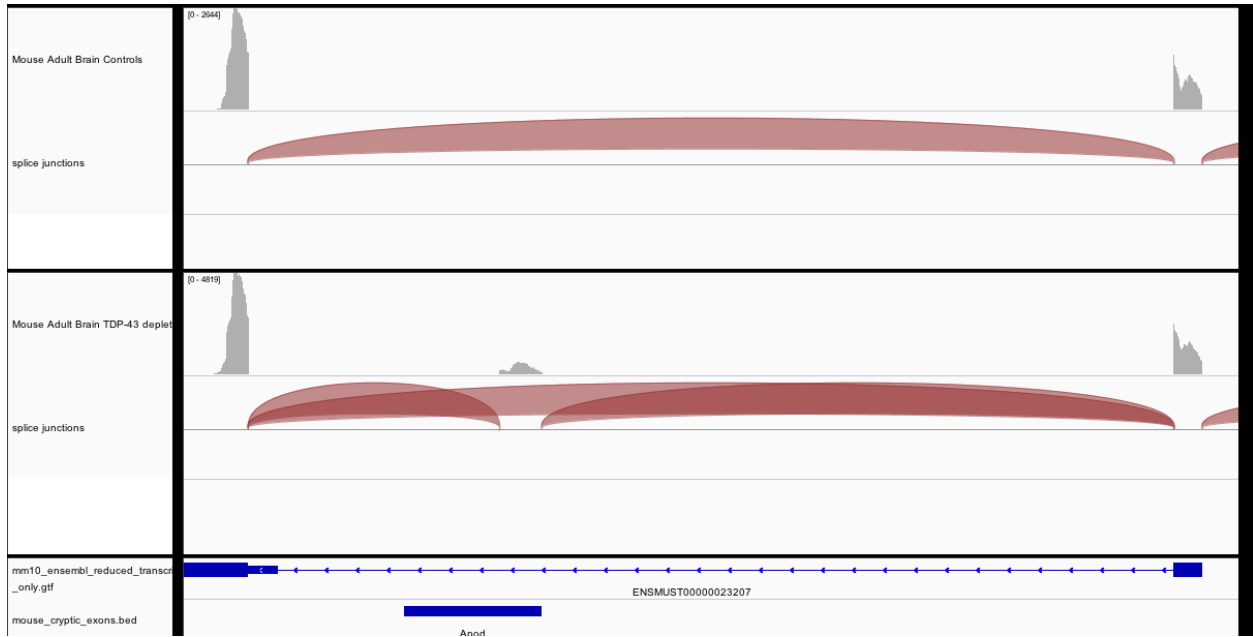

## Mouse Embryonic Stem Cells

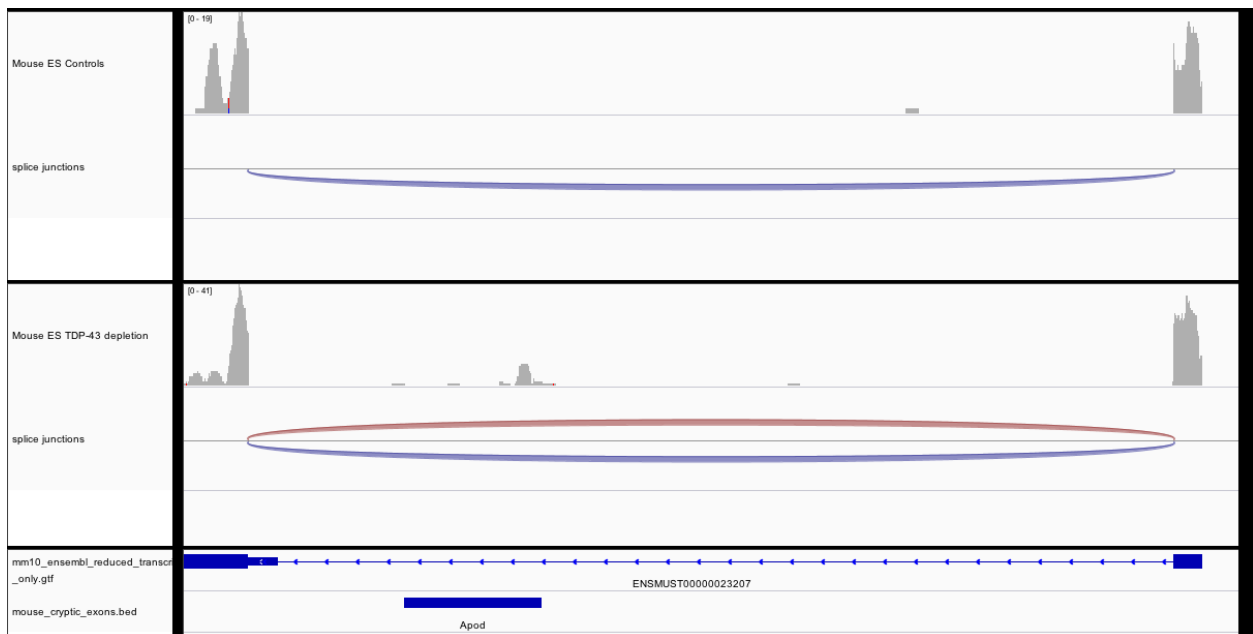

# 9 Erbb2ip E026i1

Mouse Adult Brain

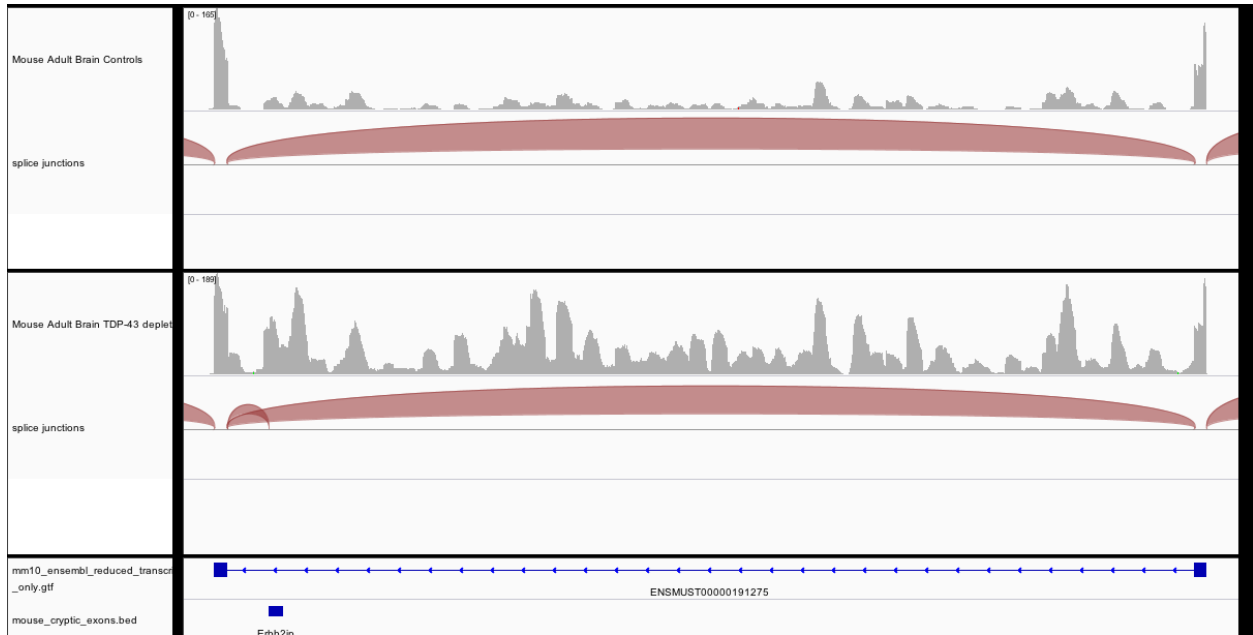

Mouse Embryonic Stem Cells

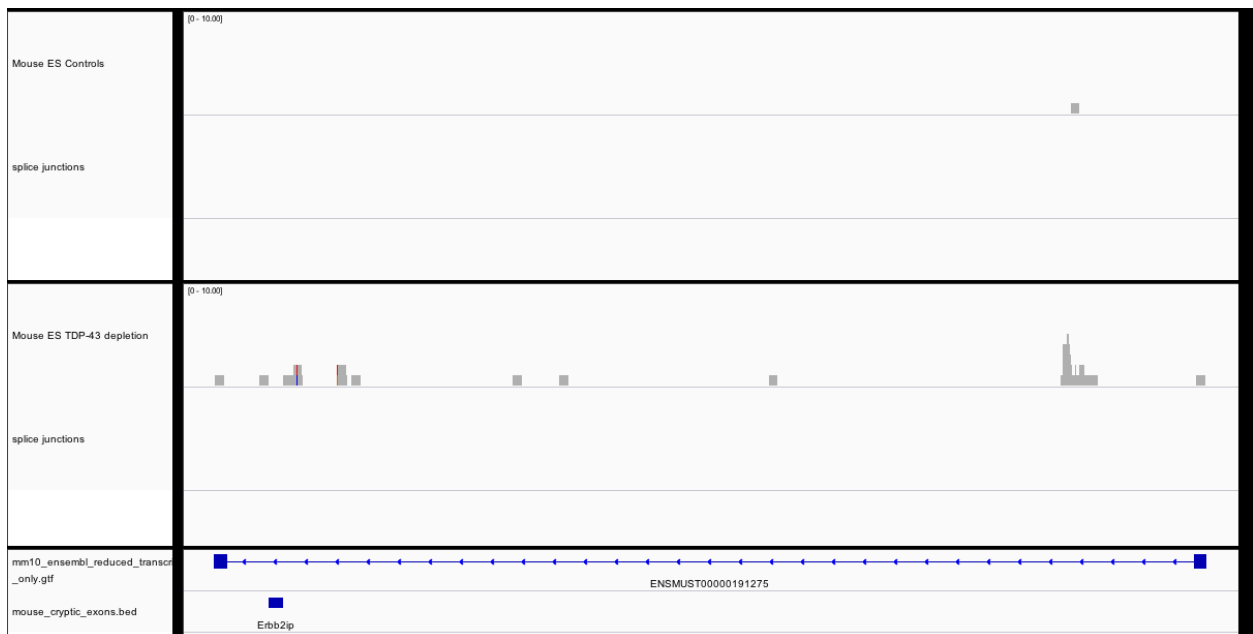

# 10 Trim8 E001i2

## Mouse Adult Brain

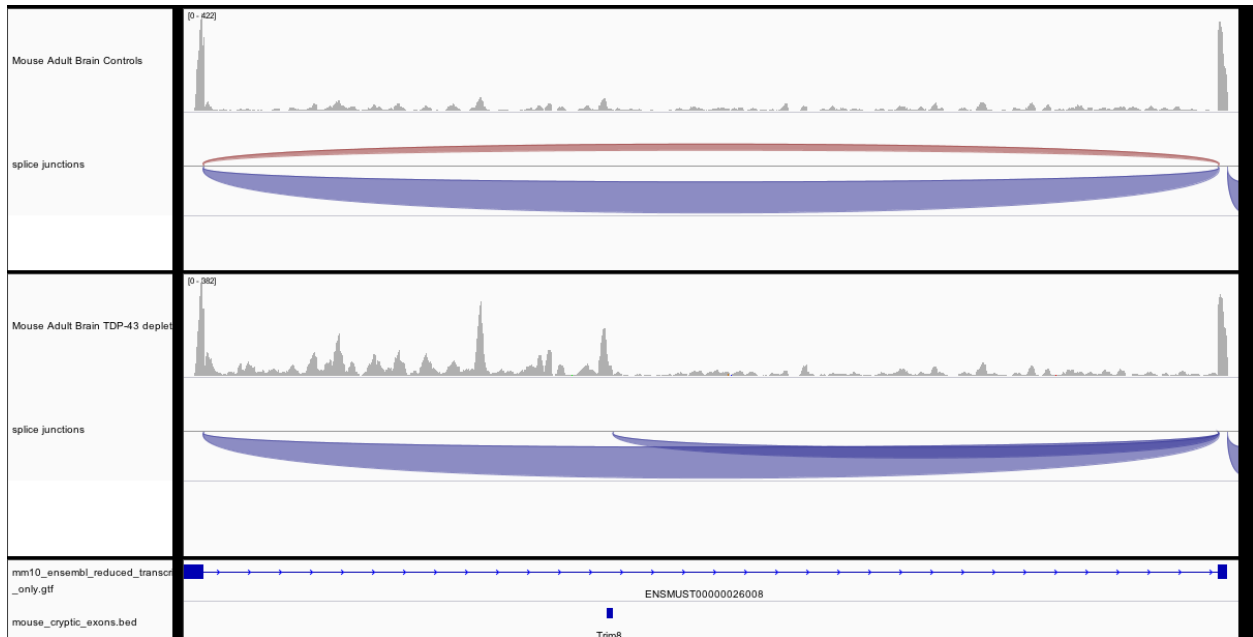

## Mouse Embryonic Stem Cells

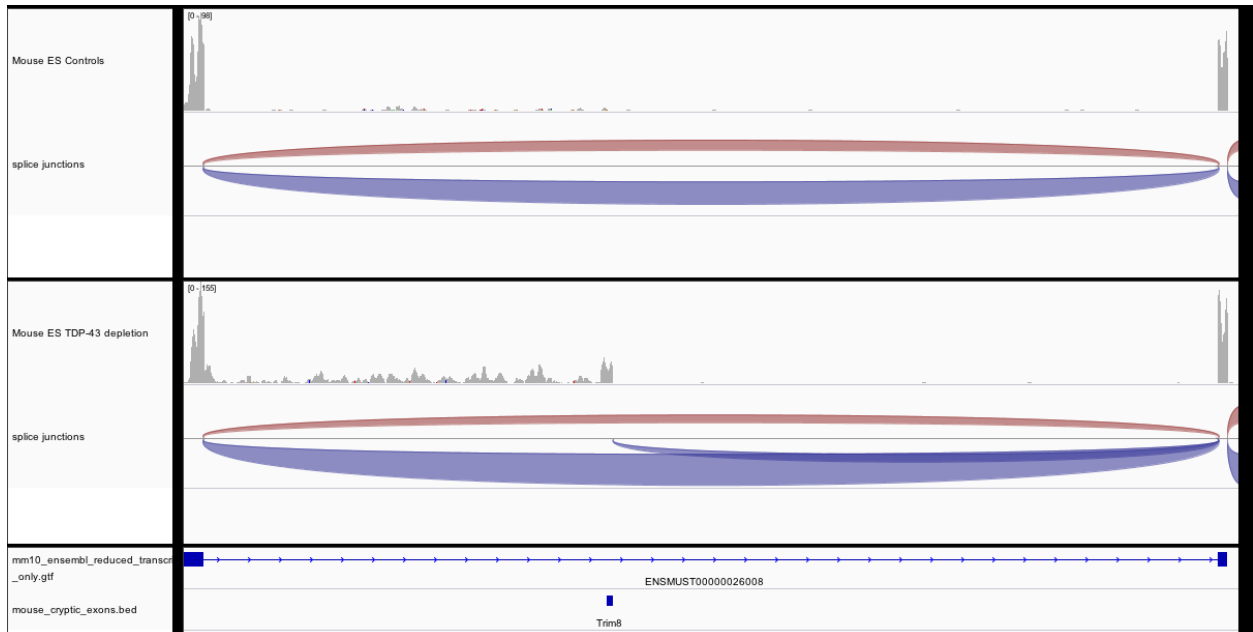

# 11 Usp15 E015i3

## Mouse Adult Brain

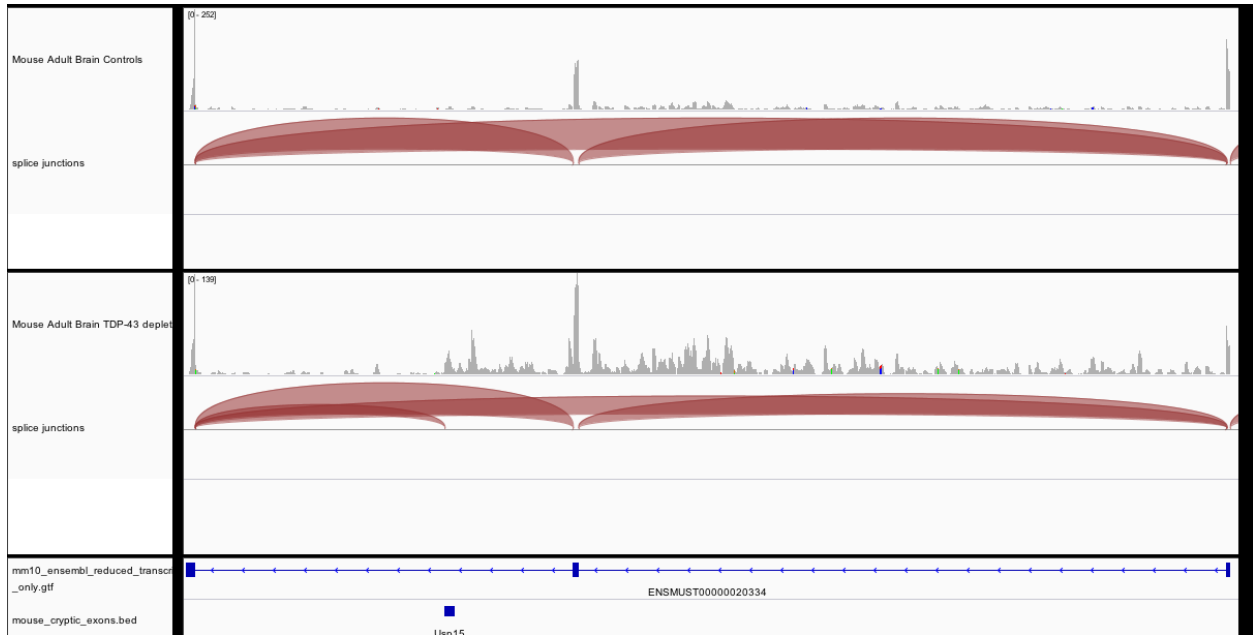

## Mouse Embryonic Stem Cells

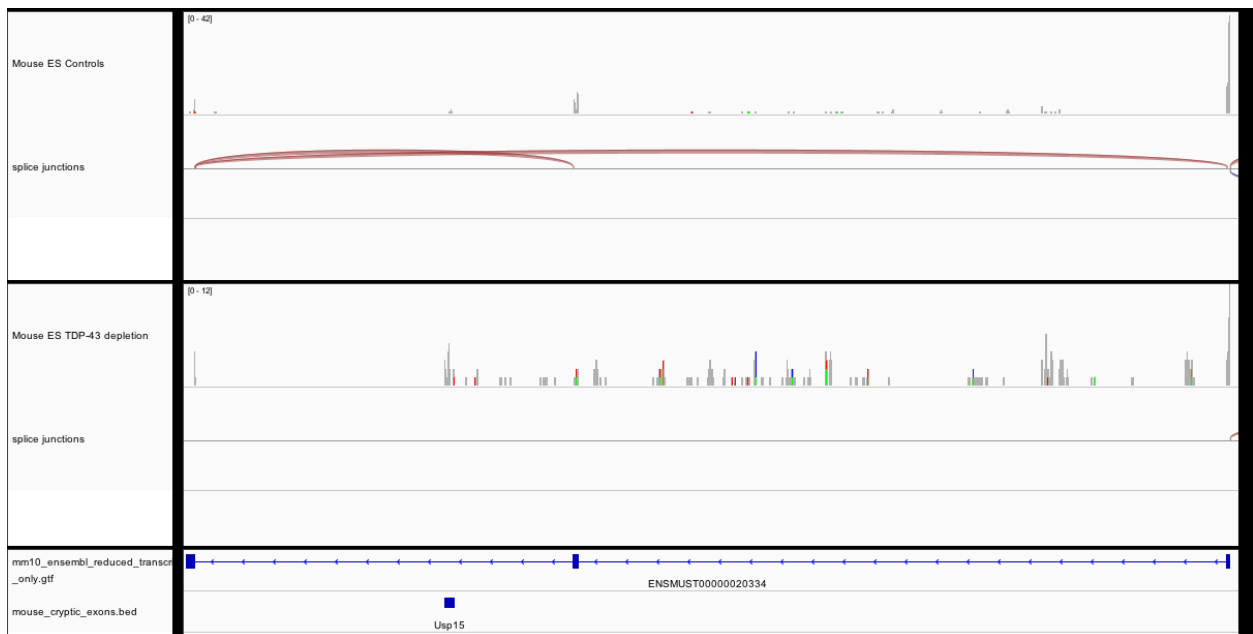

# 12 Fam135a E008i1

## Mouse Adult Brain

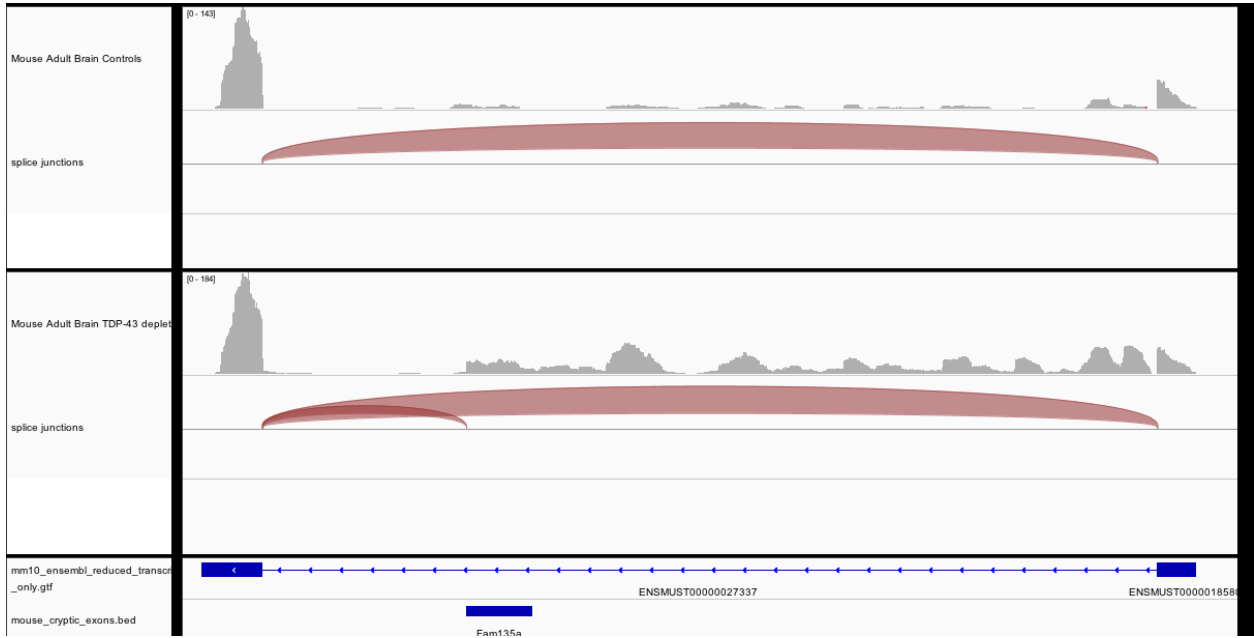

## Mouse Embryonic Stem Cells

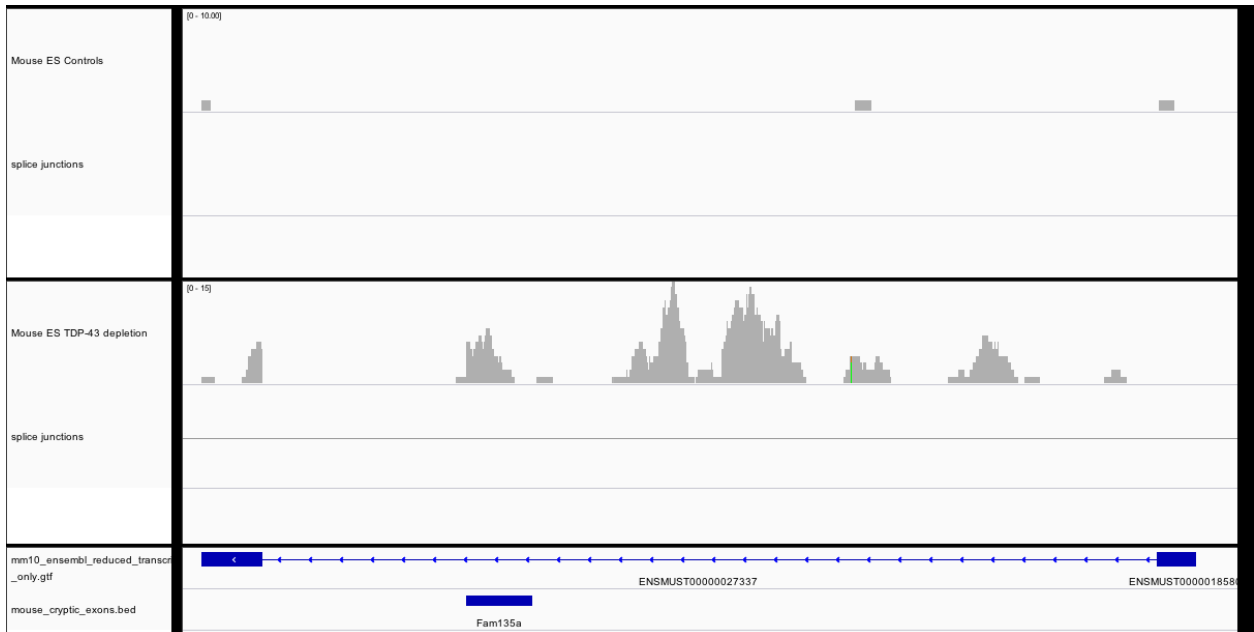

# 13 Rasal1 E007i1

## Mouse Adult Brain

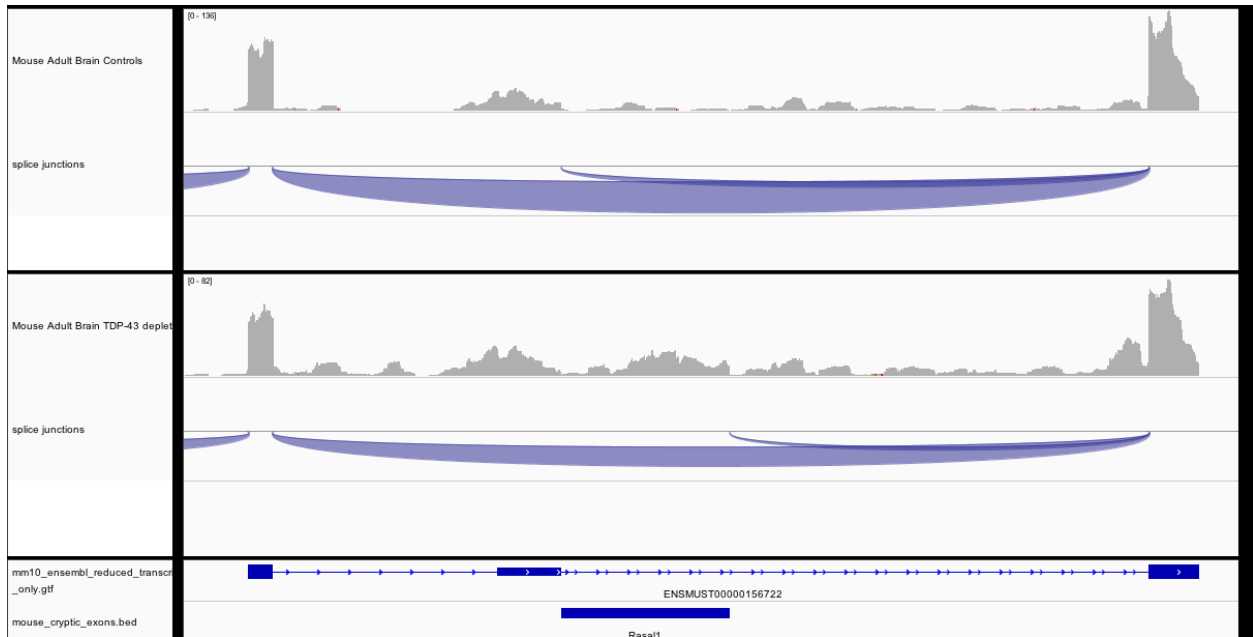

## Mouse Embryonic Stem Cells

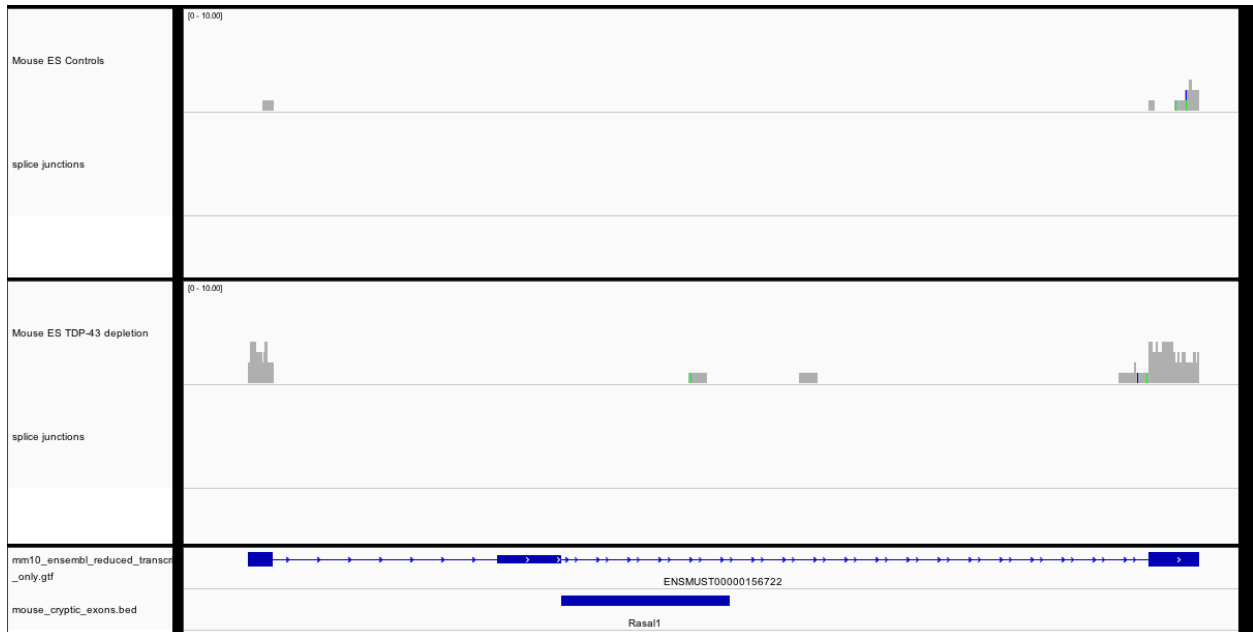

# 14 Brms11 E008i1

## Mouse Adult Brain

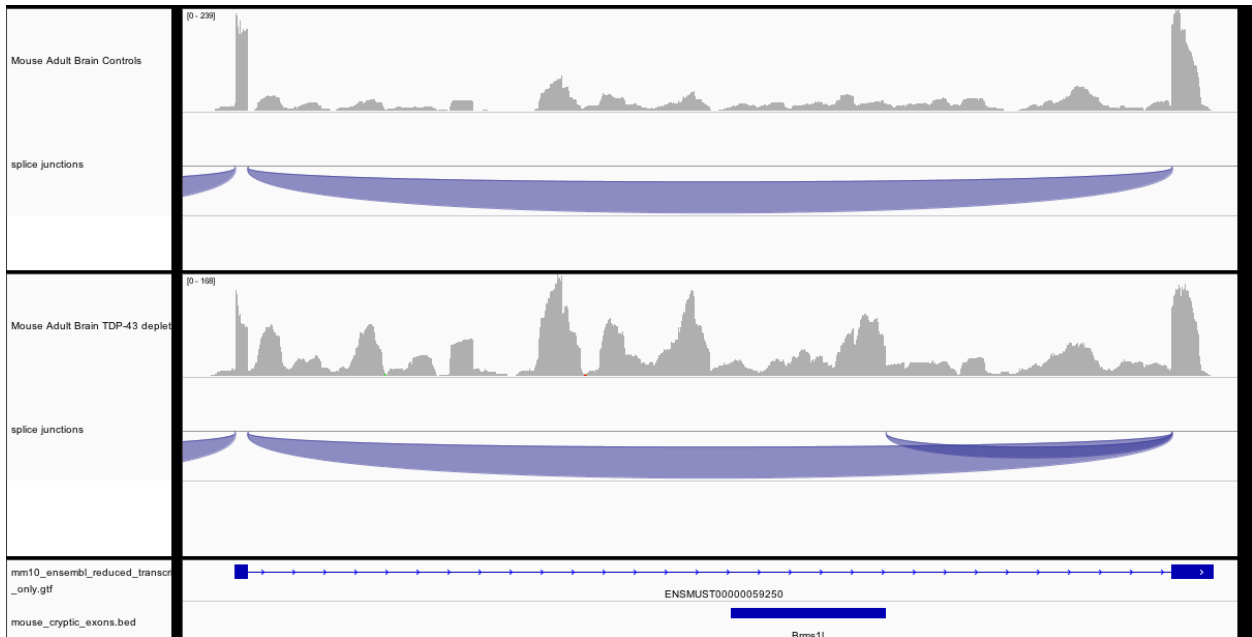

## Mouse Embryonic Stem Cells

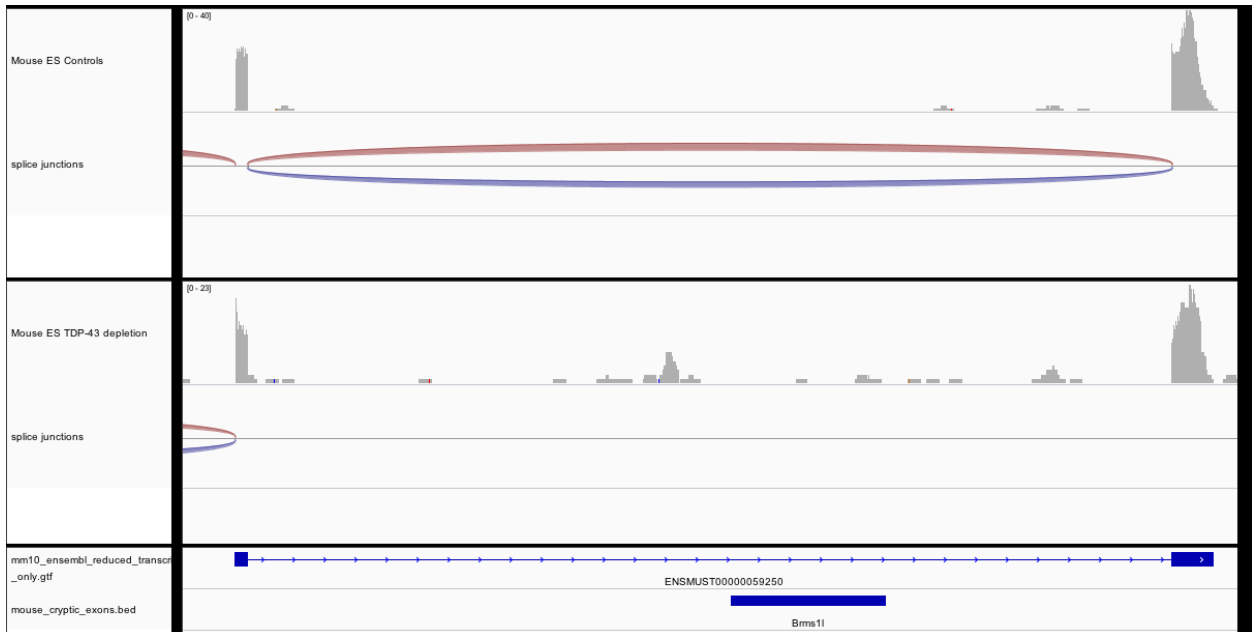

# 15 Cacna1b E050i1

## Mouse Adult Brain

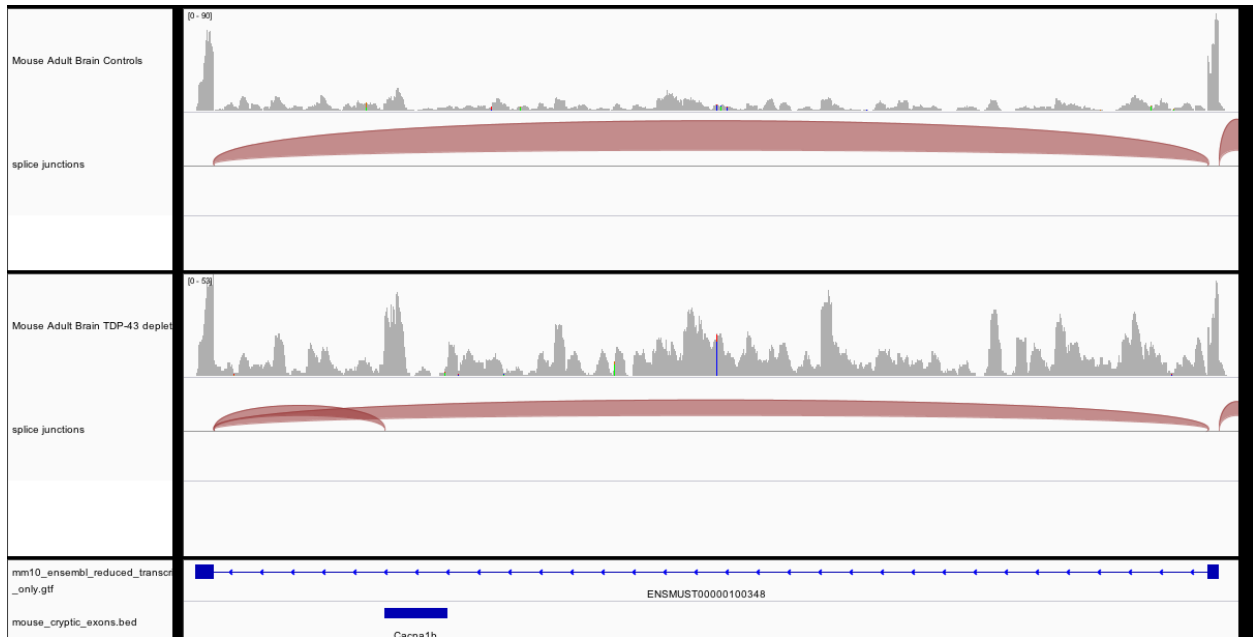

## Mouse Embryonic Stem Cells

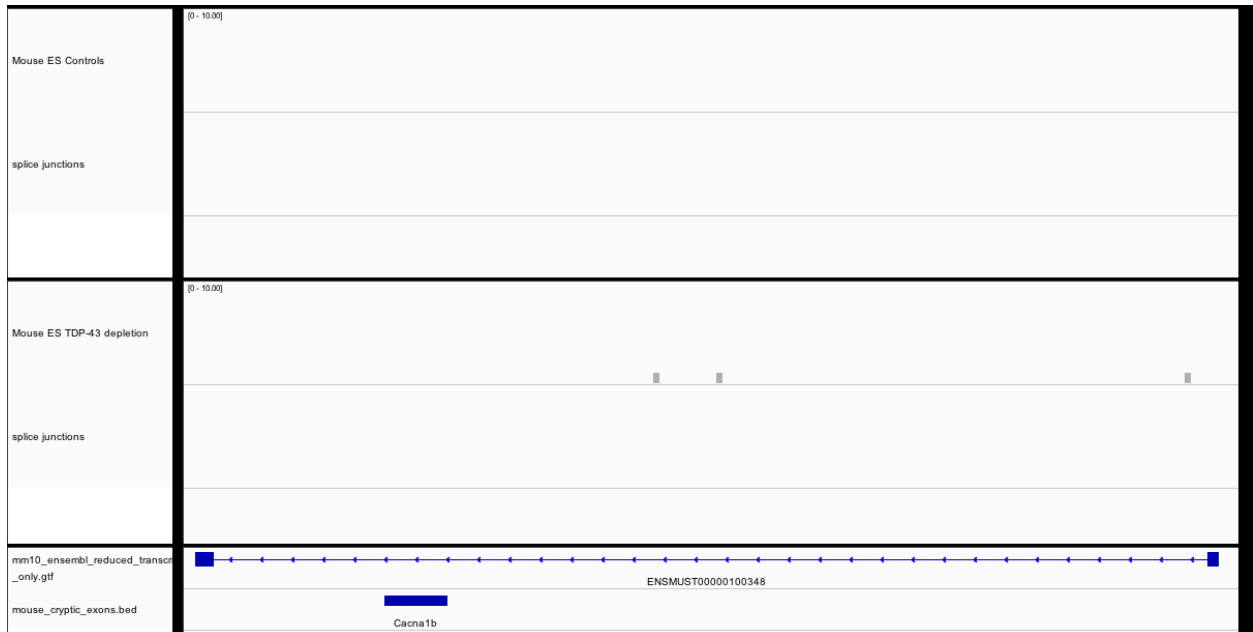



# 16 Nt5c3b E010i1

## Mouse Adult Brain

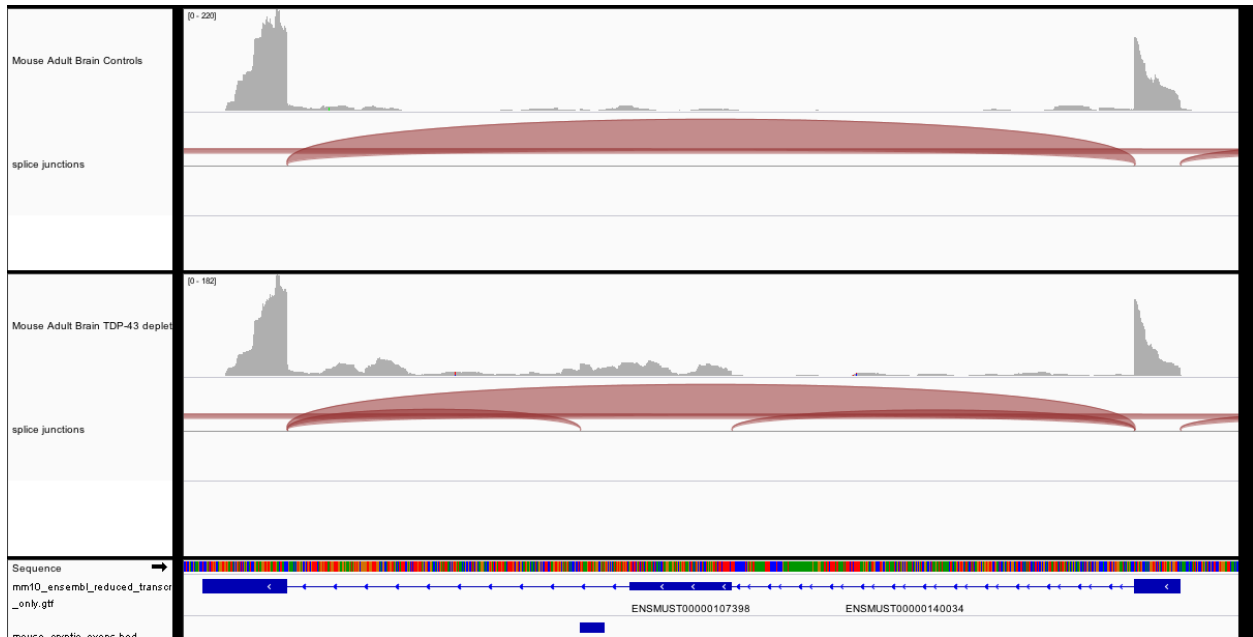

## Mouse Embryonic Stem Cells

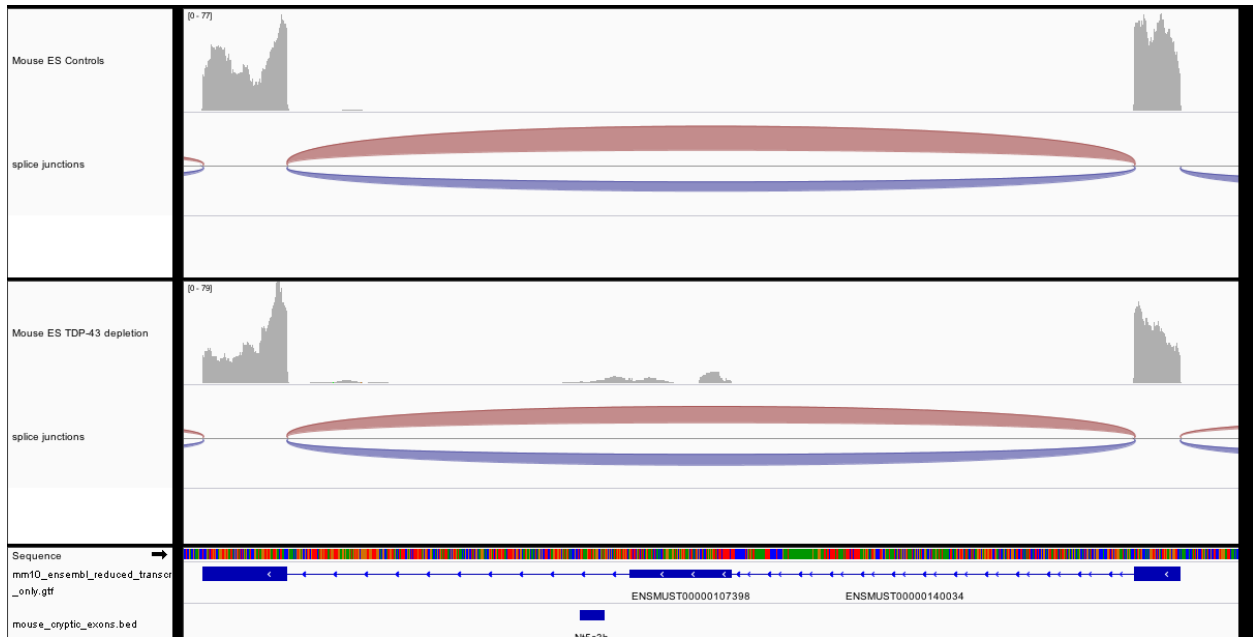

# 17 Spcs2 E004i1

## Mouse Adult Brain

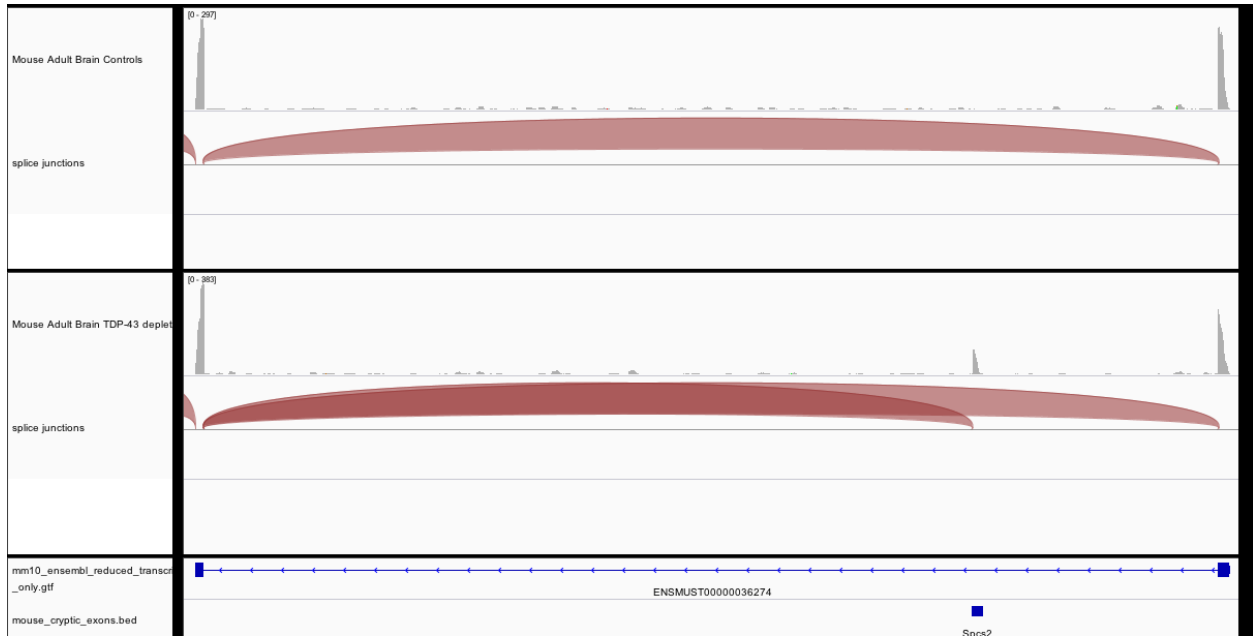

## Mouse Embryonic Stem Cells

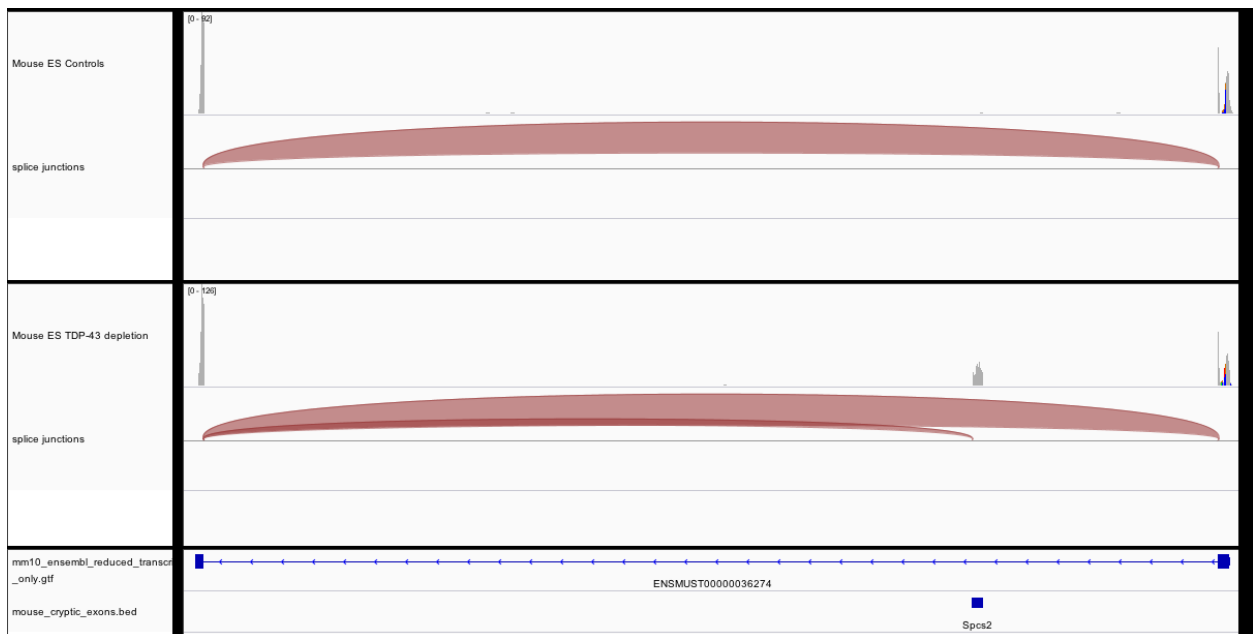

# 18 Ccdc88a E004i8

## Mouse Adult Brain

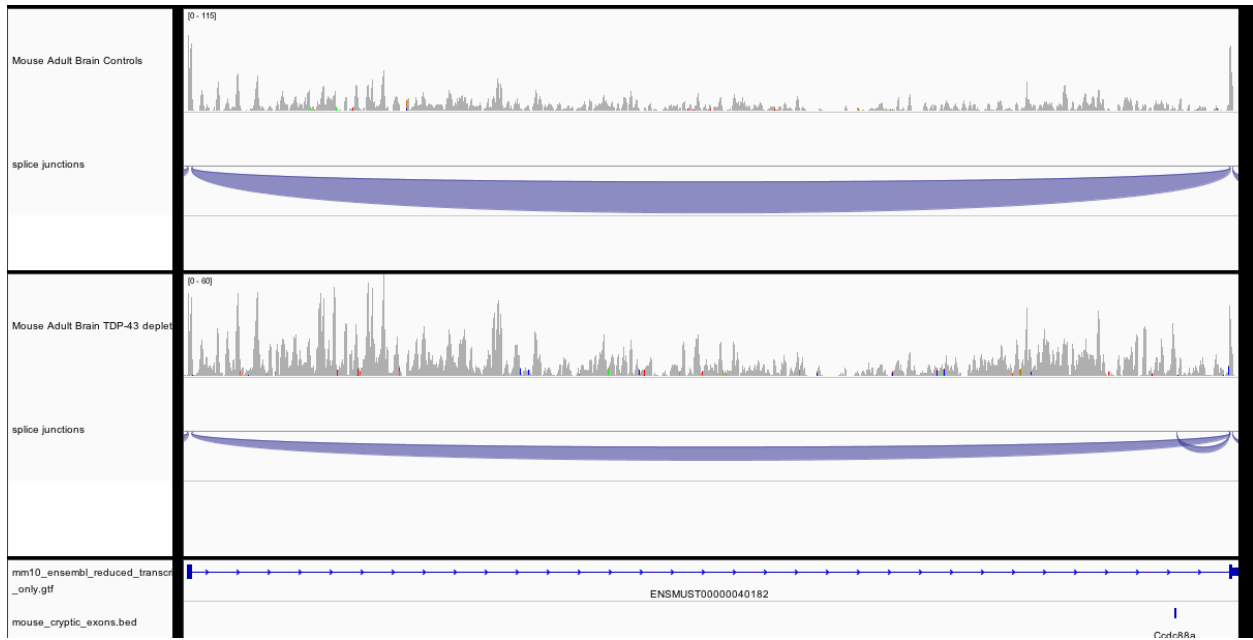

## Mouse Embryonic Stem Cells

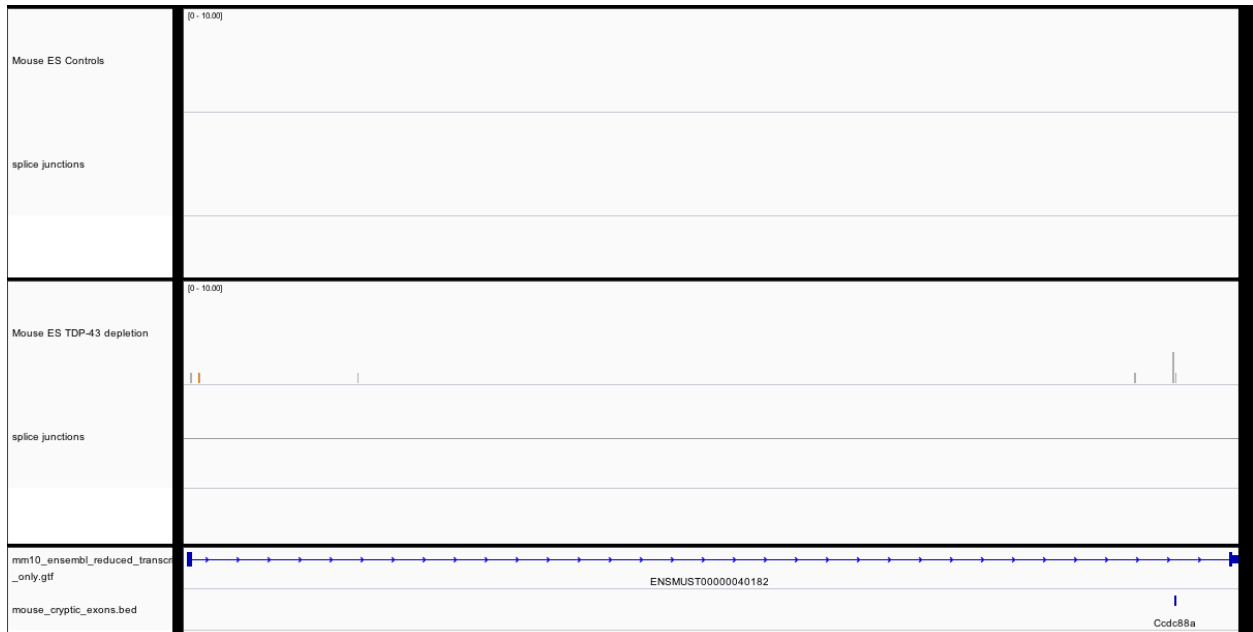

# 19 Adap1 E014i3

## Mouse Adult Brain

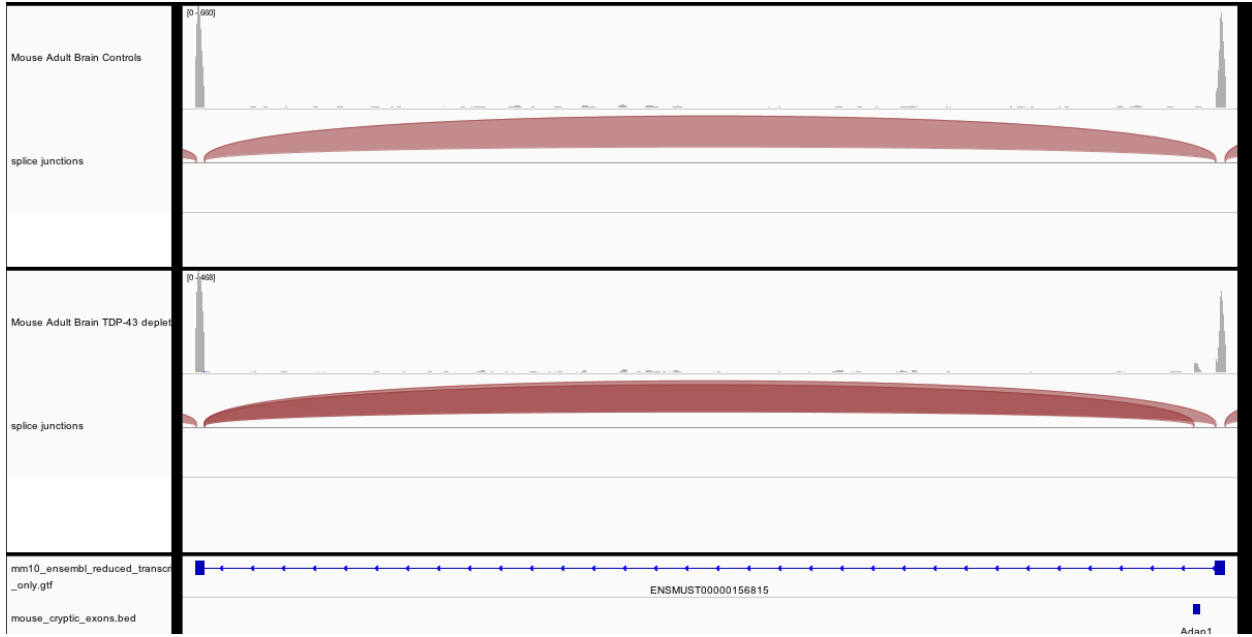

## Mouse Embryonic Stem Cells

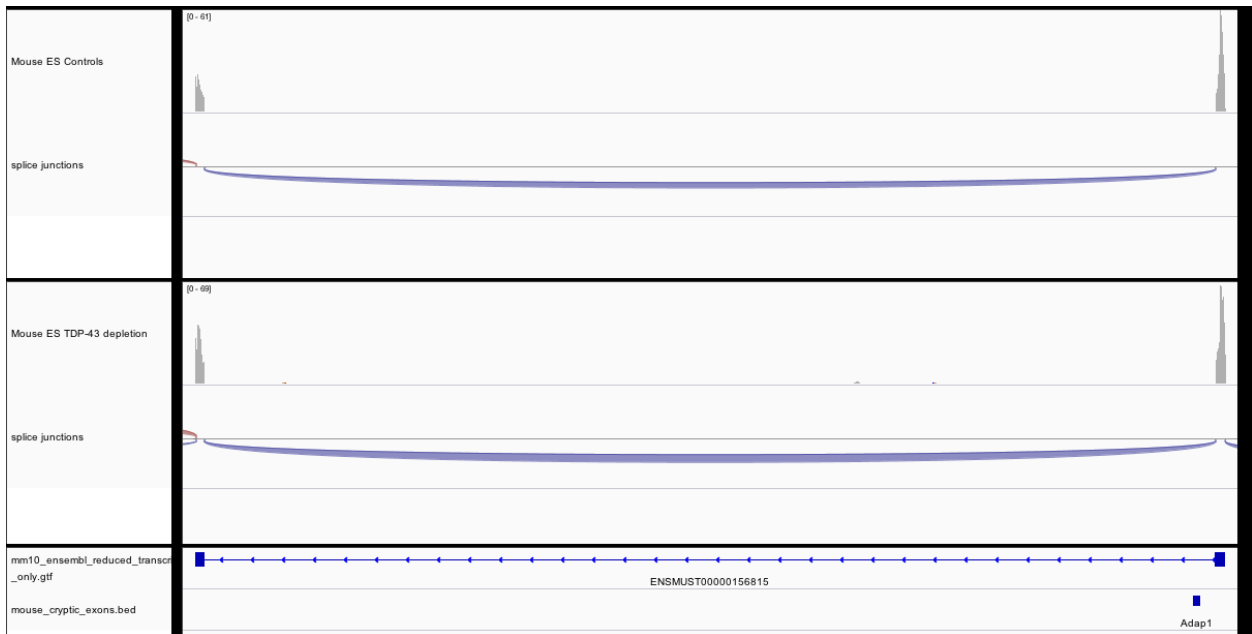

# 20 Ap3b2 E031i2

## Mouse Adult Brain

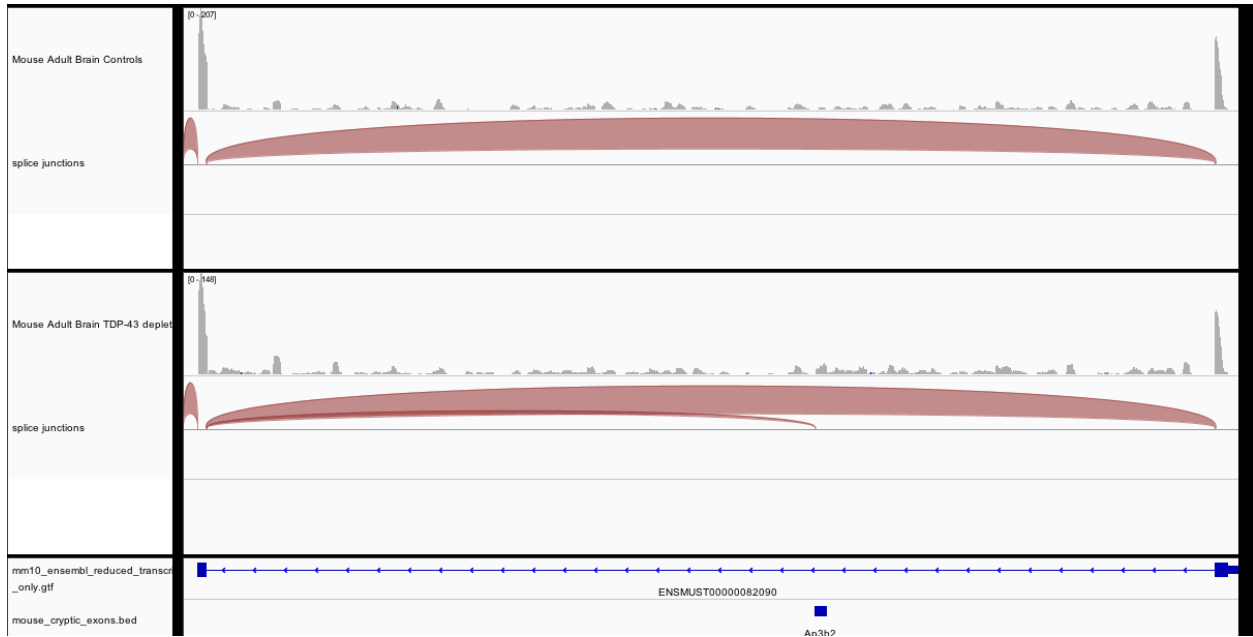

## Mouse Embryonic Stem Cells

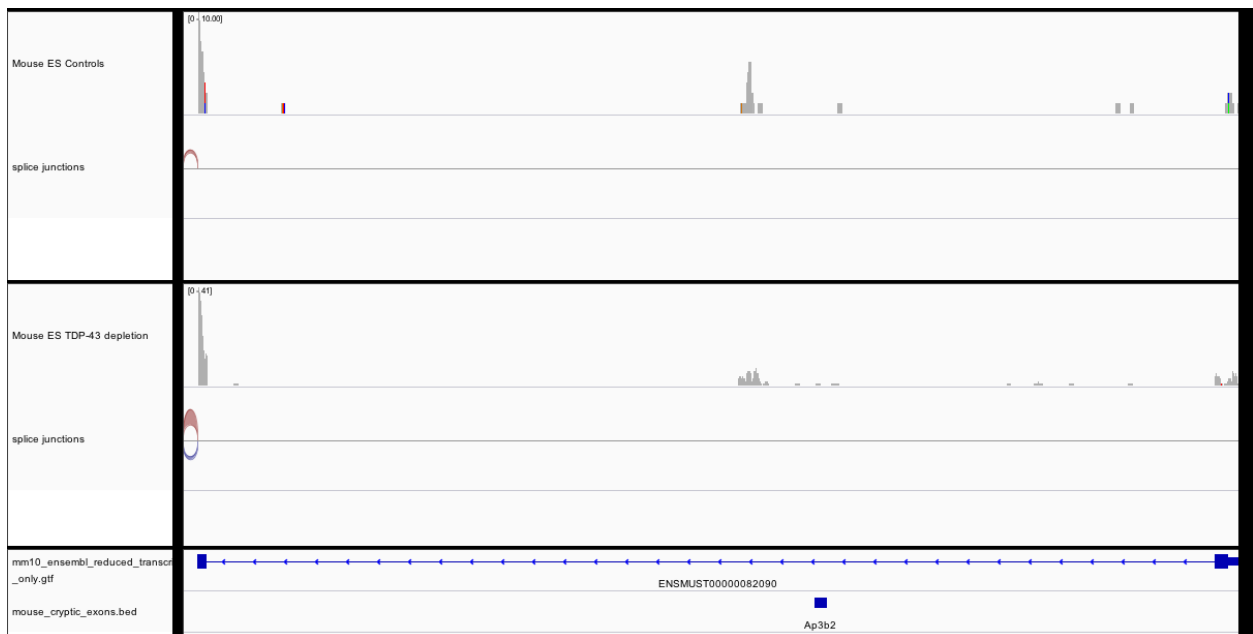

# 21 Fam73a E015i2

## Mouse Adult Brain

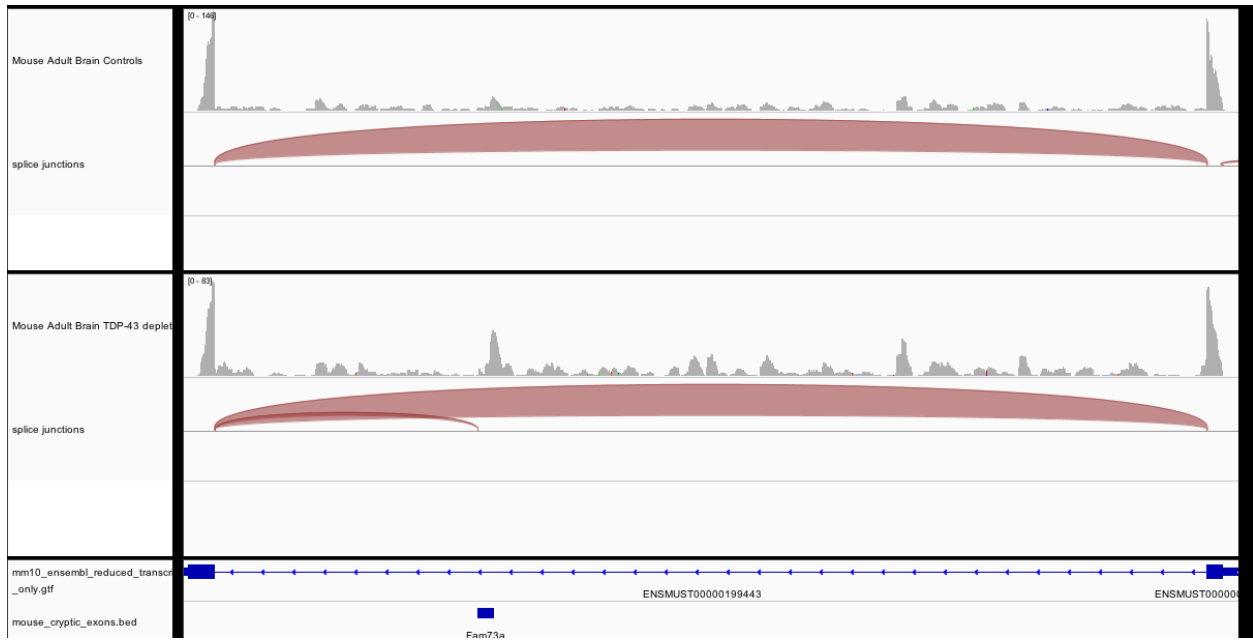

## Mouse Embryonic Stem Cells

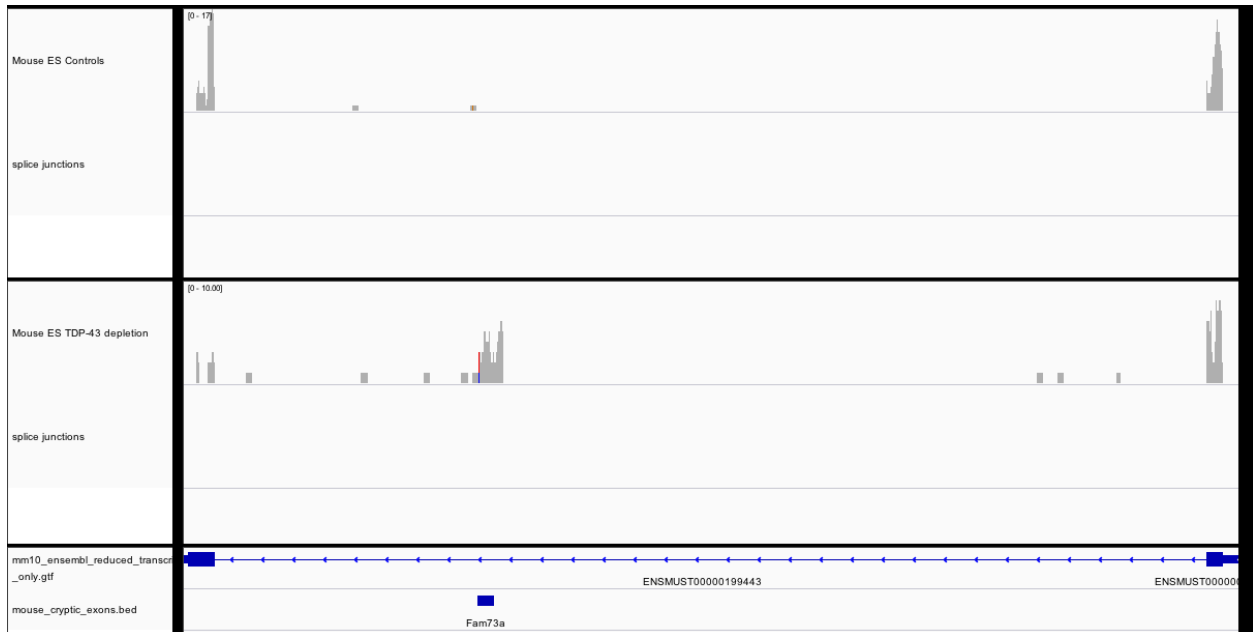

# 22 Ptpn2 E019i11

## Mouse Adult Brain

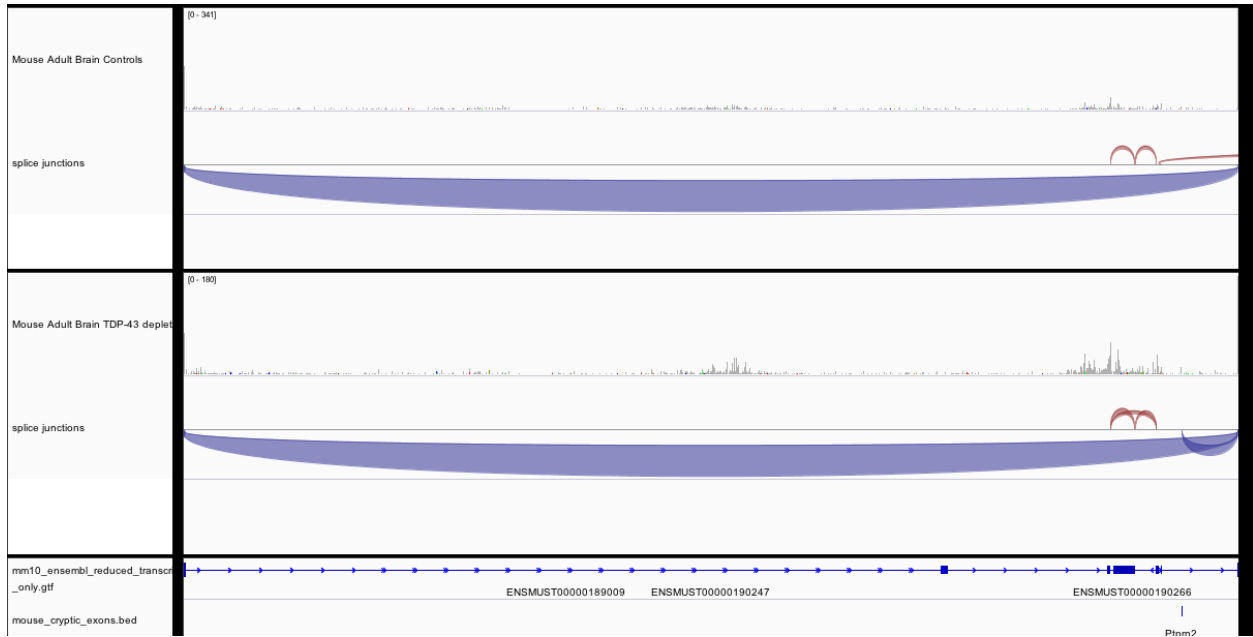

## Mouse Embryonic Stem Cells

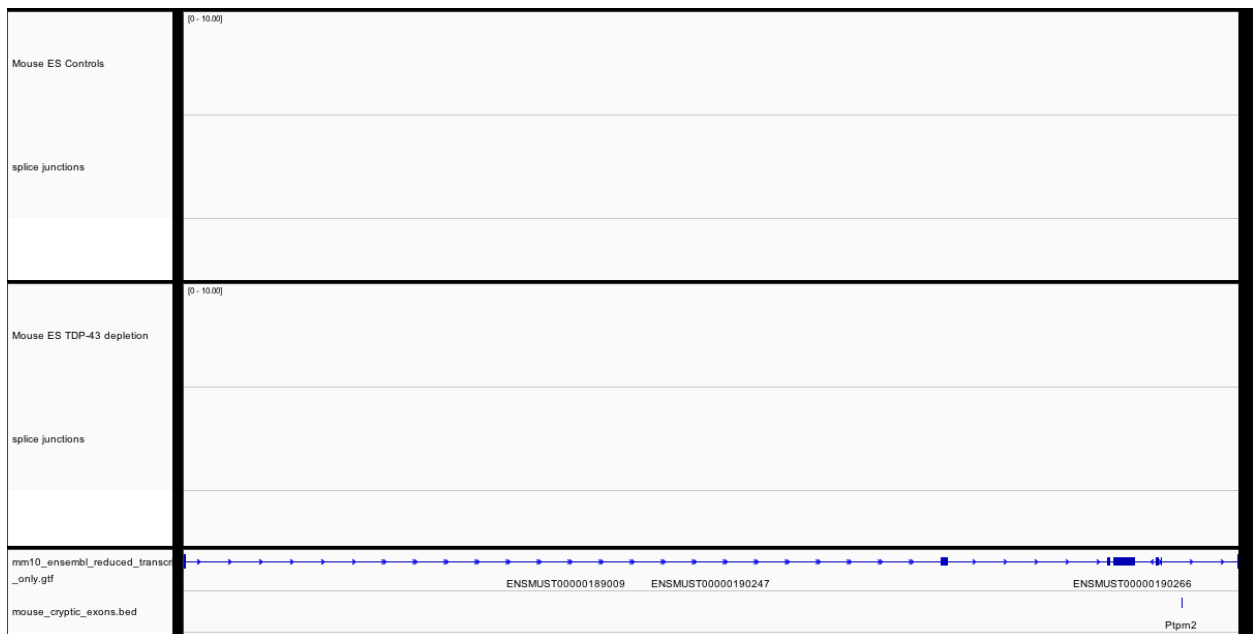

# 23 Dlg2 E004i17

## Mouse Adult Brain

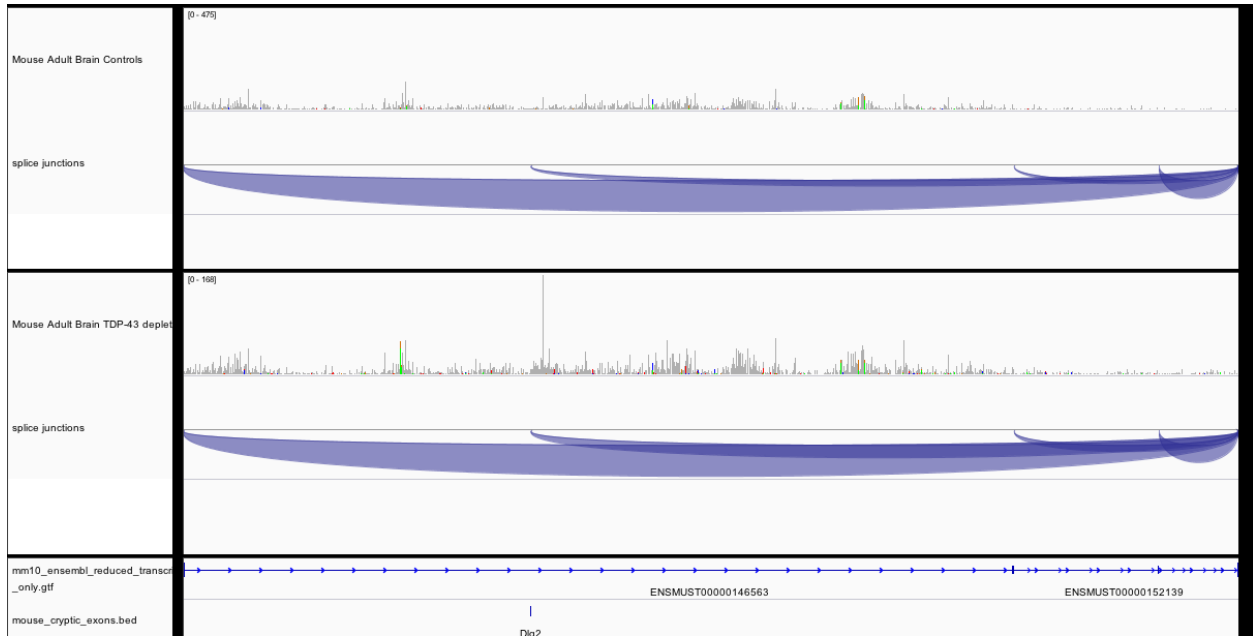

## Mouse Embryonic Stem Cells

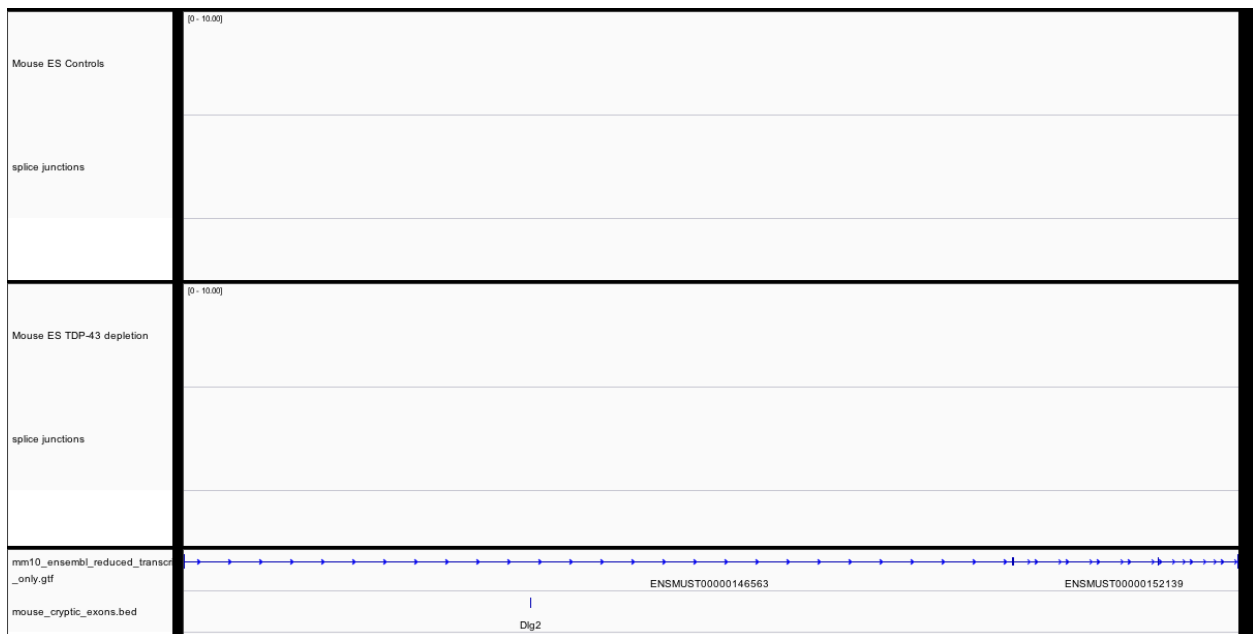



# 24 Cd200 E003i1

## Mouse Adult Brain

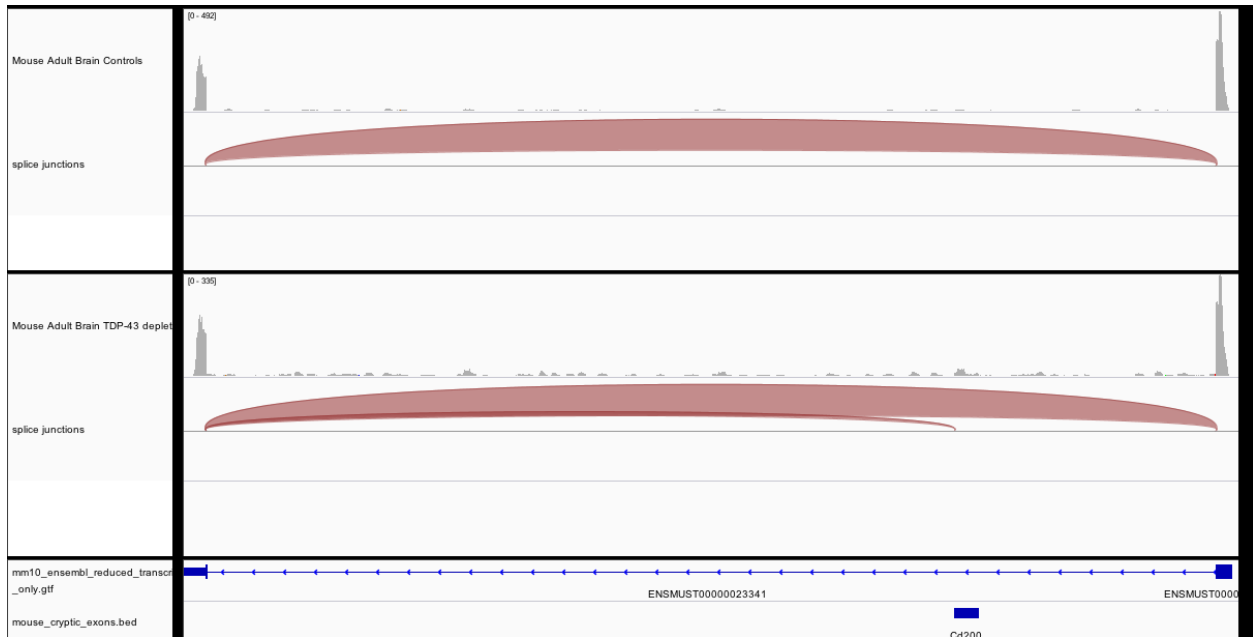

## Mouse Embryonic Stem Cells

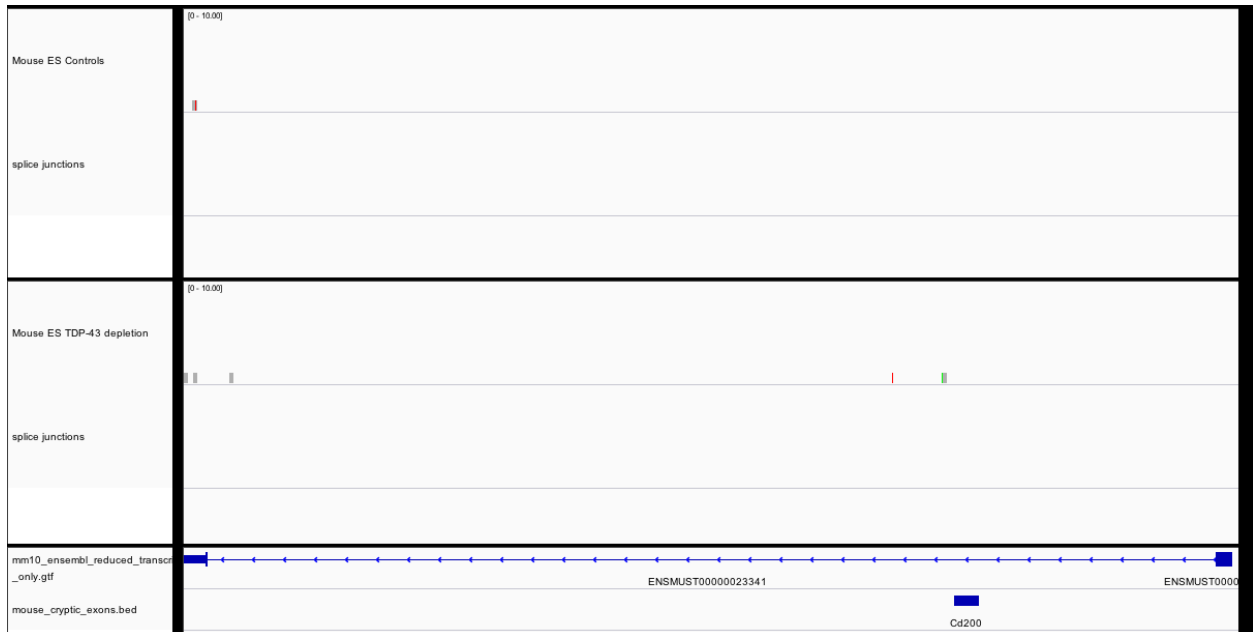

# 25 Dock4 E049i1

## Mouse Adult Brain

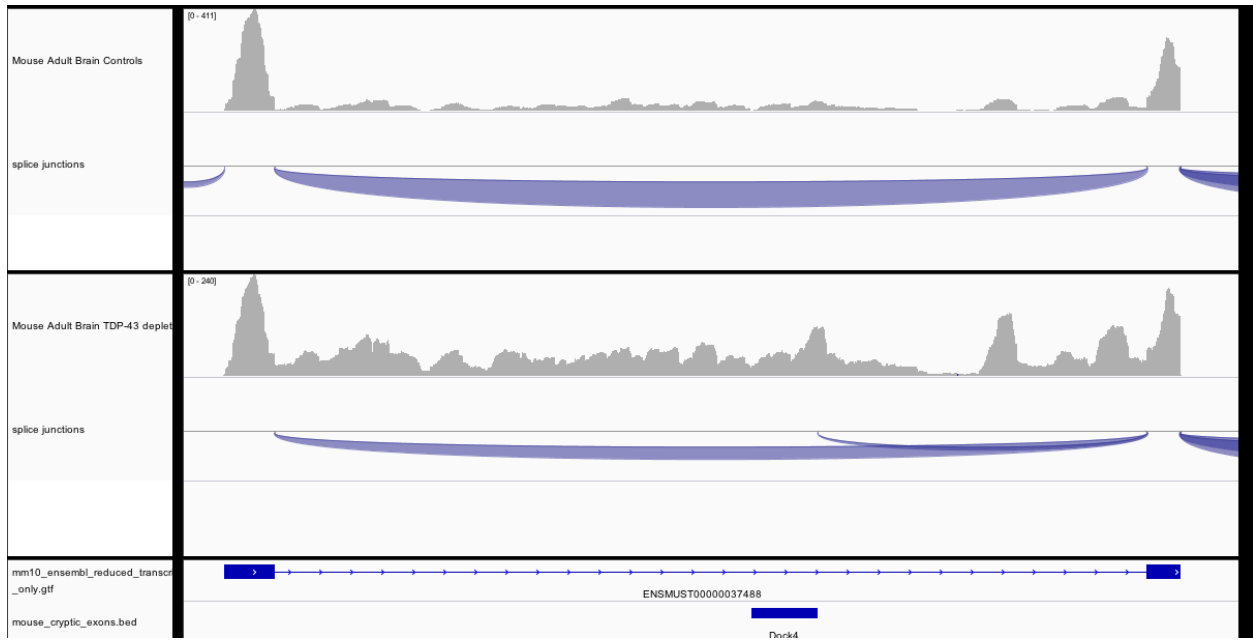

## Mouse Embryonic Stem Cells

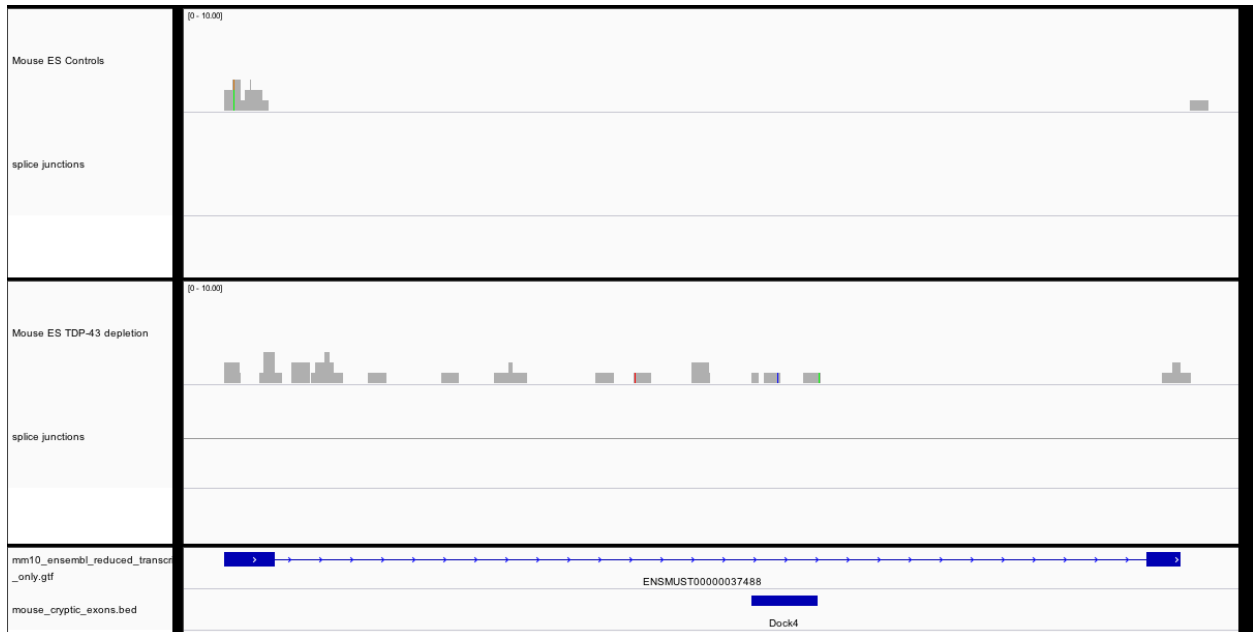

# 26 C4b E032i1

## Mouse Adult Brain

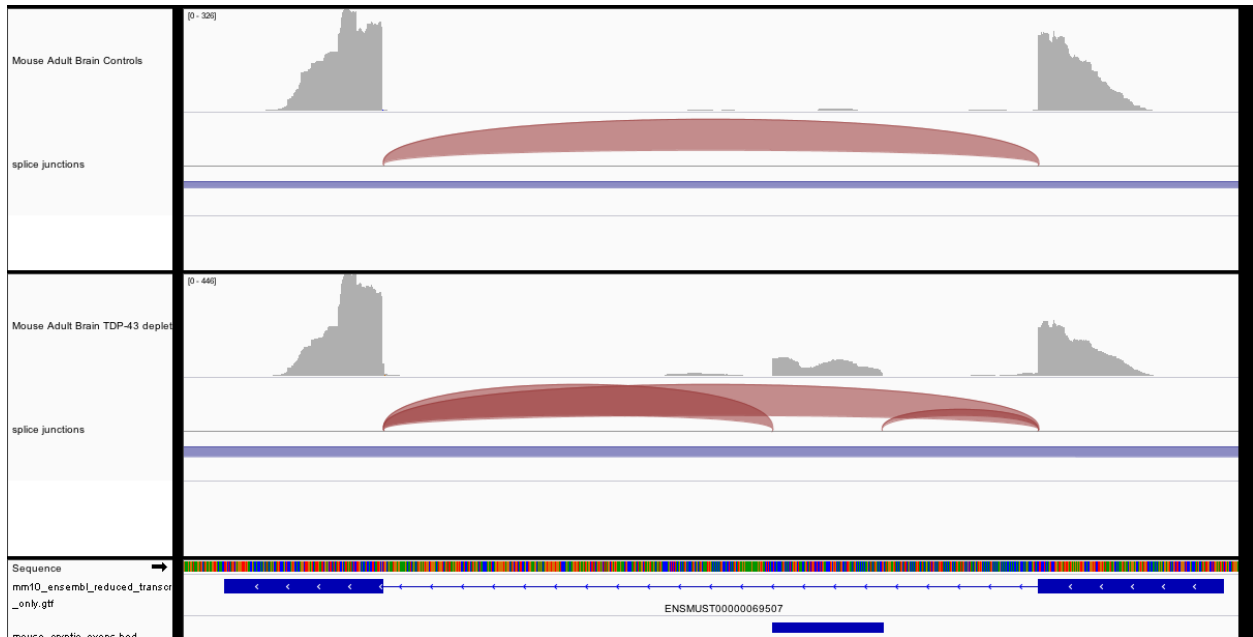

## Mouse Embryonic Stem Cells

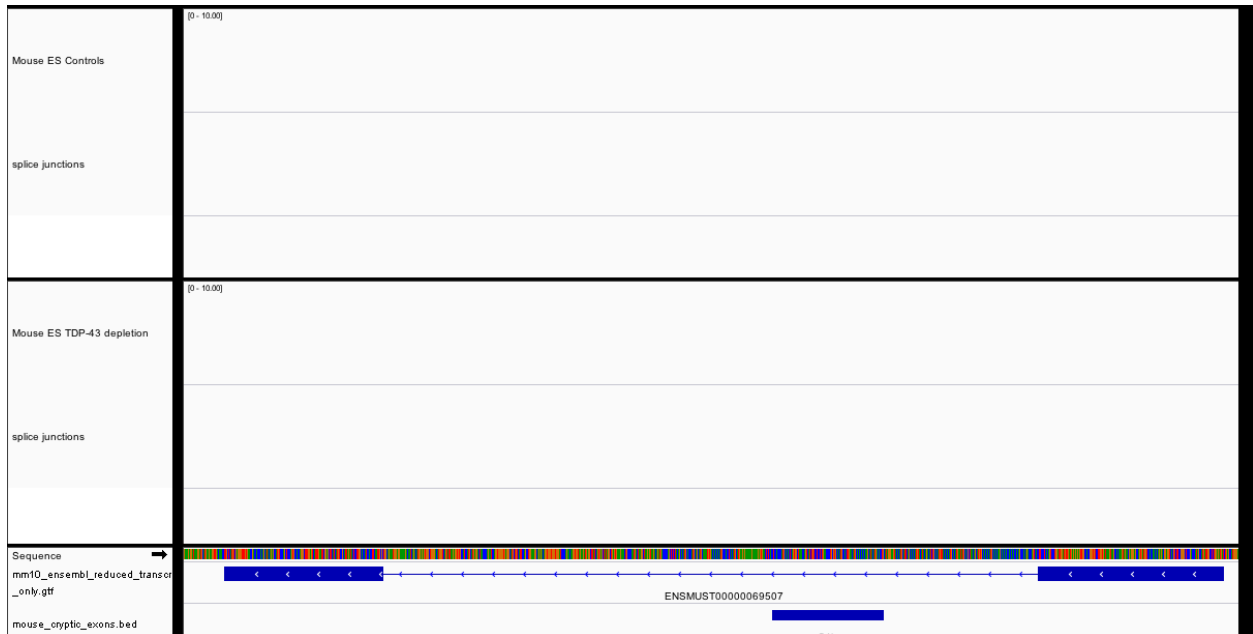

# 27 Camk1g E017i2

## Mouse Adult Brain

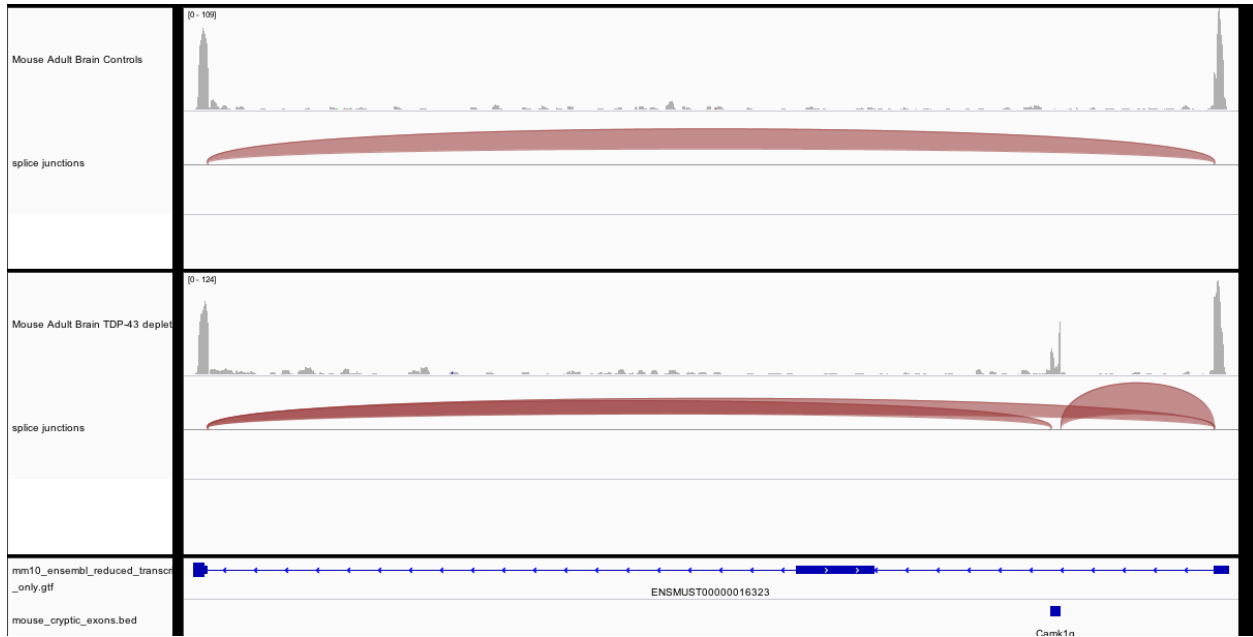

## Mouse Embryonic Stem Cells

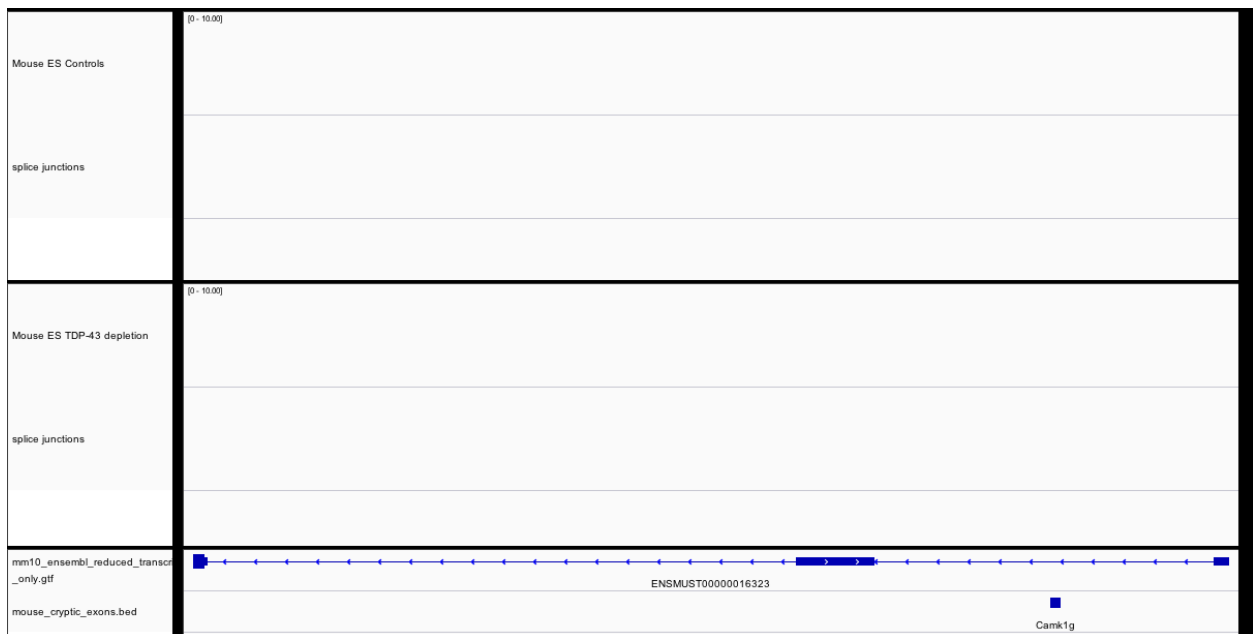

# 28 Reep3 E001i1

## Mouse Adult Brain

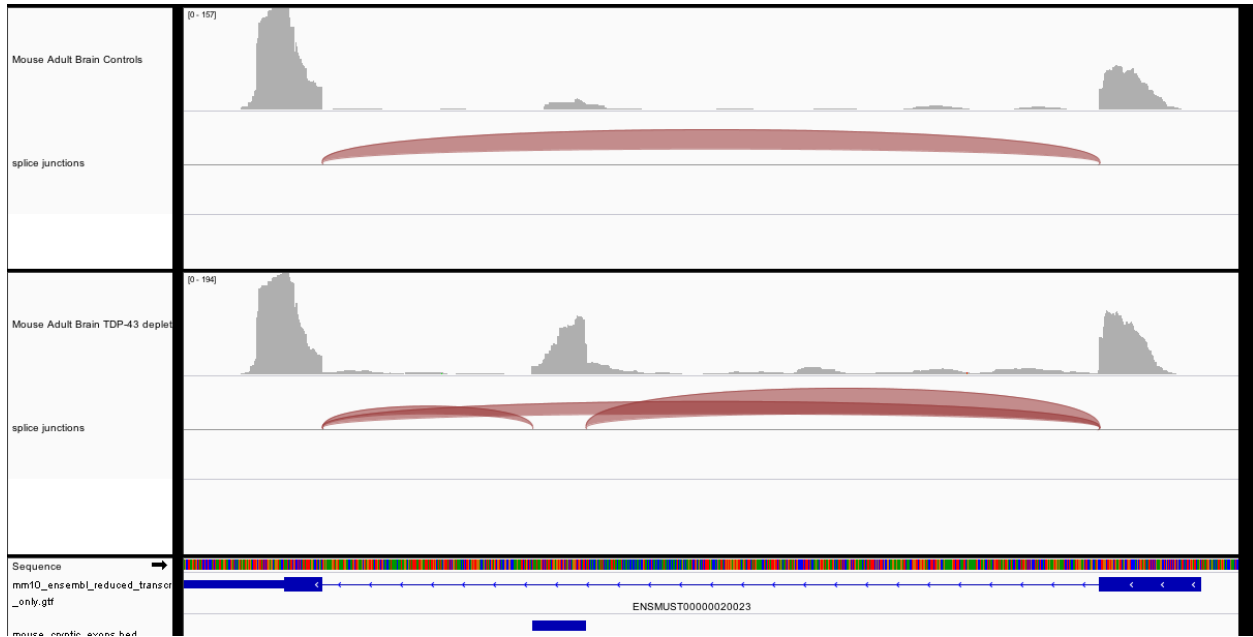

## Mouse Embryonic Stem Cells

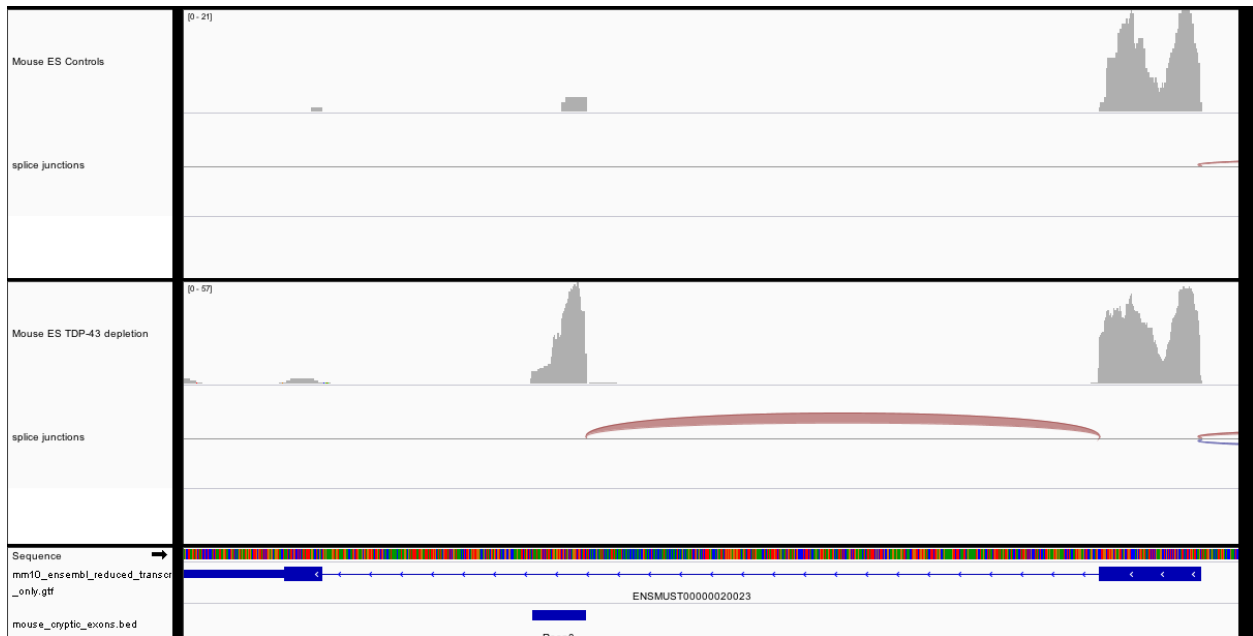

# 29 Drosha E009i1

## Mouse Adult Brain

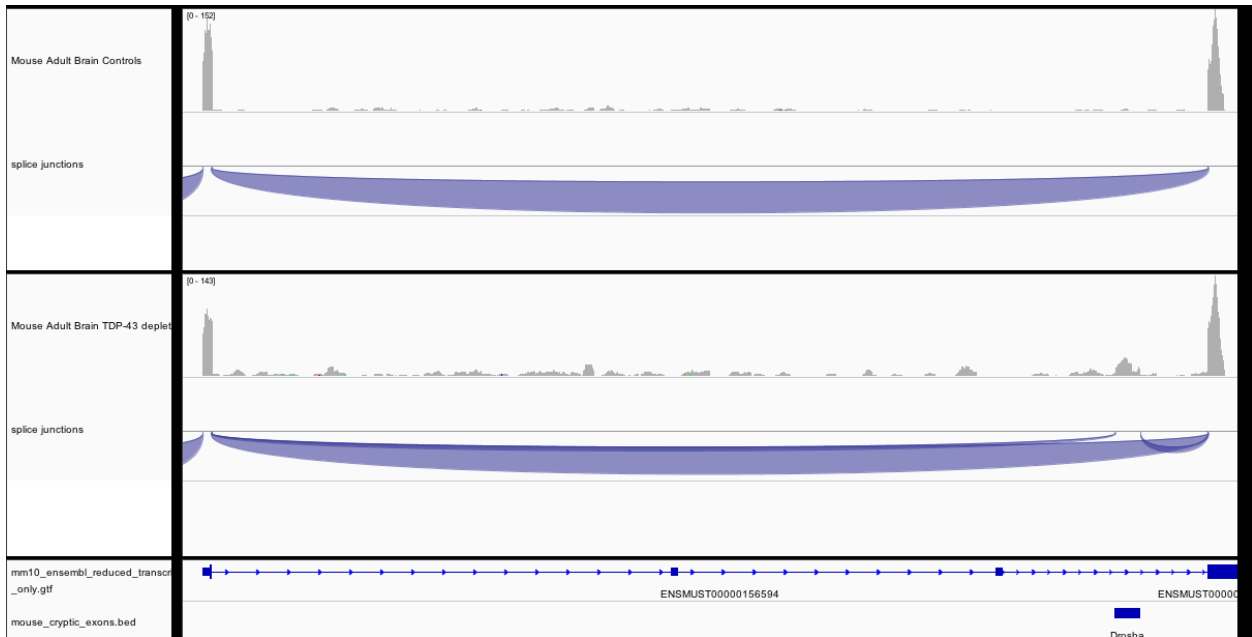

## Mouse Embryonic Stem Cells

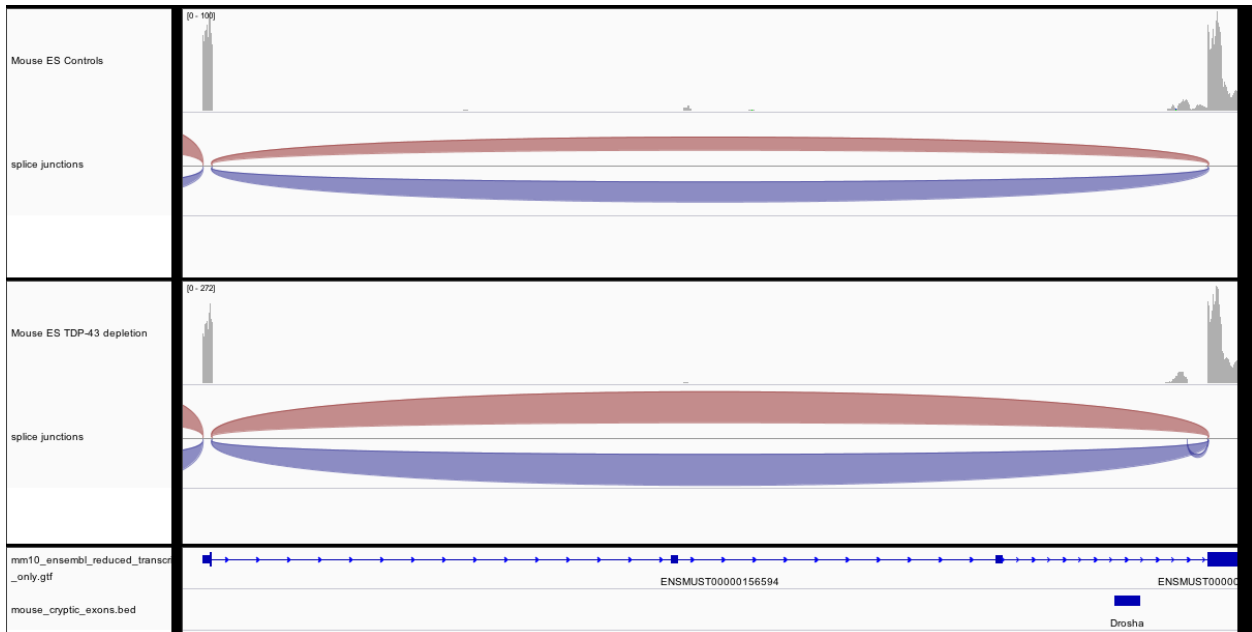

# 30 Synj2bp+Gm20498 E036i2

Mouse Adult Brain

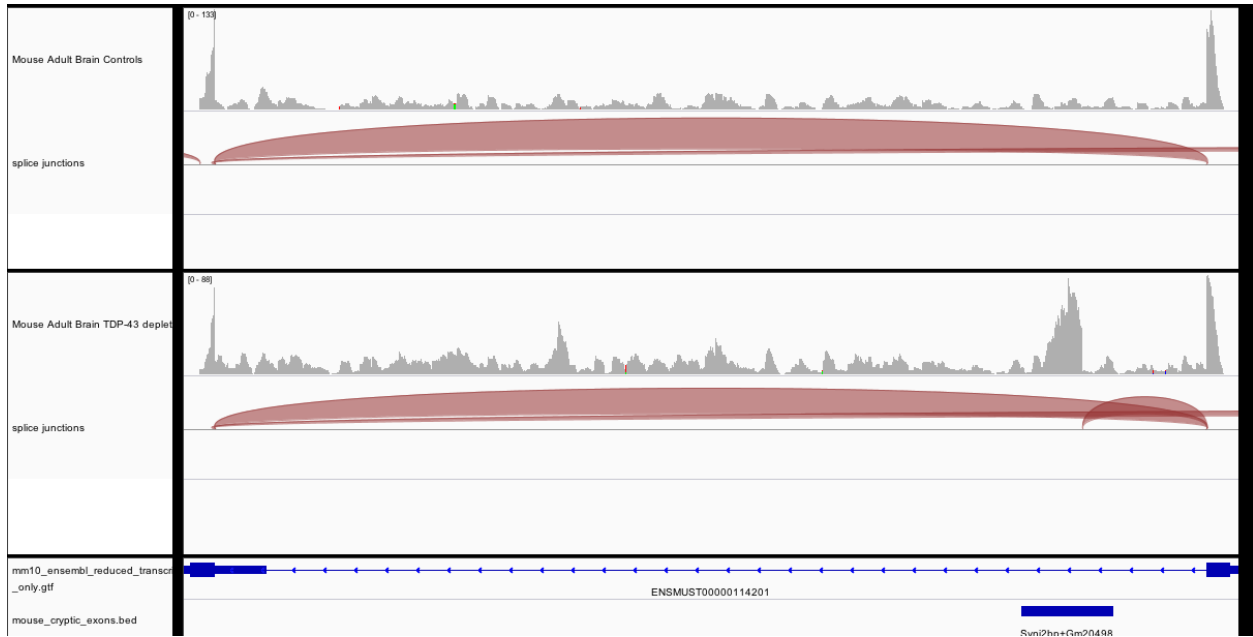

Mouse Embryonic Stem Cells

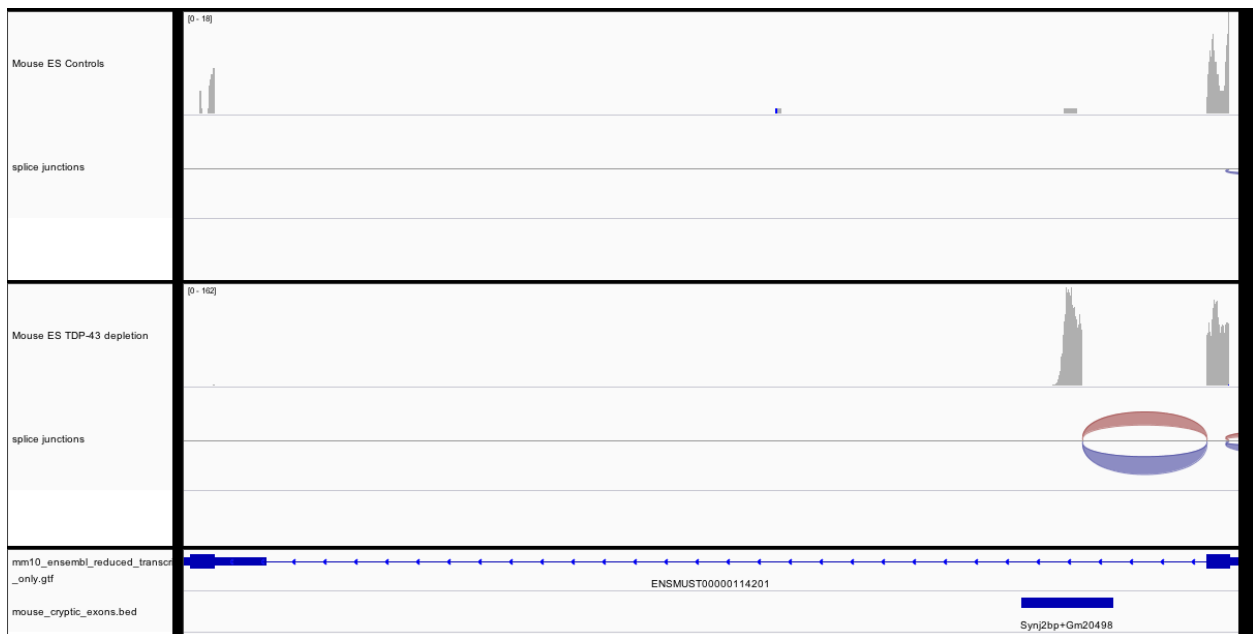

# 31 Adnp2 E002i1

Mouse Adult Brain

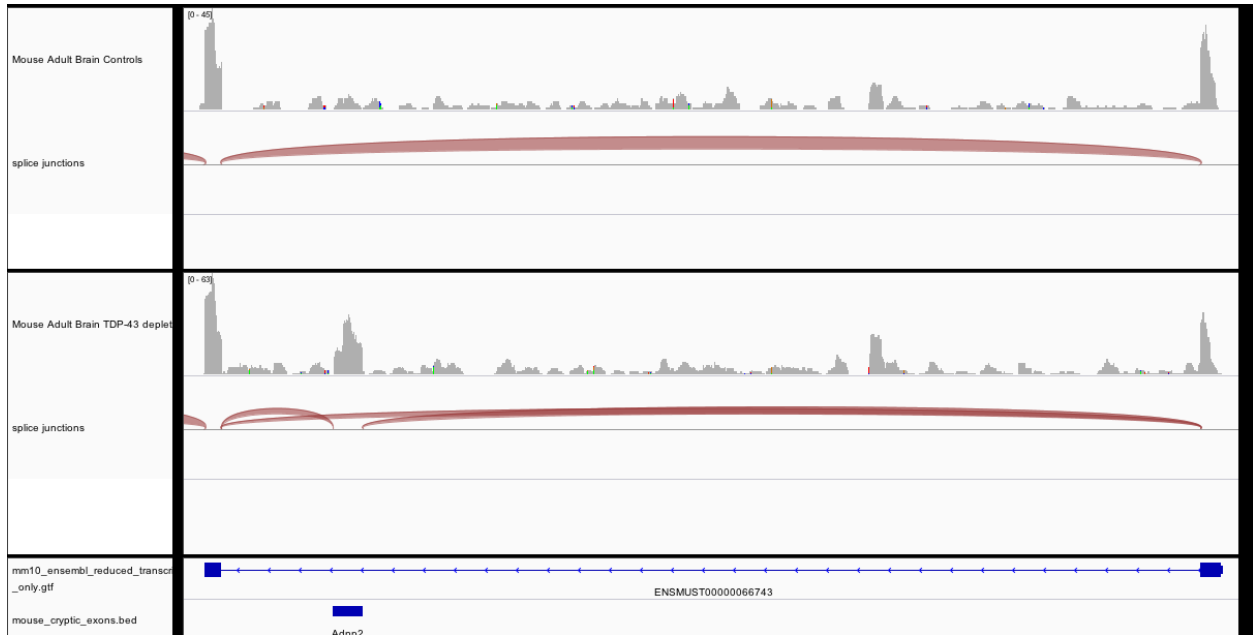

Mouse Embryonic Stem Cells

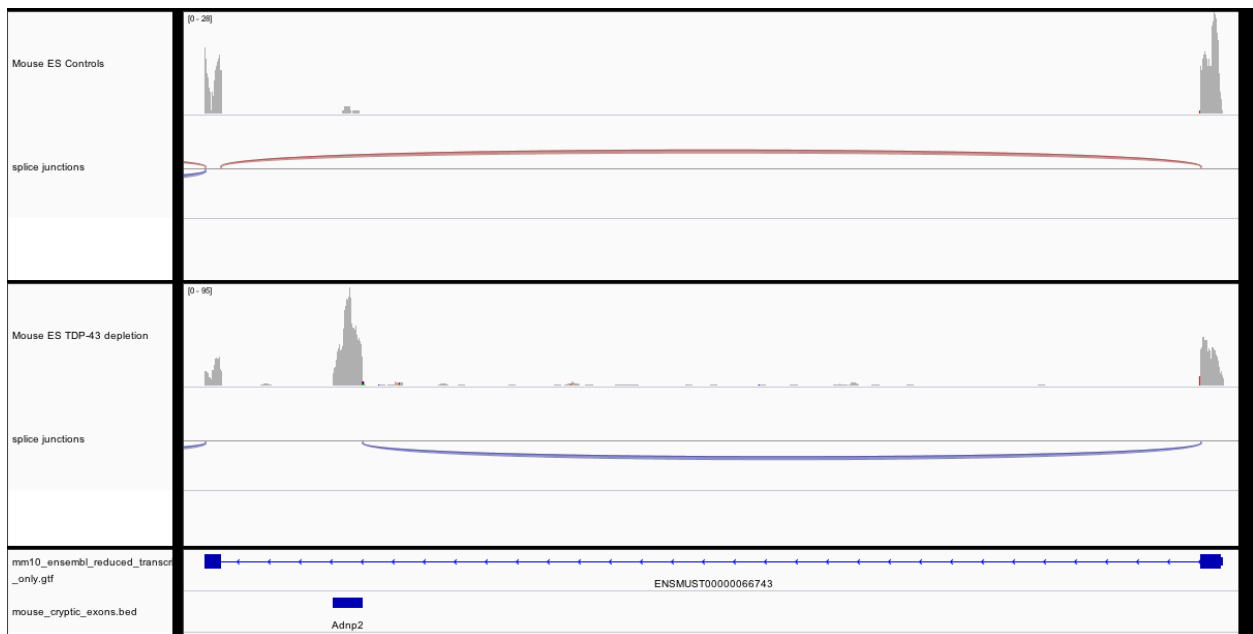



# 32 Adipor2 E010i2

Mouse Adult Brain

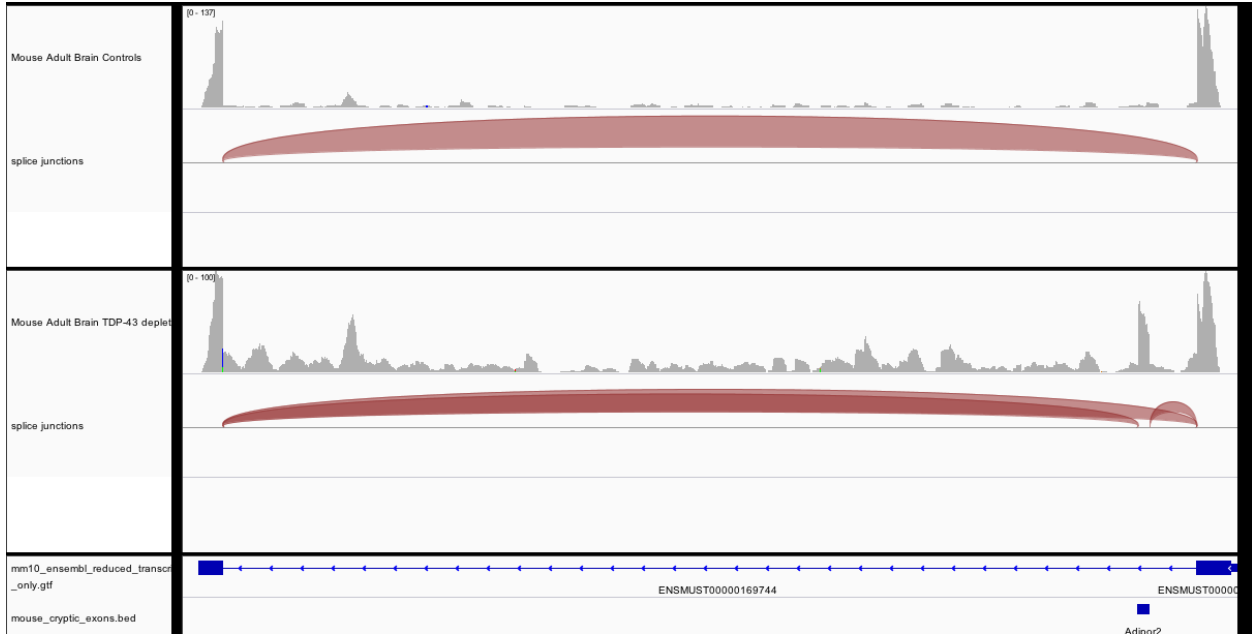

Mouse Embryonic Stem Cells

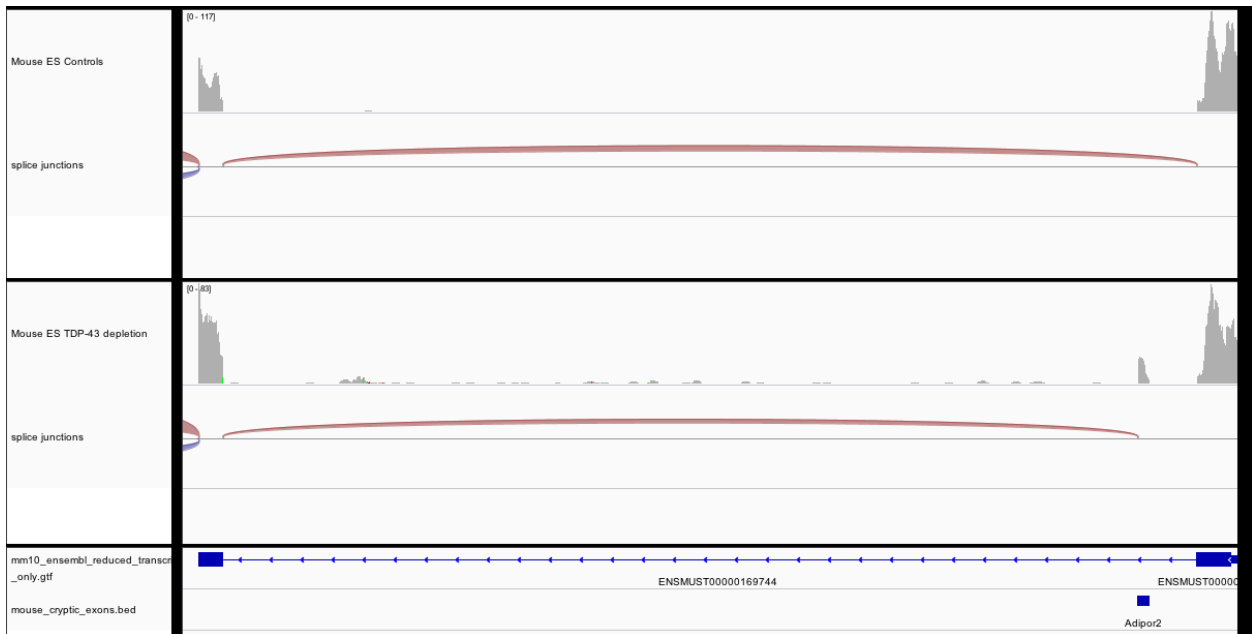

# 33 Cdh22 E013i2

## Mouse Adult Brain

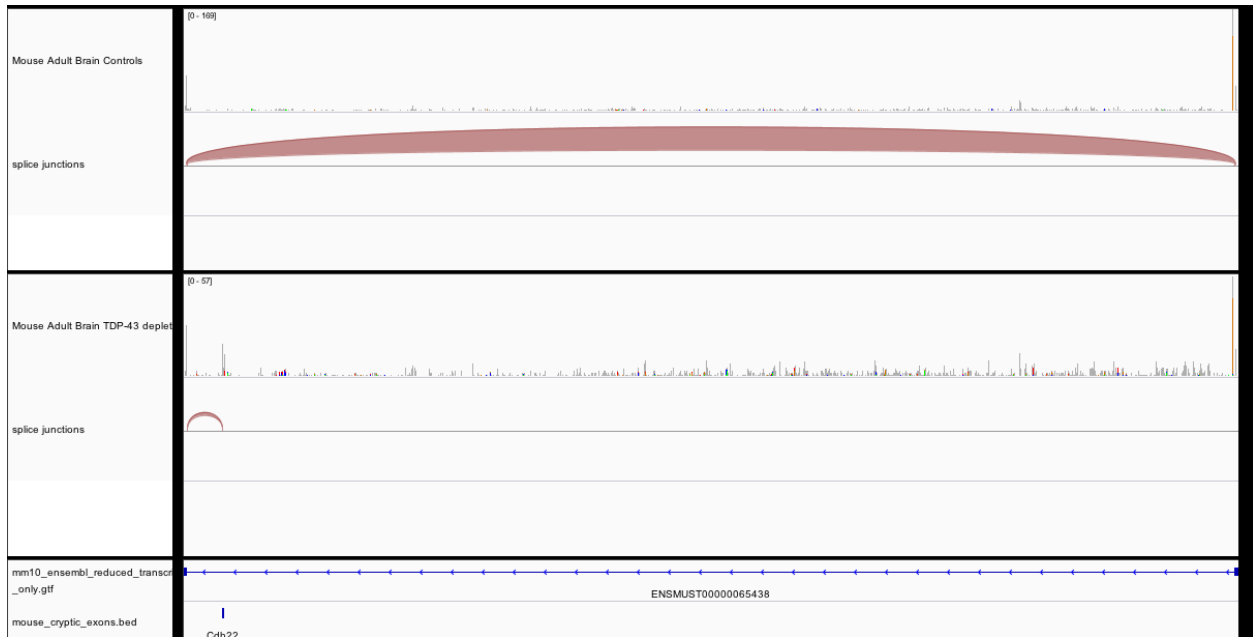

## Mouse Embryonic Stem Cells

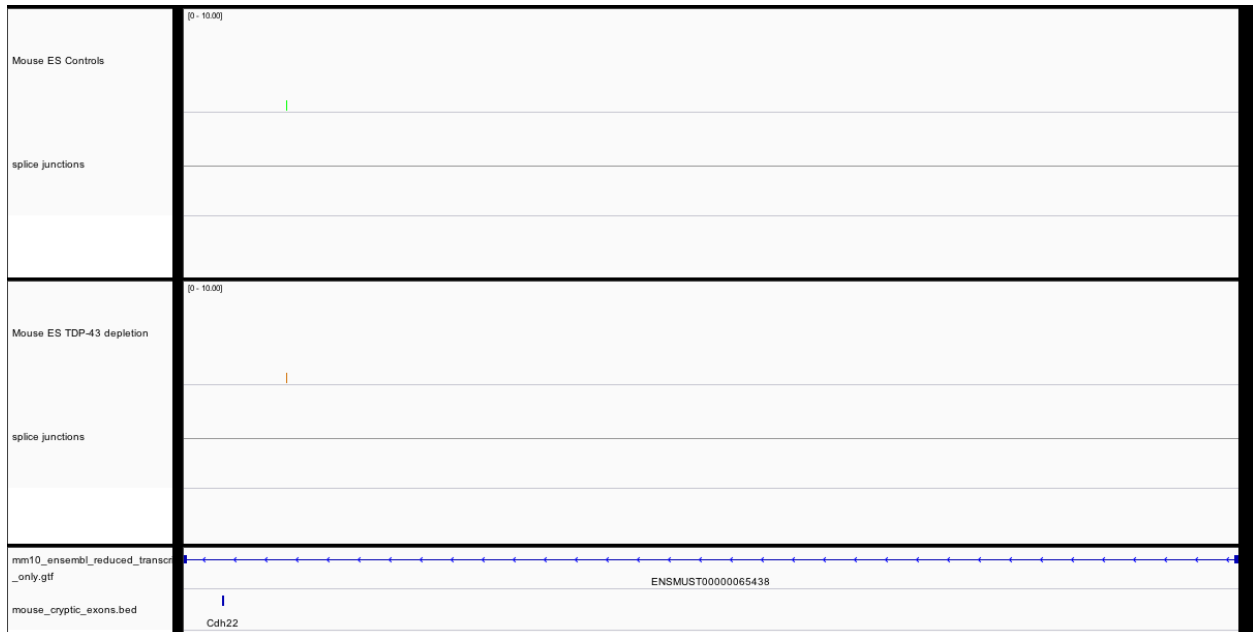

# 34 Ermn E001i1

## Mouse Adult Brain

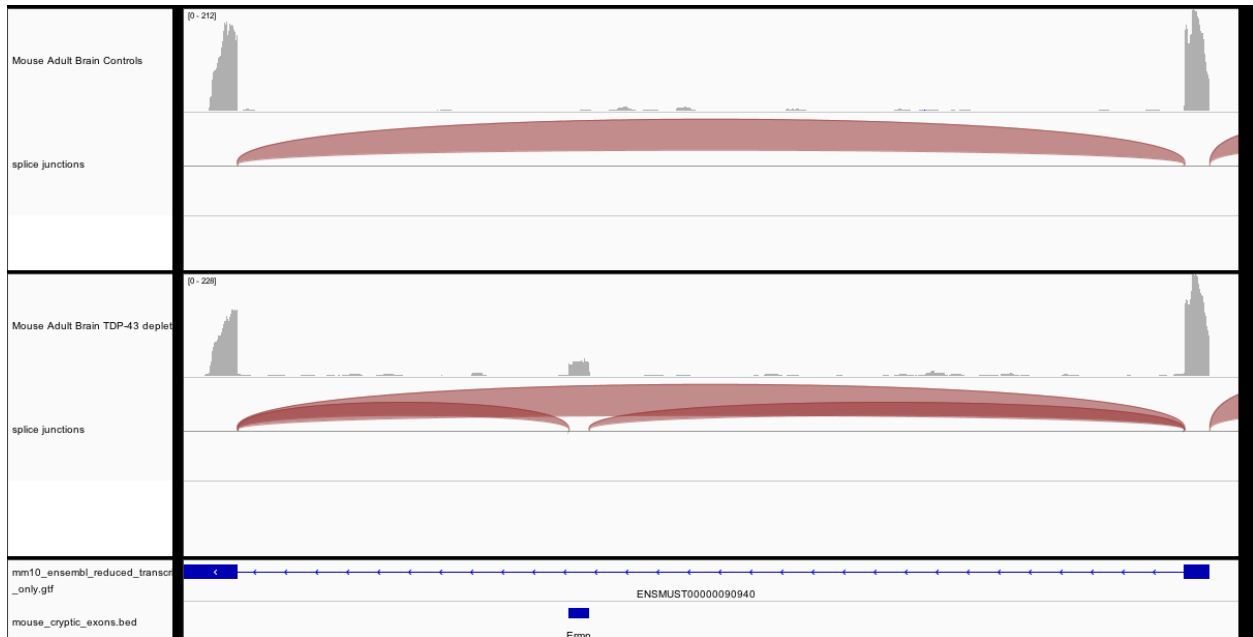

## Mouse Embryonic Stem Cells

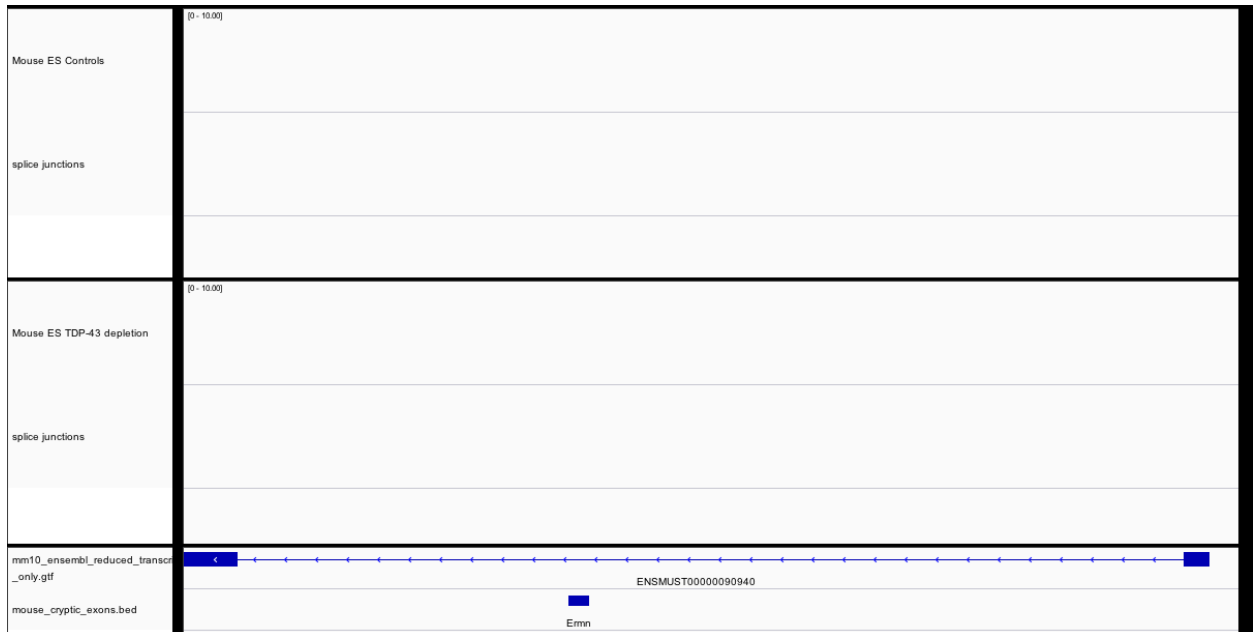

# 35 Ift81 E003i1

## Mouse Adult Brain

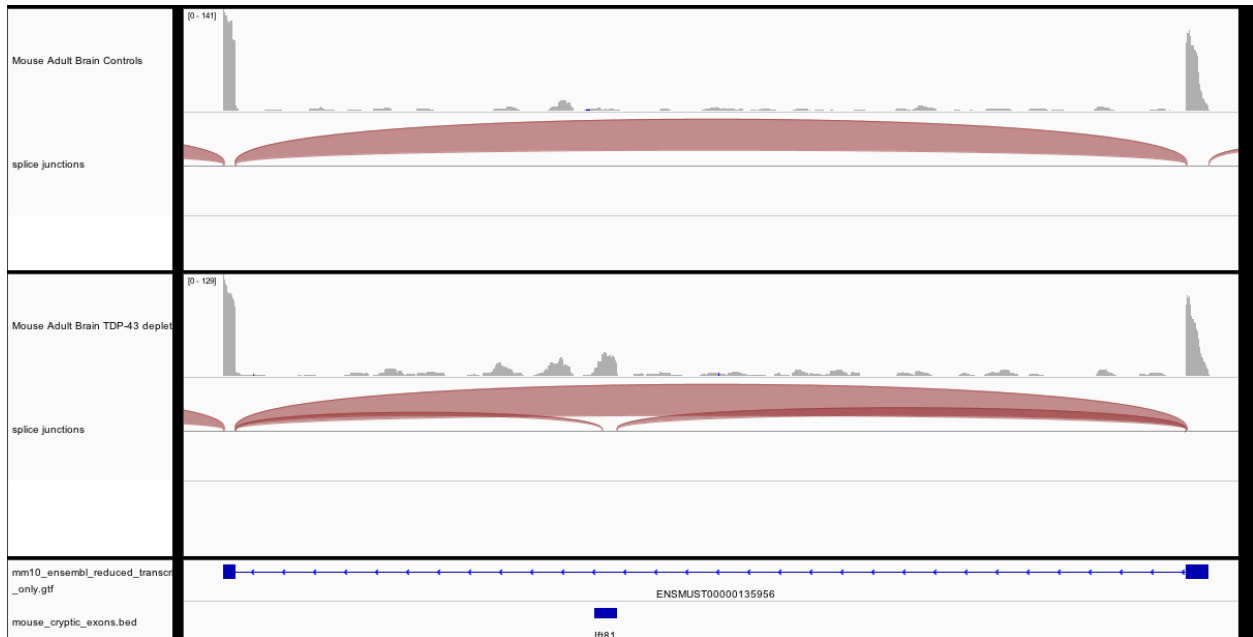

## Mouse Embryonic Stem Cells

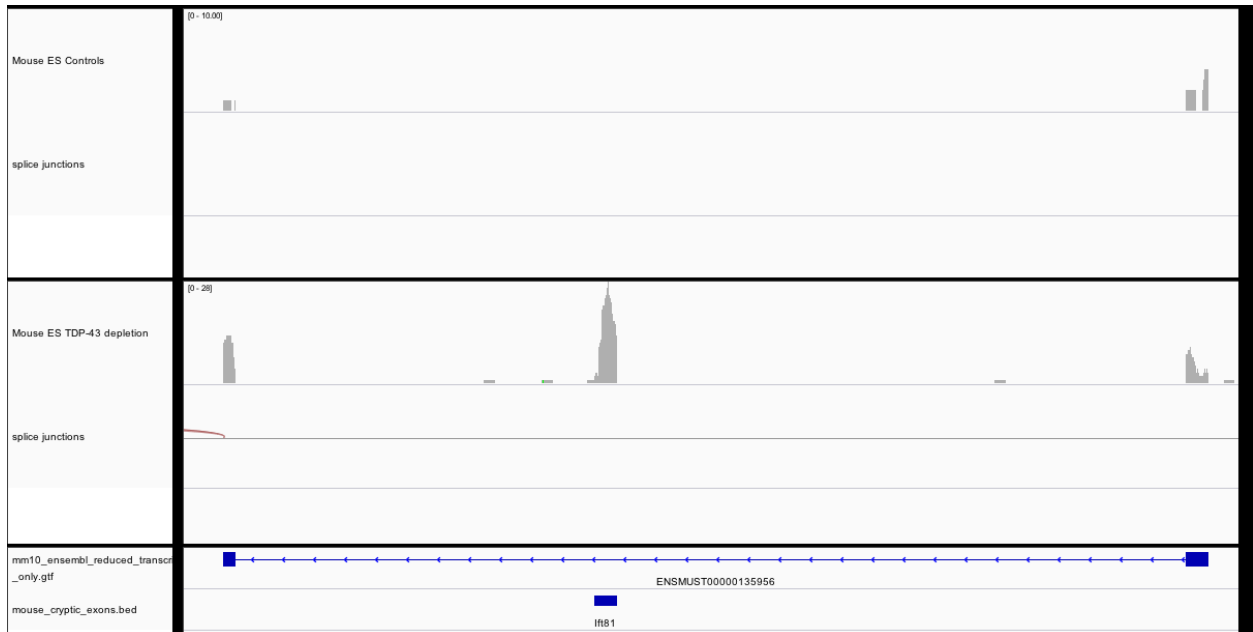

# 36 Vps13d E043i1

## Mouse Adult Brain

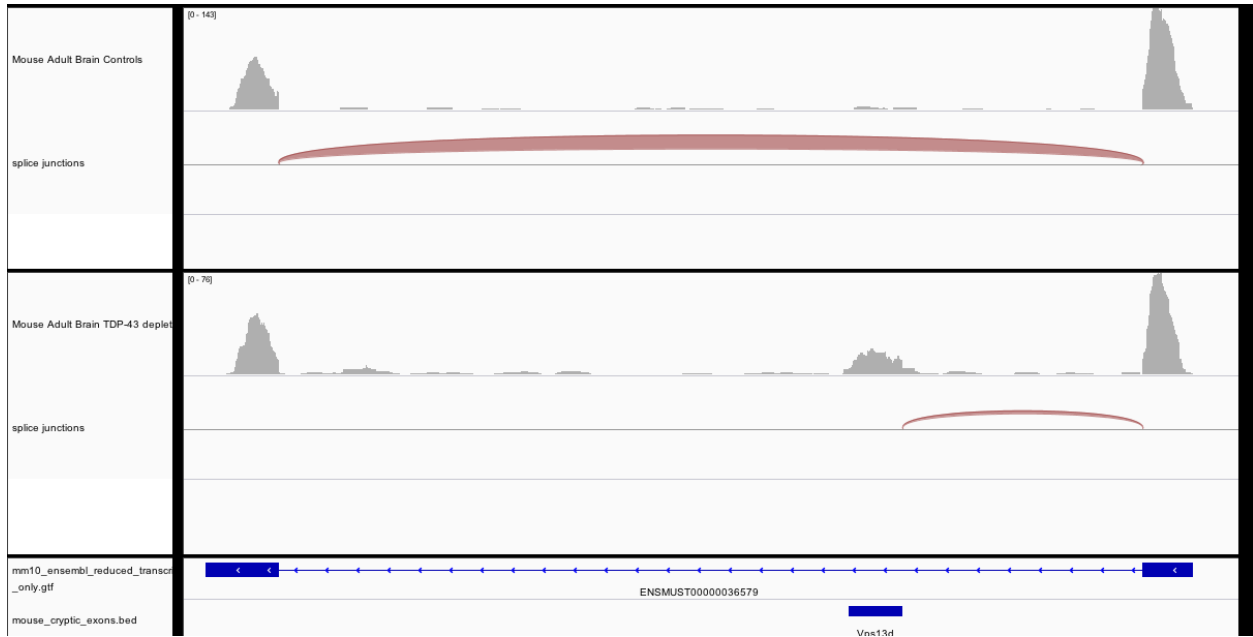

## Mouse Embryonic Stem Cells

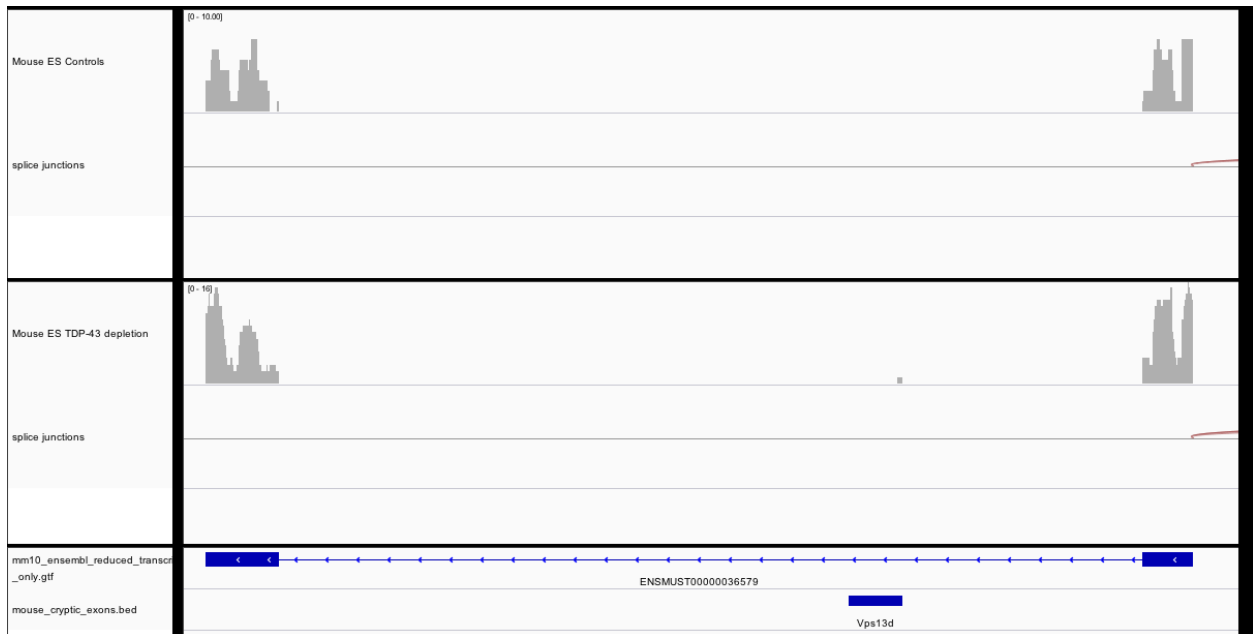

# 37 Ube2d1 E010i1

Mouse Adult Brain

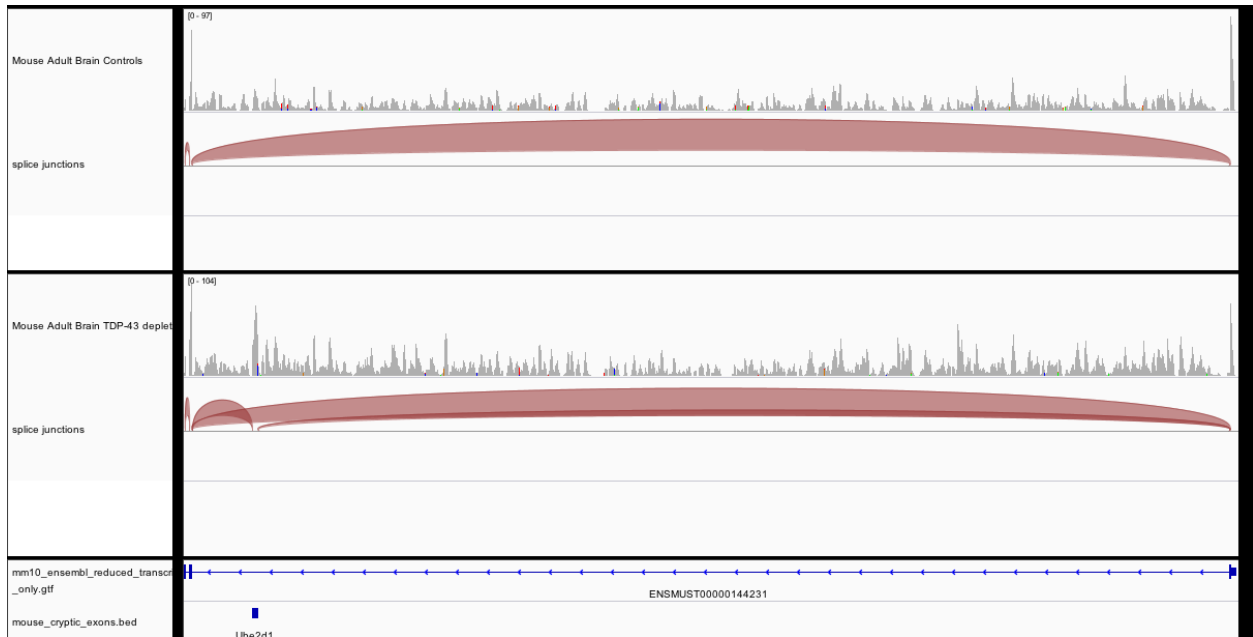

Mouse Embryonic Stem Cells

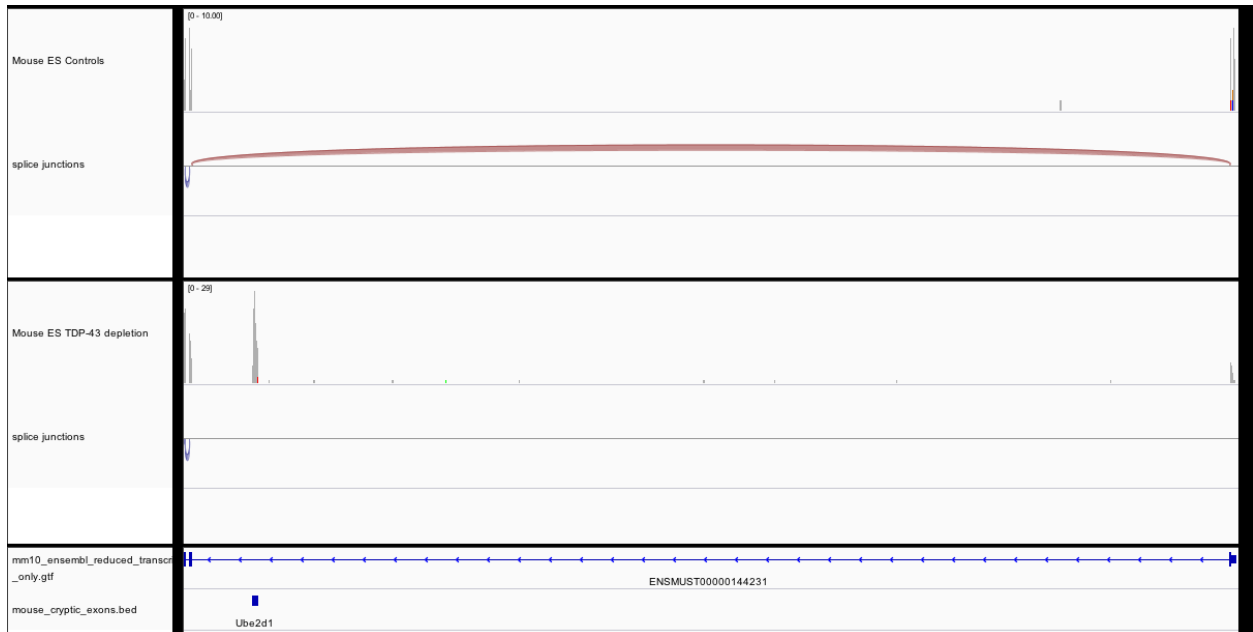

# 38 Hgsnat E001i1

## Mouse Adult Brain

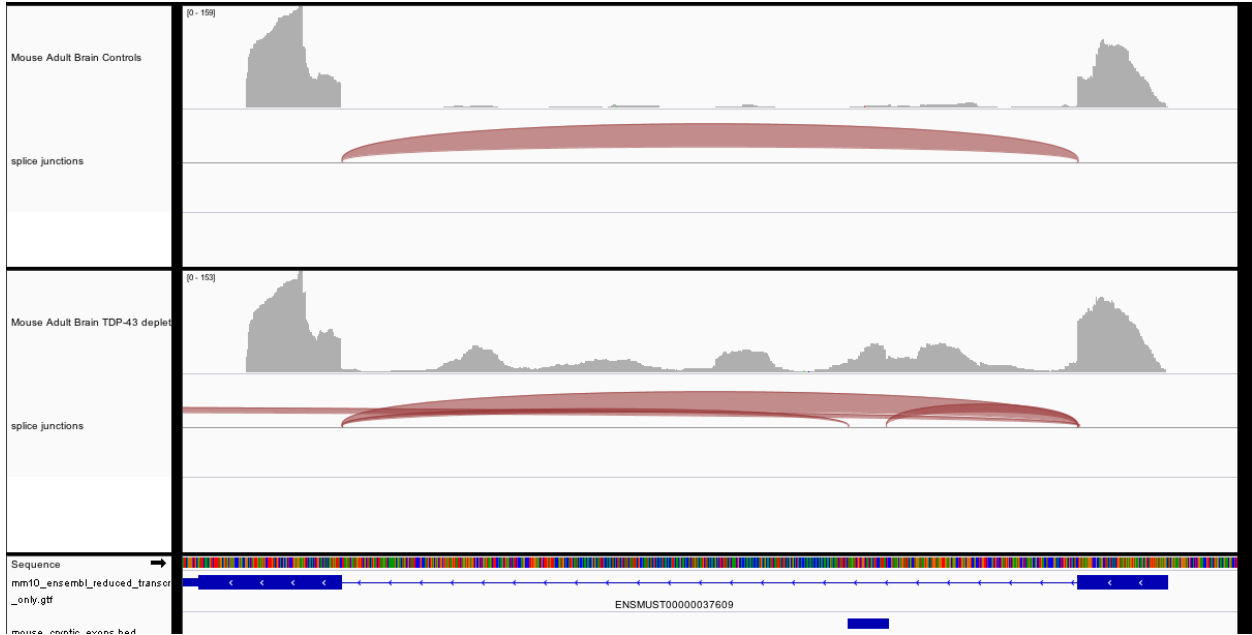

## Mouse Embryonic Stem Cells

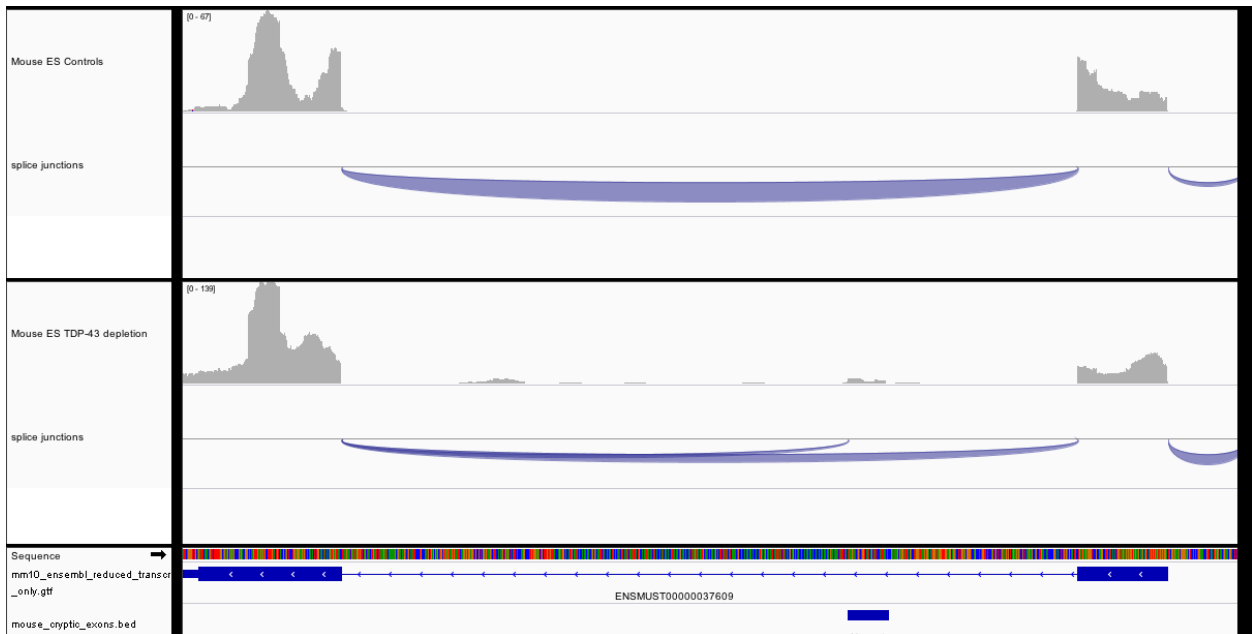

# 39 Elmod1 E003i2

## Mouse Adult Brain

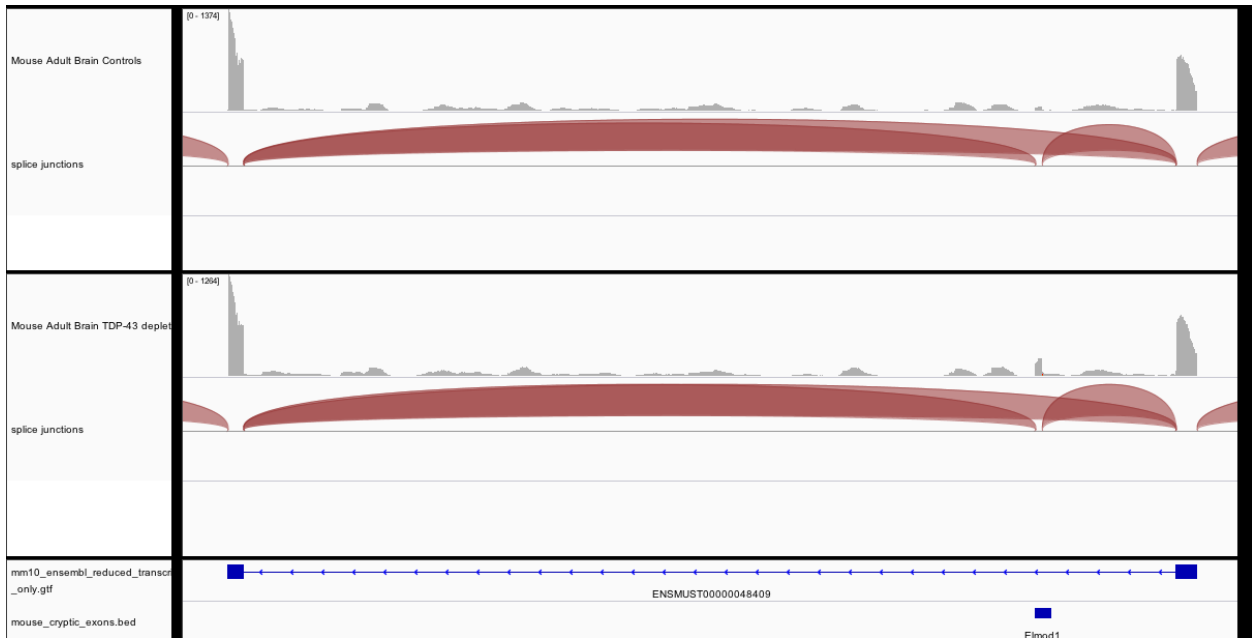

## Mouse Embryonic Stem Cells

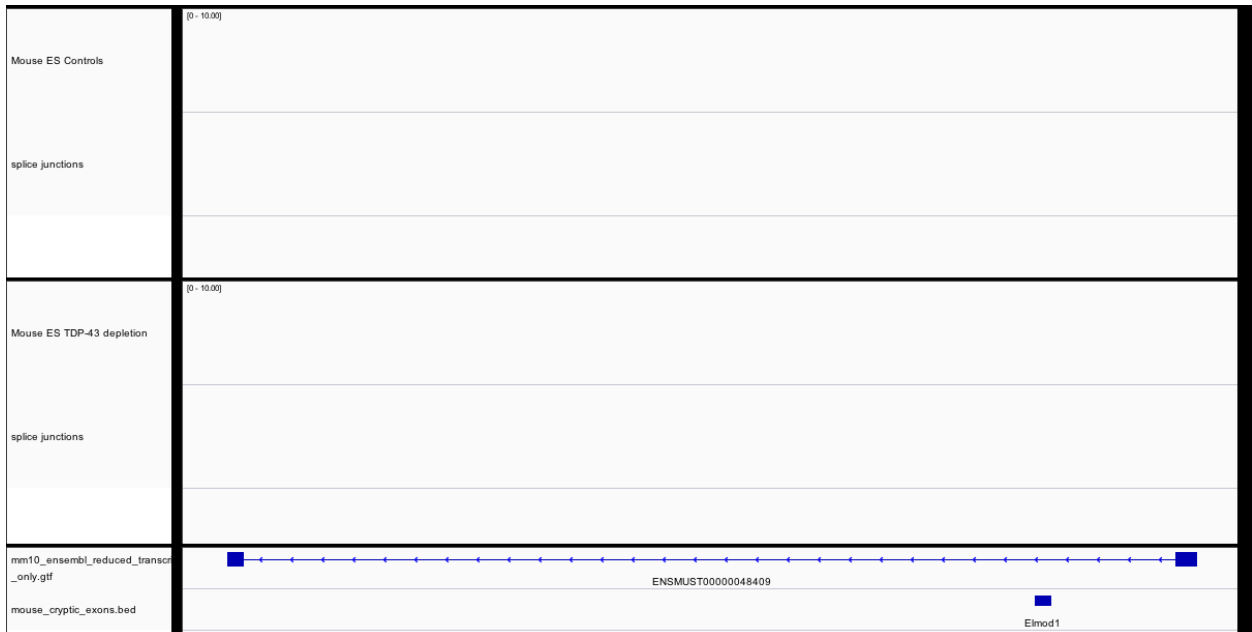



# 40 Mlx E007i7

## Mouse Adult Brain

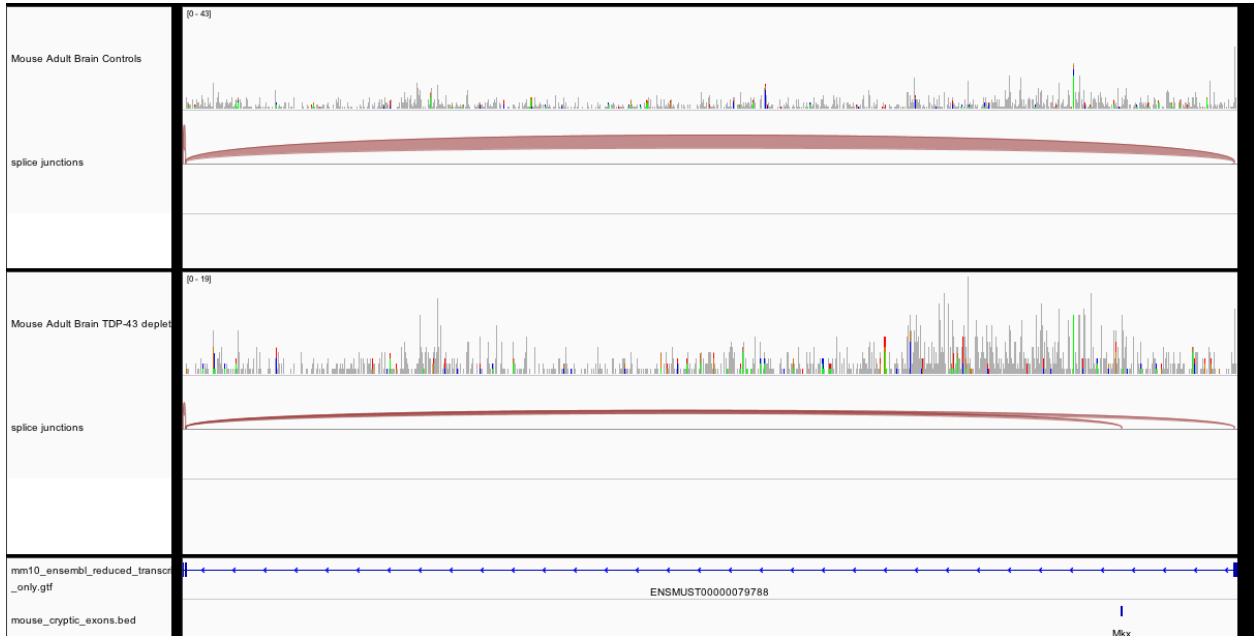

## Mouse Embryonic Stem Cells

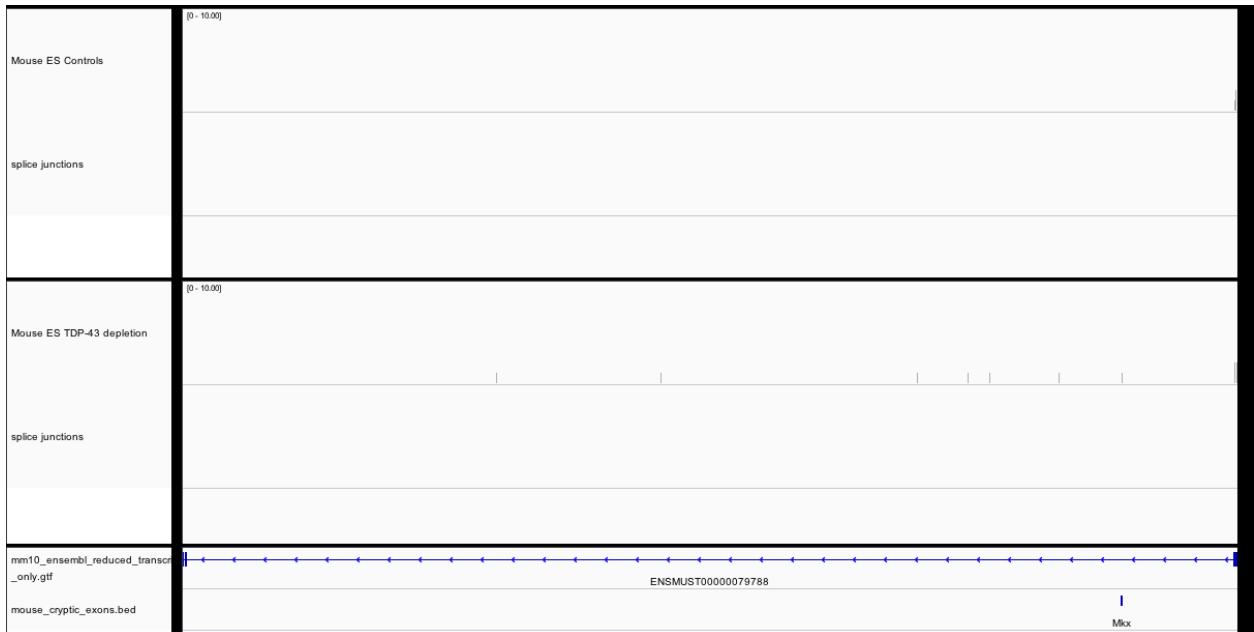

# 41 Hace1 E013i1

## Mouse Adult Brain

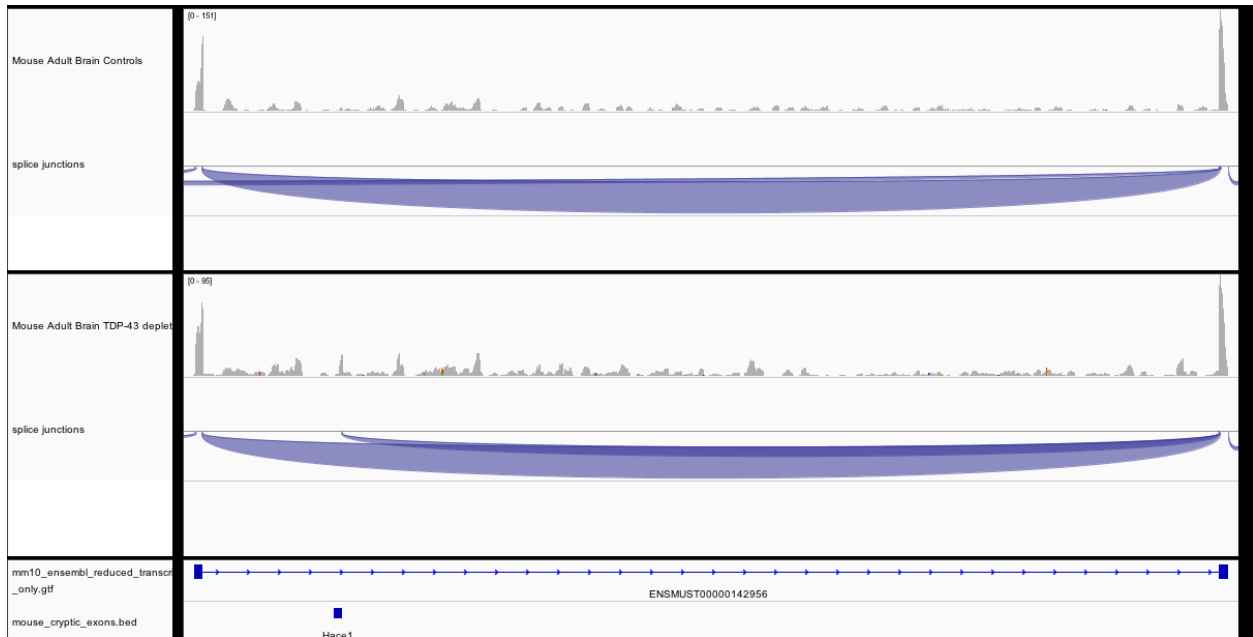

## Mouse Embryonic Stem Cells

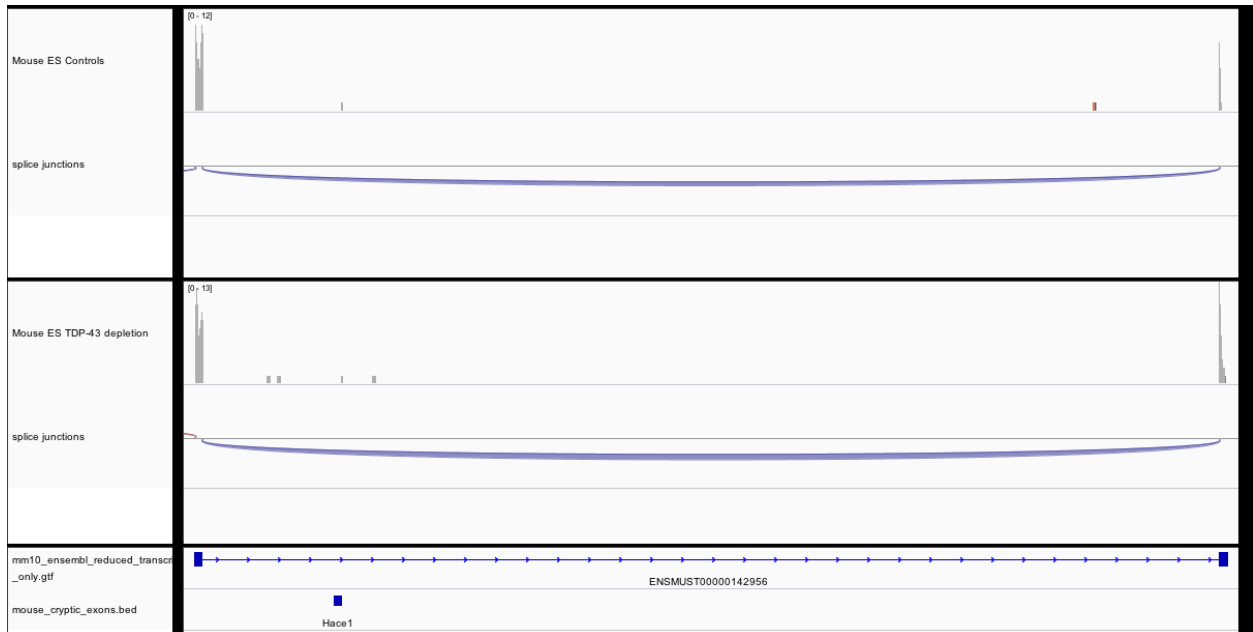

# 42 Fxyd2 E003i1

## Mouse Adult Brain

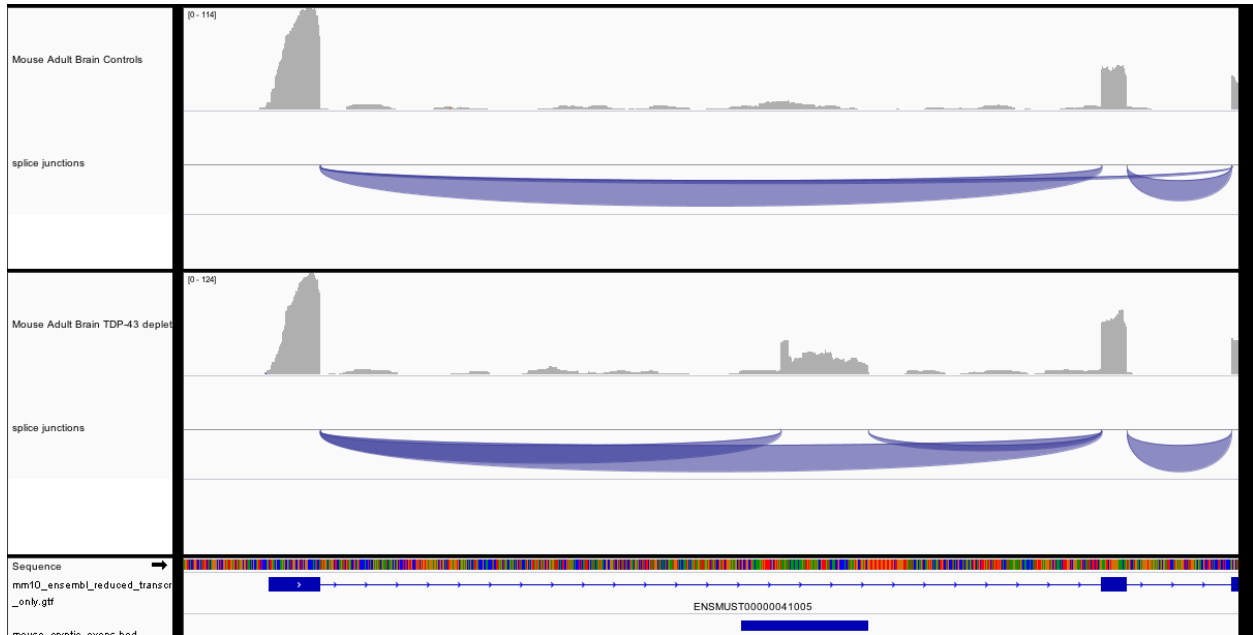

## Mouse Embryonic Stem Cells

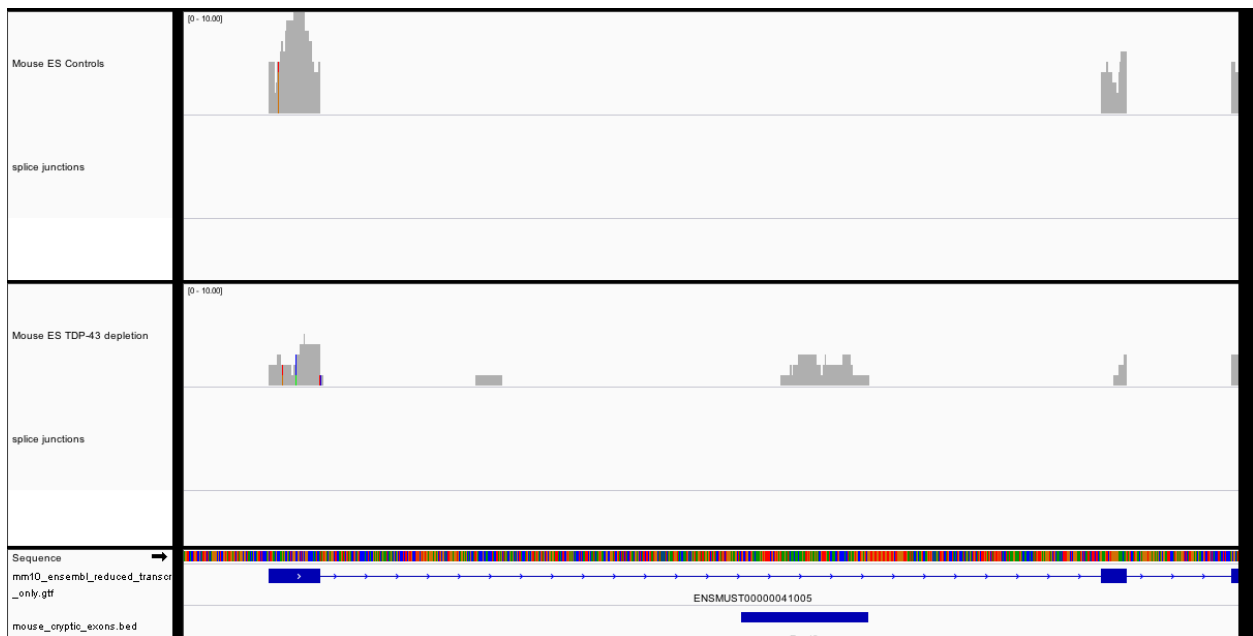

# 43 Thoc7 E007i1

## Mouse Adult Brain

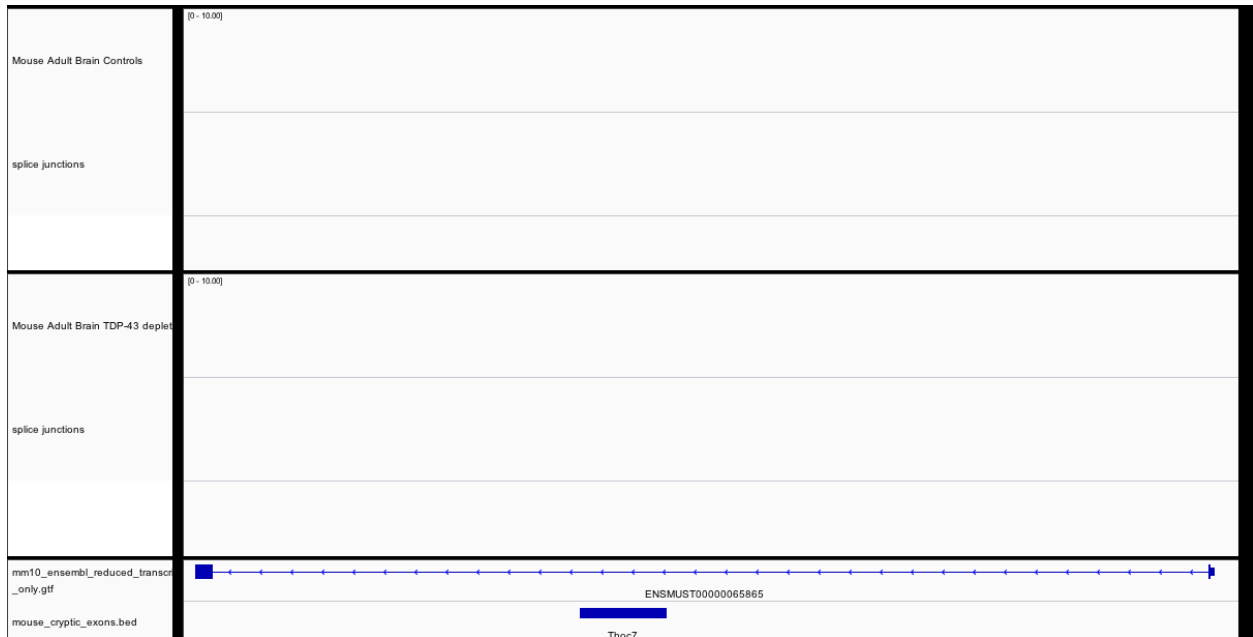

## Mouse Embryonic Stem Cells

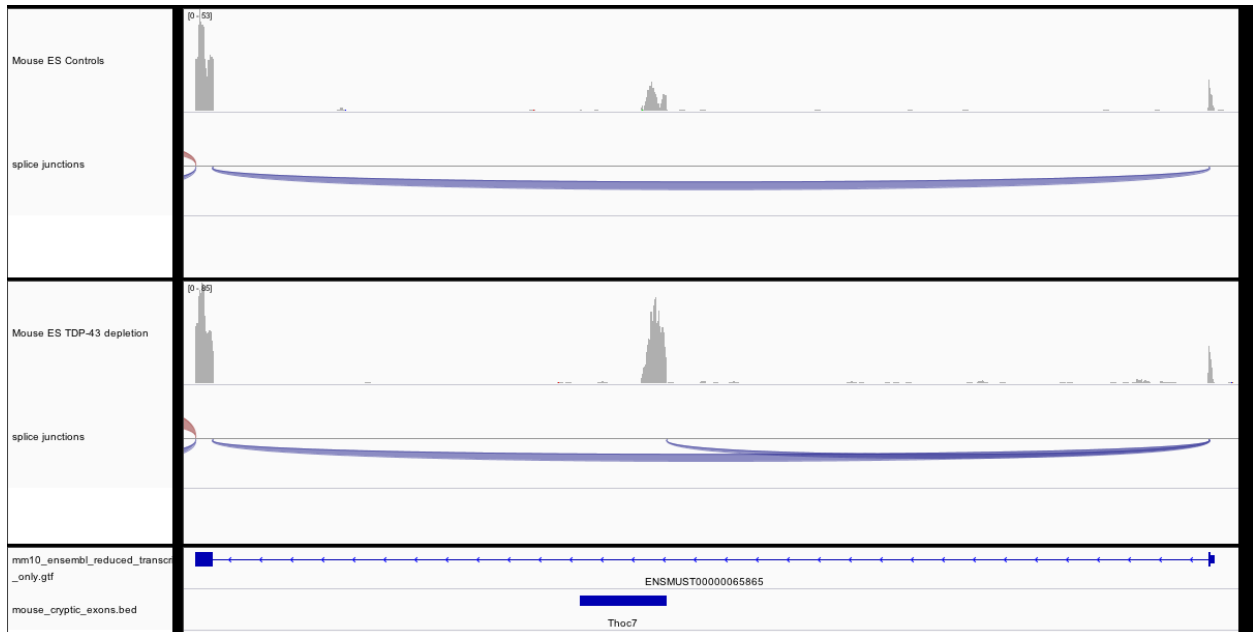

# 44 Nme6 E020i1

## Mouse Adult Brain

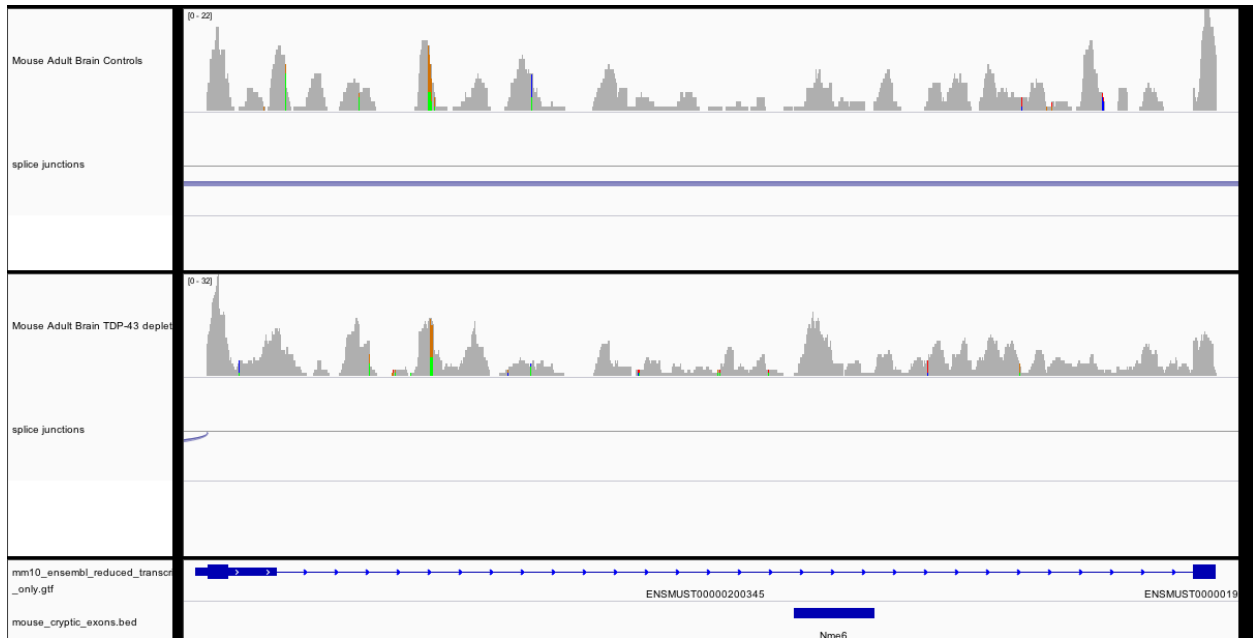

## Mouse Embryonic Stem Cells

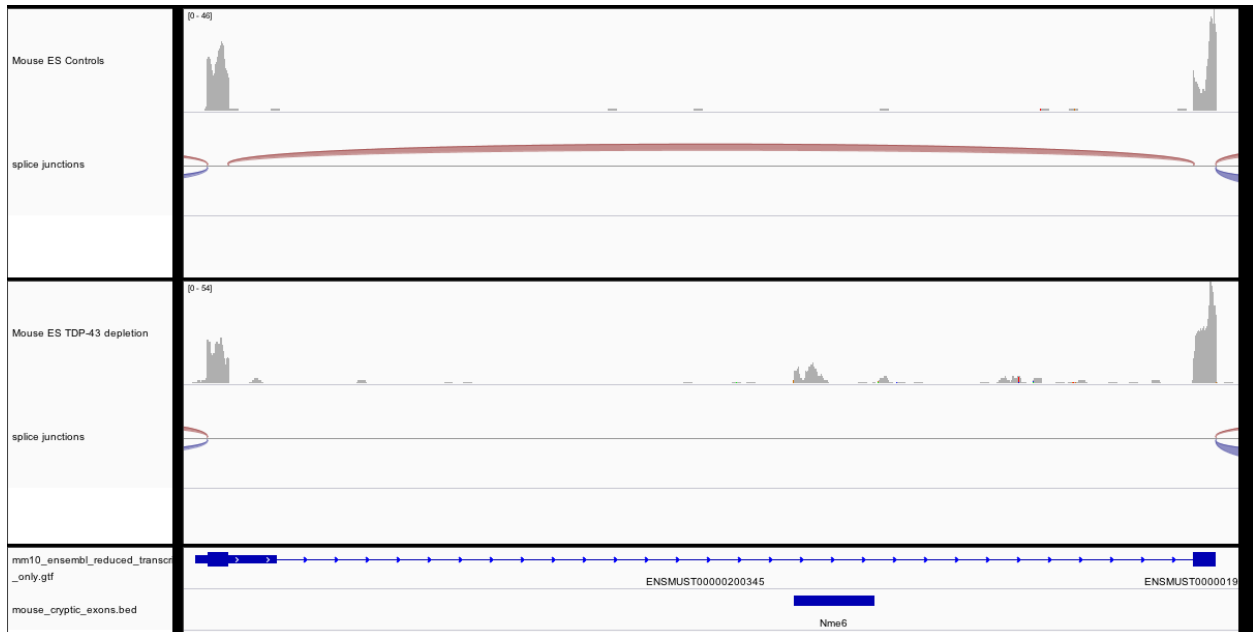

# 45 Wtip E001i1

## Mouse Adult Brain

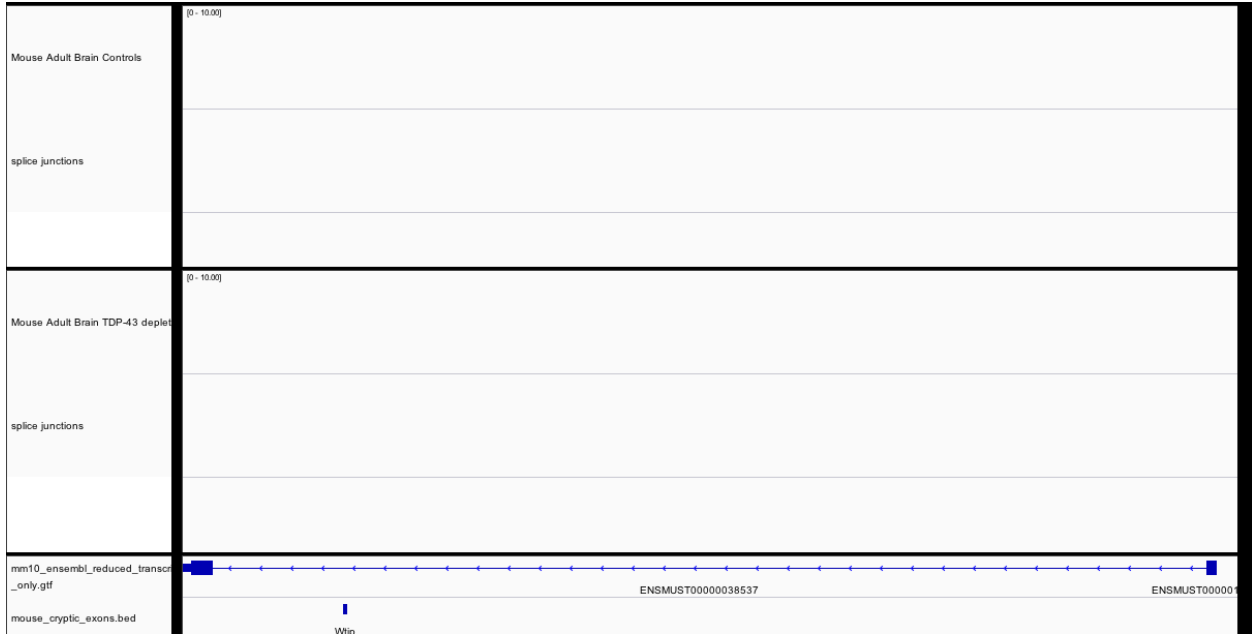

## Mouse Embryonic Stem Cells

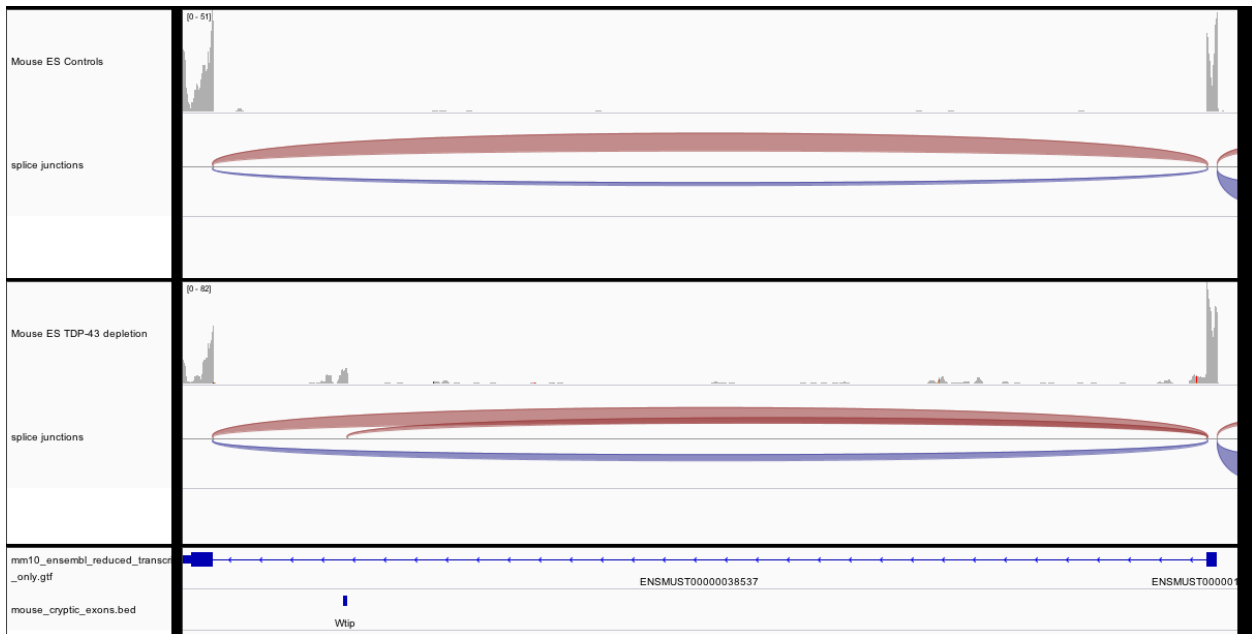

# 46 Gsta4 E005i2

## Mouse Adult Brain

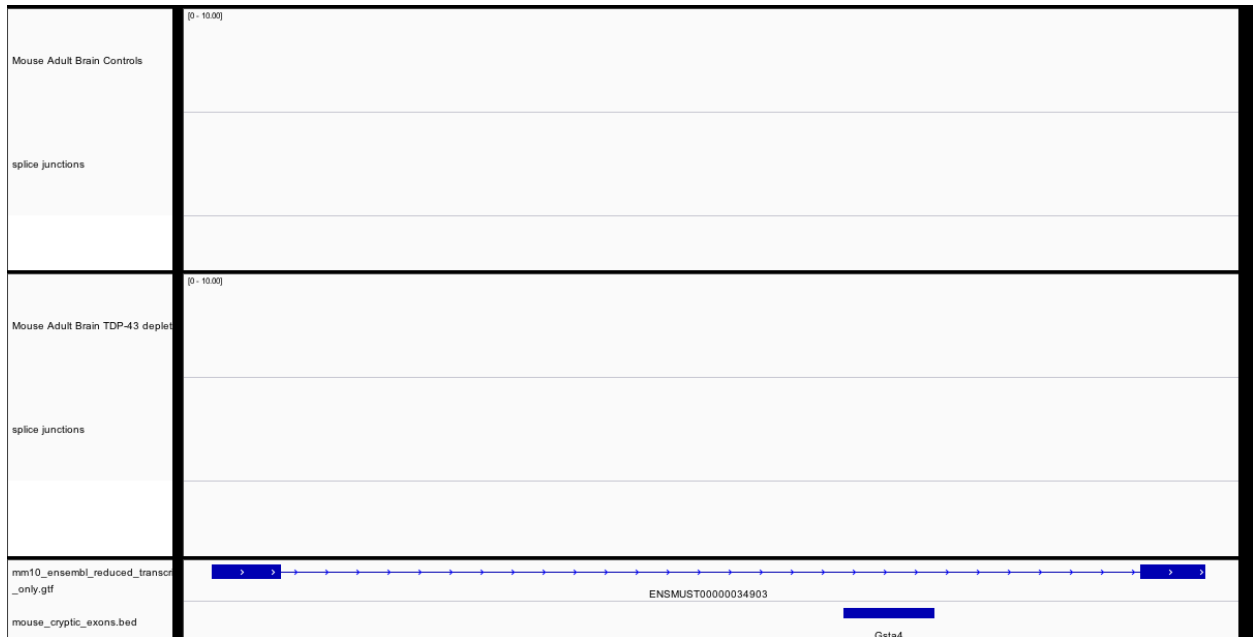

## Mouse Embryonic Stem Cells

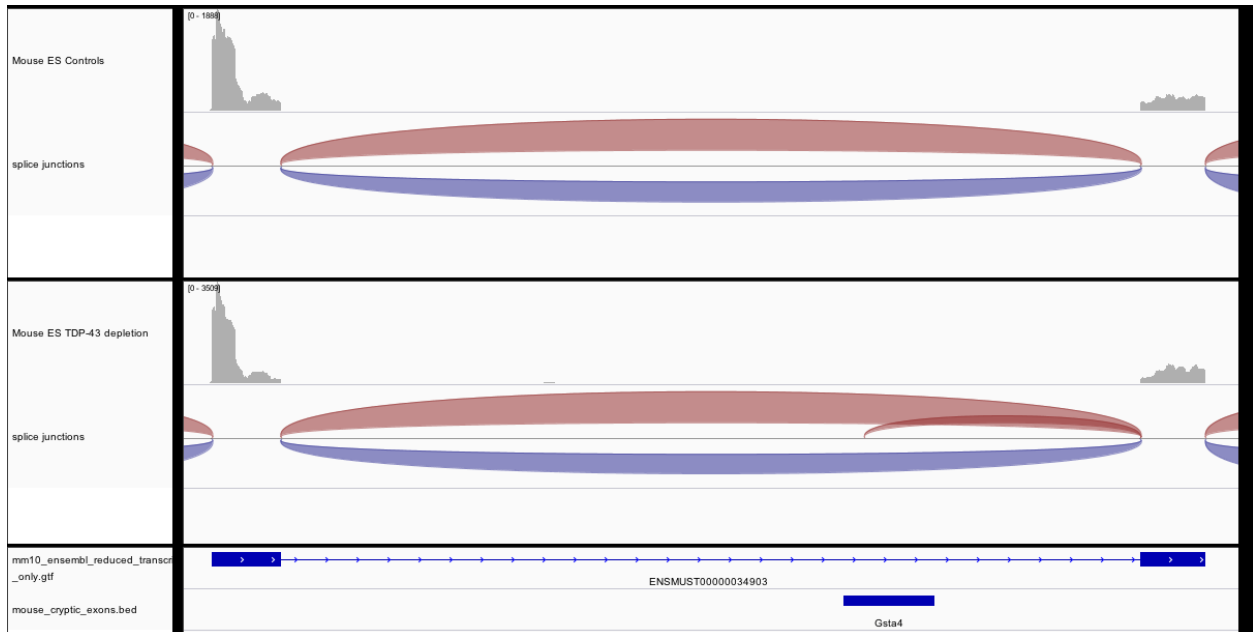

# 47 Slc7a6 E001i1

## Mouse Adult Brain

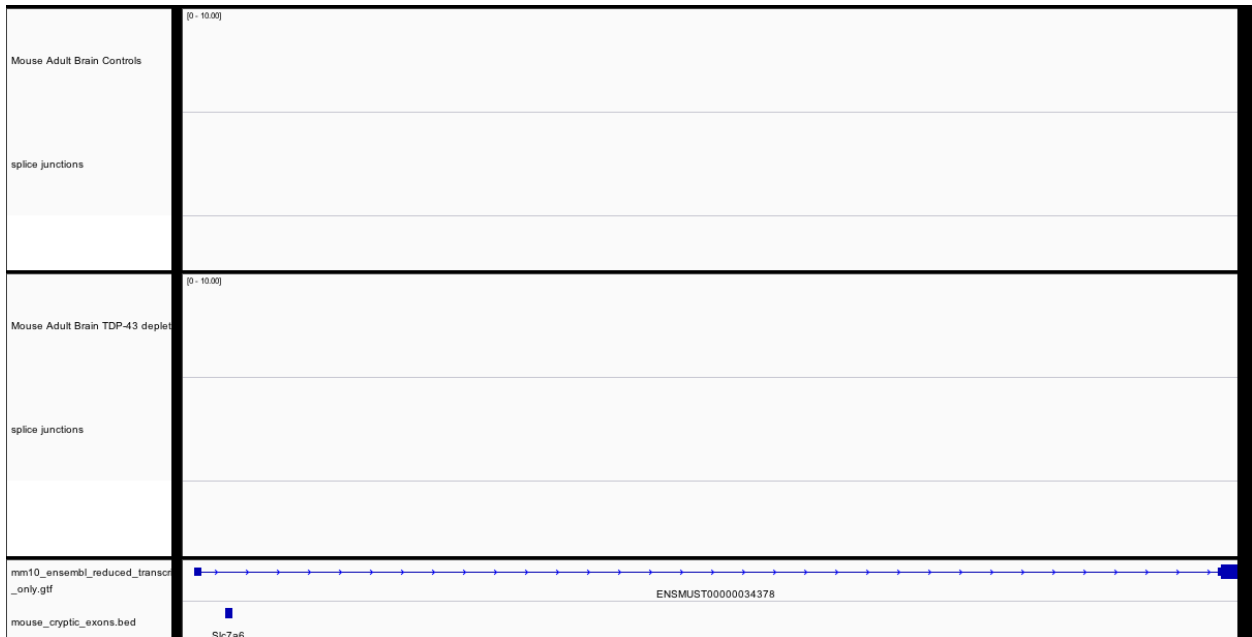

## Mouse Embryonic Stem Cells

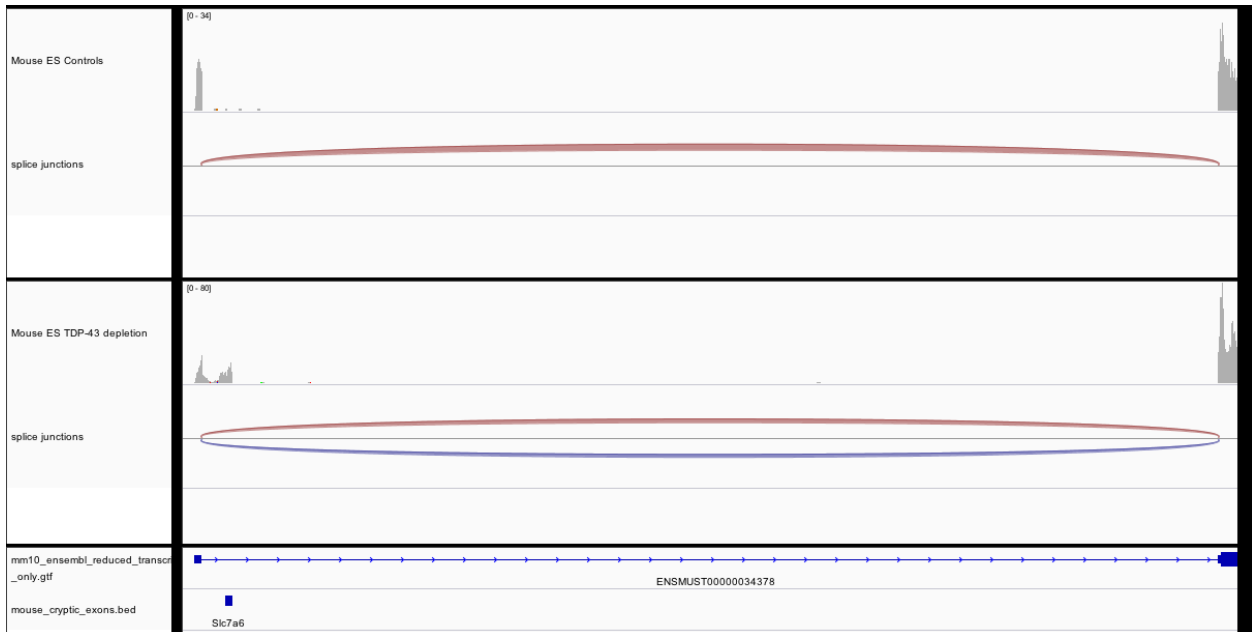



# 48 Flnb E040i1

Mouse Adult Brain

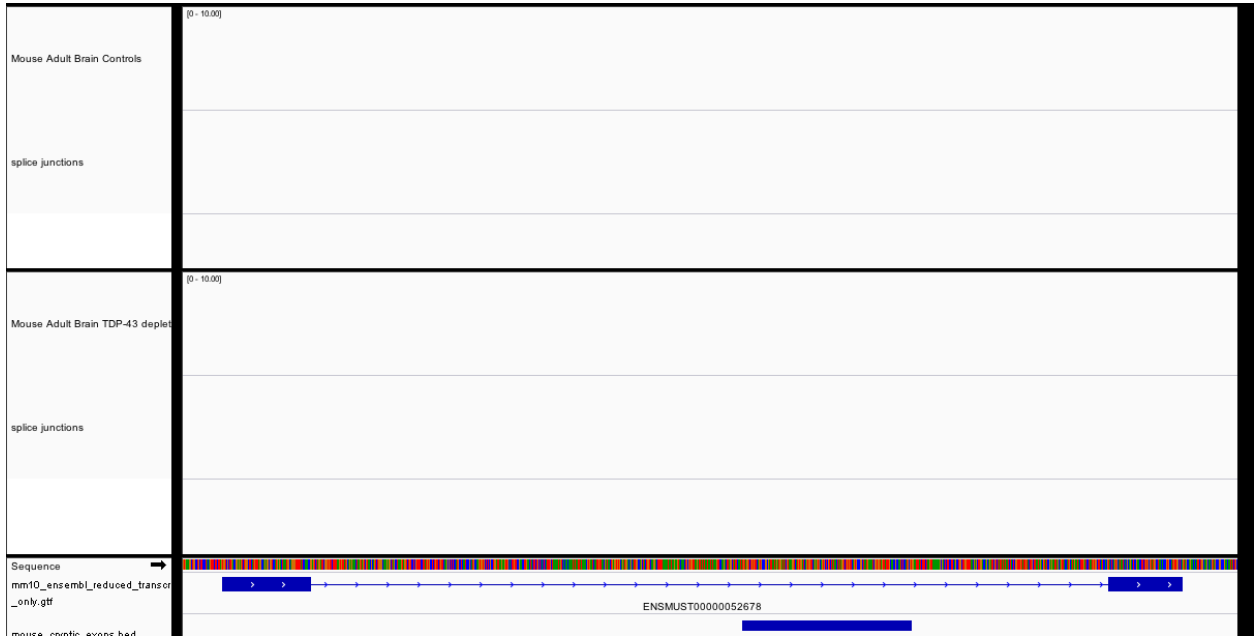

Mouse Embryonic Stem Cells

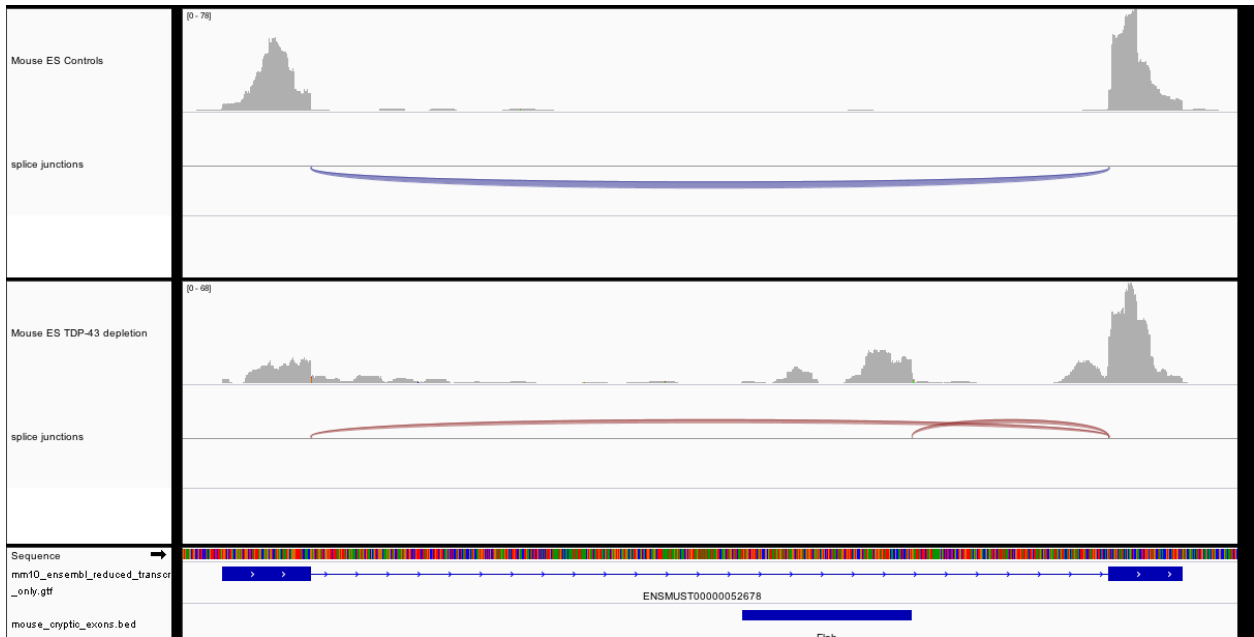

# 49 B4galnt3 E002i1

Mouse Adult Brain

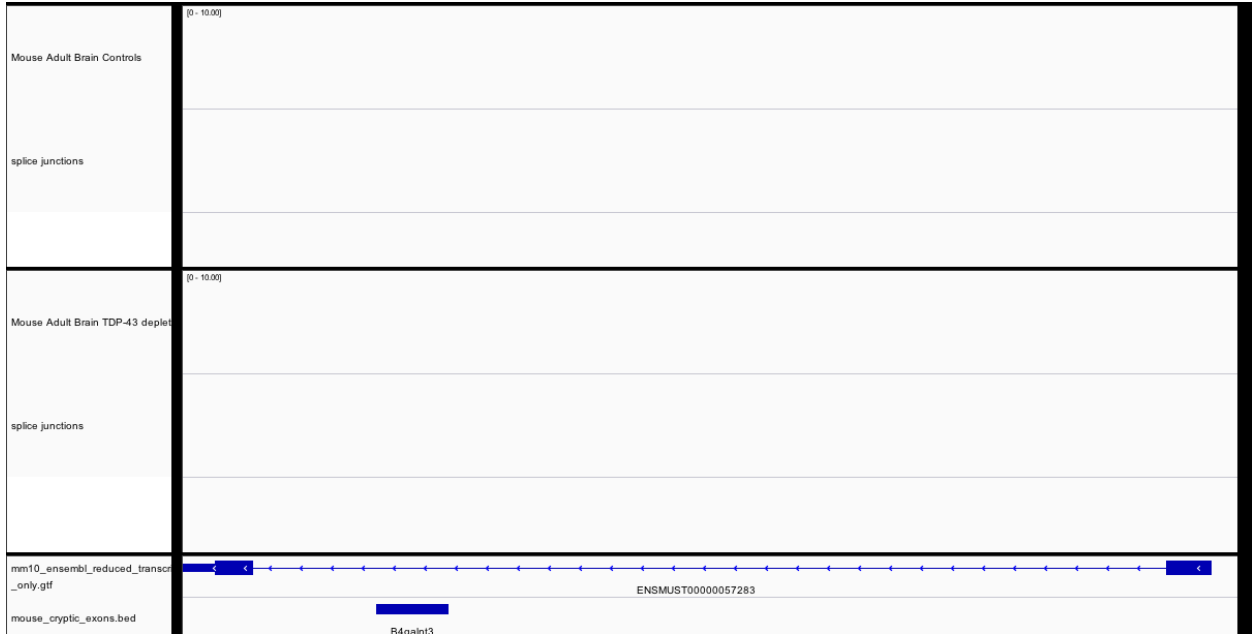

Mouse Embryonic Stem Cells

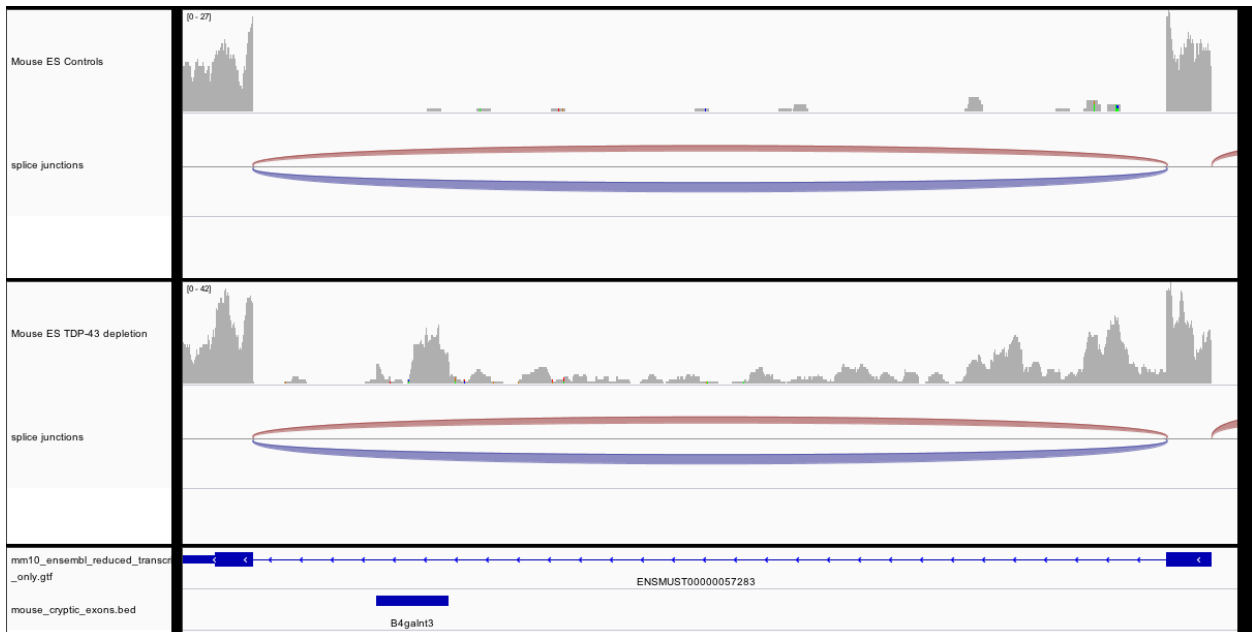

# 50 Psma2 E005i1

## Mouse Adult Brain

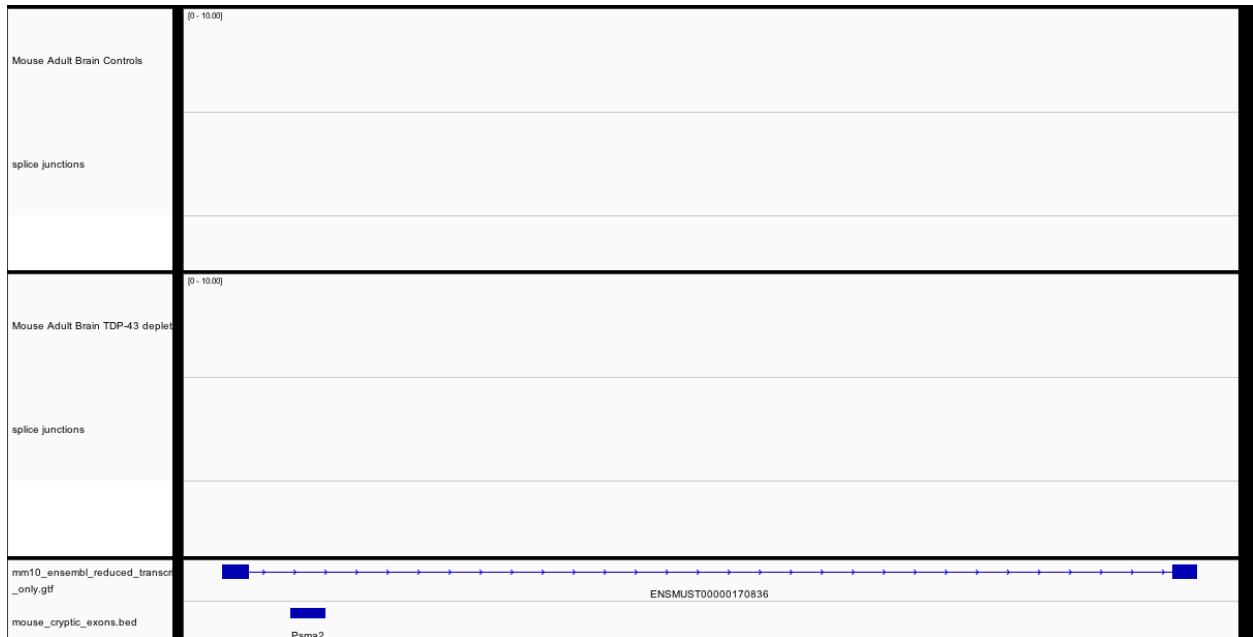

## Mouse Embryonic Stem Cells

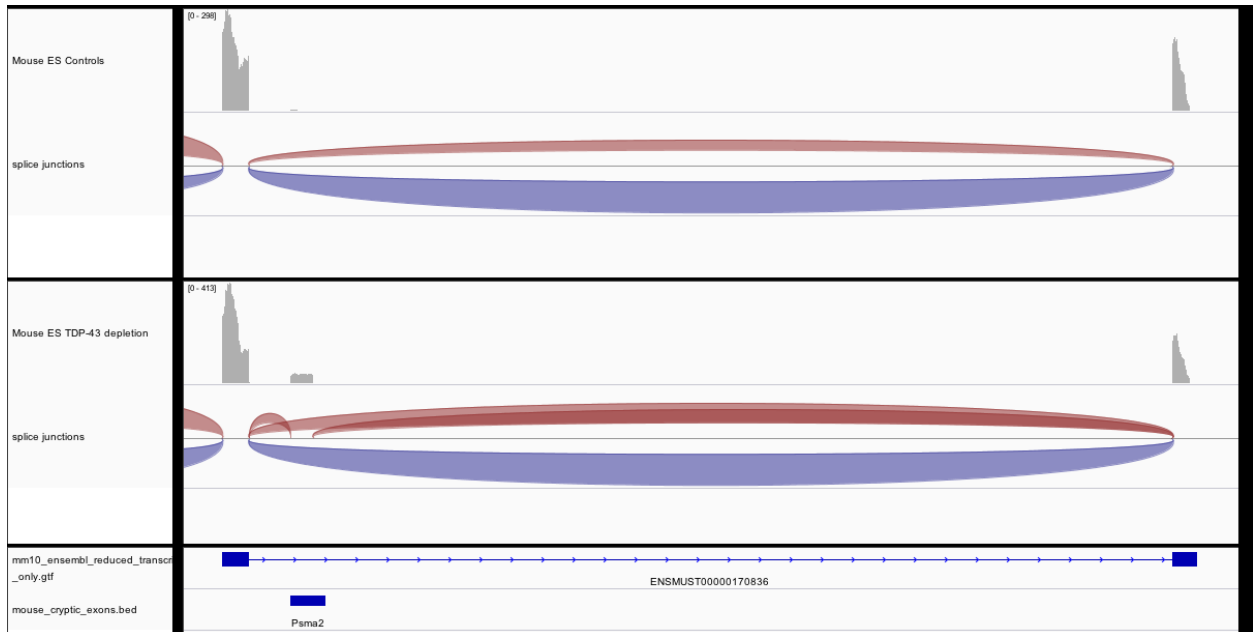

# 51 Abr E024i1

Mouse Adult Brain



Mouse Embryonic Stem Cells



# 52 Wasf3 E009i1

## Mouse Adult Brain

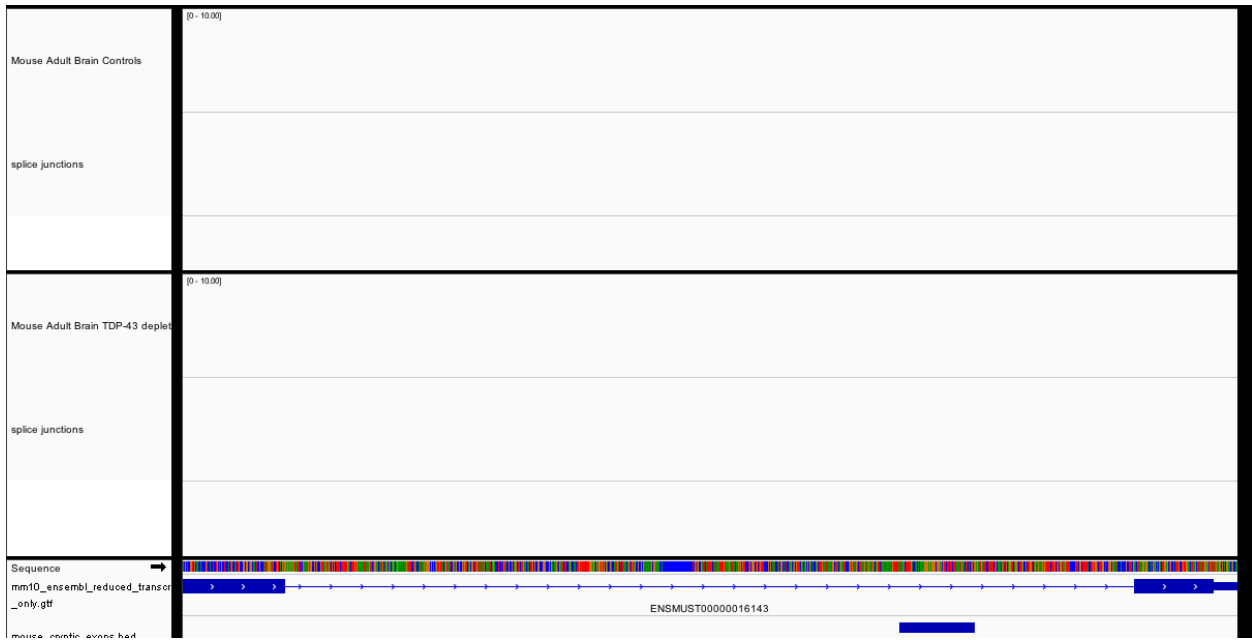

## Mouse Embryonic Stem Cells

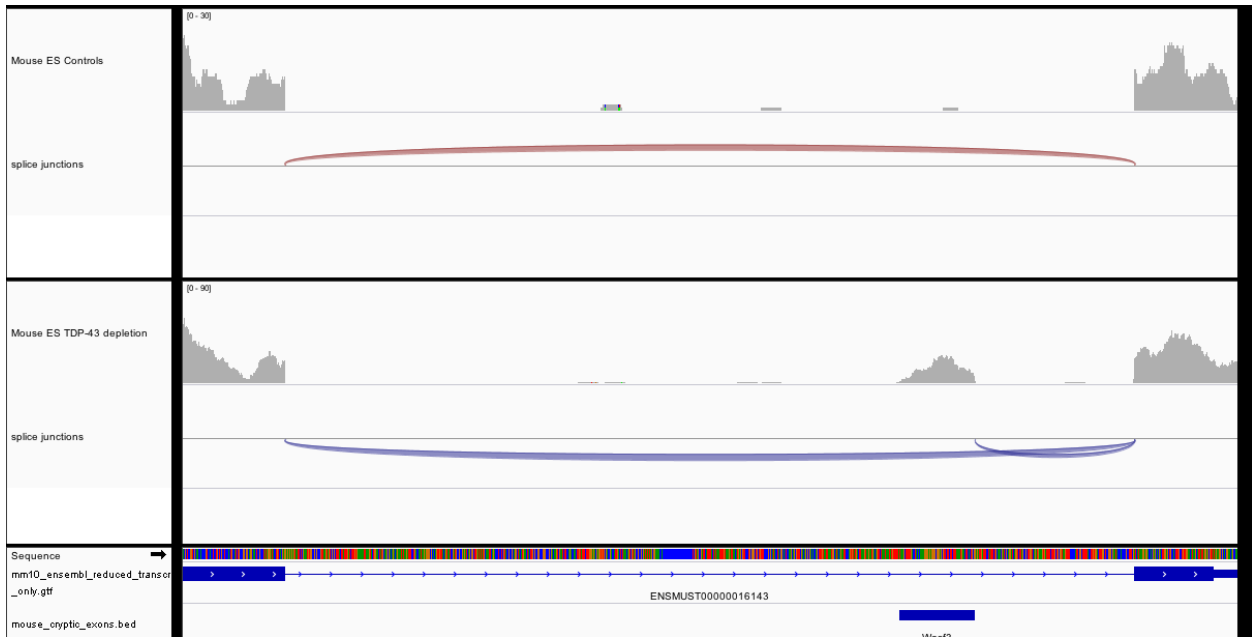

Supplement: Supplementary file [file 076117-1.pdf]
